# Supplementary material for: Relationships between social spending and childhood obesity in OECD countries: an ecological study
Source: PubMed Central journal article supplement — BMJ Open. 2021 Feb 23;11(2):e044205. doi: 10.1136/bmjopen-2020-044205 (PMC7907862; doi:10.1136/bmjopen-2020-044205), 2021-02-23
Supplement: bmjopen-2020-044205.draft_revisions.pdf [file bmjopen-2020-044205.draft_revisions.pdf]

# BMJ Open

BMJ Open is committed to open peer review. As part of this commitment we make the peer review history of every article we publish publicly available.

When an article is published we post the peer reviewers' comments and the authors' responses online. We also post the versions of the paper that were used during peer review. These are the versions that the peer review comments apply to.

The versions of the paper that follow are the versions that were submitted during the peer review process. They are not the versions of record or the final published versions. They should not be cited or distributed as the published version of this manuscript.

BMJ Open is an open access journal and the full, final, typeset and author-corrected version of record of the manuscript is available on our site with no access controls, subscription charges or pay-per-view fees (<http://bmjopen.bmj.com>).

If you have any questions on BMJ Open's open peer review process please email [info.bmjopen@bmj.com](mailto:info.bmjopen@bmj.com)

# BMJ Open

## Relationships between Social Spending and Childhood Obesity in High-Income Countries: More Welfare, Less Obesity?

|                               |                                                                                                                                                                                                                                                                                                                                                                  |
|-------------------------------|------------------------------------------------------------------------------------------------------------------------------------------------------------------------------------------------------------------------------------------------------------------------------------------------------------------------------------------------------------------|
| Journal:                      | <i>BMJ Open</i>                                                                                                                                                                                                                                                                                                                                                  |
| Manuscript ID                 | bmjopen-2020-044205                                                                                                                                                                                                                                                                                                                                              |
| Article Type:                 | Original research                                                                                                                                                                                                                                                                                                                                                |
| Date Submitted by the Author: | 26-Aug-2020                                                                                                                                                                                                                                                                                                                                                      |
| Complete List of Authors:     | Miyawaki, Atsushi; The University of Tokyo, Department of Public Health, Graduate School of Medicine<br>Evans, Charlotte; University of Leeds, School of Food Science and Nutrition<br>Lucas, Patricia; University of Bristol, School for Policy Studies<br>Kobayashi, Yasuki; The University of Tokyo, Department of Public Health, Graduate School of Medicine |
| Keywords:                     | SOCIAL MEDICINE, Community child health < PAEDIATRICS, Health policy < HEALTH SERVICES ADMINISTRATION & MANAGEMENT, International health services < HEALTH SERVICES ADMINISTRATION & MANAGEMENT                                                                                                                                                                  |
|                               |                                                                                                                                                                                                                                                                                                                                                                  |

SCHOLARONE™  
Manuscripts

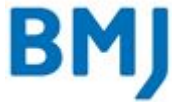

I, the Submitting Author has the right to grant and does grant on behalf of all authors of the Work (as defined in the below author licence), an exclusive licence and/or a non-exclusive licence for contributions from authors who are: i) UK Crown employees; ii) where BMJ has agreed a CC-BY licence shall apply, and/or iii) in accordance with the terms applicable for US Federal Government officers or employees acting as part of their official duties; on a worldwide, perpetual, irrevocable, royalty-free basis to BMJ Publishing Group Ltd ("BMJ") its licensees and where the relevant Journal is co-owned by BMJ to the co-owners of the Journal, to publish the Work in this journal and any other BMJ products and to exploit all rights, as set out in our [licence](#).

The Submitting Author accepts and understands that any supply made under these terms is made by BMJ to the Submitting Author unless you are acting as an employee on behalf of your employer or a postgraduate student of an affiliated institution which is paying any applicable article publishing charge ("APC") for Open Access articles. Where the Submitting Author wishes to make the Work available on an Open Access basis (and intends to pay the relevant APC), the terms of reuse of such Open Access shall be governed by a Creative Commons licence – details of these licences and which [Creative Commons](#) licence will apply to this Work are set out in our licence referred to above.

Other than as permitted in any relevant BMJ Author's Self Archiving Policies, I confirm this Work has not been accepted for publication elsewhere, is not being considered for publication elsewhere and does not duplicate material already published. I confirm all authors consent to publication of this Work and authorise the granting of this licence.

1  
2  
3 **Relationships between Social Spending and Childhood Obesity in High-Income Countries:**  
4  
5 **More Welfare, Less Obesity?**  
6  
7  
8  
9

10 Atsushi Miyawaki, MD, PhD<sup>1,2</sup>

11 Charlotte E.L. Evans, PhD<sup>3</sup>

12 Patricia J. Lucas, PhD<sup>4</sup>

13 Yasuki Kobayashi, MD, PhD<sup>1</sup>

14  
15  
16  
17  
18  
19  
20  
21 **Affiliations**

22  
23  
24 <sup>1</sup> Department of Public Health, Graduate School of Medicine, The University of Tokyo,  
25  
26 1130033, Japan

27  
28 <sup>2</sup> Department of Health Services Research, Faculty of Medicine, University of Tsukuba,  
29  
30 3050006, Japan

31  
32  
33 <sup>3</sup> Nutritional Sciences and Epidemiology, School of Food Science and Nutrition, University of  
34  
35 Leeds, LS2 9JT, UK

36  
37  
38 <sup>4</sup> Child Health Research, School for Policy Studies, University of Bristol, BS8 1TZ, UK

39  
40  
41  
42 **Running title:** Social Spending and Childhood Obesity

43  
44  
45  
46 **Corresponding author:**

47 Atsushi Miyawaki, MD, PhD

48 Assistant Professor

49 Department of Public Health, Graduate School of Medicine, The University of Tokyo

1  
2  
3 7-3-1 Hongo, Bunkyo-ku, Tokyo, 1130033, Japan  
4

5 Email: amiyawaki-tky@umin.ac.jp  
6

7  
8 Phone: +81-3-5841-3494  
9

10  
11  
12 **Word count:** 3,455 words  
13

14 **Number of tables:** 2  
15

16 **Number of figures:** 3  
17  
18  
19  
20  
21  
22  
23  
24  
25  
26  
27  
28  
29  
30  
31  
32  
33  
34  
35  
36  
37  
38  
39  
40  
41  
42  
43  
44  
45  
46  
47  
48  
49  
50  
51  
52  
53  
54  
55  
56  
57  
58  
59  
60

**ABSTRACT** (293 words)

**Objectives:** The burden of childhood obesity is clustered among children in low-socioeconomic groups. Social spending on children—public welfare expenditure on families and education—may curb childhood obesity by reducing socioeconomic disadvantages. The objective of this study was to examine the relationship between social spending on children and childhood obesity across the Organization for Economic Cooperation and Development (OECD) countries.

**Design:** Ecological study.

**Setting:** Data on social spending on children were obtained from the OECD Social Expenditure Database and the OECD educational finance indicators dataset during 2000–2015. Data on childhood obesity were obtained from the NCD Risk Factor Collaboration database. Data on other sociodemographic factors were obtained from the OECD.Stat database.

**Participants:** Aggregated statistics on obesity among children aged 5 to 19 years, estimated for OECD 35 countries based on the measured height and weight on 31.5 million children.

**Outcome Measures:** Country-level prevalence of obesity among children aged 5 to 19 years.

**Results:** In cross-sectional analyses in 2015, social spending on children was inversely associated with the prevalence of childhood obesity after adjusting for the gross domestic product (GDP) per capita, unemployment rate, poverty rate (partial correlations:  $\rho=-0.51$ ;  $p<0.01$  for girls and  $\rho=-0.43$ ;  $p=0.01$  for boys). In longitudinal analyses from 2000 to 2015, countries with greater increases in social spending on children had smaller increases in childhood obesity ( $\rho=-0.51$ ;  $p<0.01$  for girls and  $\rho=-0.42$ ;  $p=0.02$  for boys), after adjusting for the changes in GDP per capita, unemployment rate, and poverty rate. For girls, the dimensions of social spending that contributed to these associations between the changes in social spending on

1  
2  
3 children and childhood obesity were early childhood education and care (ECEC) and school  
4 education; for boys, ECEC contributed most.  
5  
6

7 **Conclusion:** Countries that increase social spending on children tend to experience smaller  
8 increases in childhood obesity.  
9  
10  
11  
12

13  
14 **Keywords:** Social medicine; Community child health; Health policy; International health  
15 services  
16  
17  
18  
19  
20  
21  
22  
23  
24  
25  
26  
27  
28  
29  
30  
31  
32  
33  
34  
35  
36  
37  
38  
39  
40  
41  
42  
43  
44  
45  
46  
47  
48  
49  
50  
51  
52  
53  
54  
55  
56  
57  
58  
59  
60

## ARTICLE SUMMARY

### Strengths and limitations of this study

- This is the first study that has investigated the relationship between public social spending on children and childhood obesity in the Organization for Economic Cooperation and Development (OECD) countries.
- We further focused on which dimensions of public social spending contributed most to these relationships.
- We did not focus on content and generosity of individual social policies nor private social spending. Future work should focus more on the impact of individual social policies on childhood obesity.
- Our findings were based on OECD countries' data and might not be generalizable to low- and middle-income countries.



## INTRODUCTION

The prevalence of childhood obesity has almost doubled in high-income countries during the last two decades. Current estimates suggest nearly one in ten children are obese.[1] Obesity in early life is an urgent public health issue due to its subsequent health consequences, including adult obesity,[2] early onset of non-communicable diseases,[3] premature death [3,4], and its influence on children's psychosocial development.[5] Childhood obesity is considered to have substantial economic burdens at the societal and individual level,[6,7]. Policymakers are increasingly responding to this growing public health crisis.

Although the proximal causes of this epidemic of obesity primarily are in individual behaviours such as higher consumption of food high in fat and sugar and increased sedentary behaviour,[8] these factors are shaped by upstream determinants related to socioeconomic conditions and the obesogenic environment.[9] Several studies have demonstrated that low-socioeconomic status of households is a risk factor for childhood obesity.[10,11] For example, those with both less education and lower family income are more likely to consume highly obesogenic fast foods.[12] Recognizing such social determinants of obesity, the World Health Organization (WHO) has recently recommended improving access to high-quality food in disadvantaged families in tandem with policies including taxation on unhealthy food and nutritional labels.[13] Besides these public health interventions, another possible approach is to reduce socioeconomic disadvantage itself, through social protection (e.g., income supplements for families and public investments in education).[14] Yet, less attention has been paid to the roles of such social protection policies in childhood obesity prevention. This gap partly relates to the difficulty of estimating social spending at the individual level.

1  
2  
3  
4  
5 Although all high-income countries have social protection programs, there are large cross-  
6 national variations in their generosity.[15,16] *Social spending*—how much the government  
7 spends on social protection [17]—has been considered as an indicator to quantitatively gauge the  
8 generosity of social protection programs in a country or region. Several studies have recently  
9 recognized the importance of social spending as an indicator of macrosocial determinants of  
10 health and demonstrated the association between social spending and better population health  
11 outcomes including life expectancy, infant mortality, and low birth weight.[15,18] If the same  
12 macrosocial determinants are drivers of childhood obesity, increasing social spending on  
13 children will similarly operate as an upstream approach to curb childhood obesity. The possible  
14 mechanisms may include tax credits and paid parental leave, that increase or stabilize household  
15 income, or food vouchers offered to low-income families, which enable them to improve the  
16 quality of family meals.[19] Higher quality nutritional and physical education at school also  
17 encourages children to have a healthier diet and to be more active.[20] However, little is known  
18 so far about the relationship between gross public social spending on children and childhood  
19 obesity.

20  
21  
22  
23  
24  
25  
26  
27  
28  
29  
30  
31  
32  
33  
34  
35  
36  
37  
38  
39  
40  
41  
42 To bridge this knowledge gap, in this study, we sought to answer the following questions using  
43 data from the Organization for Economic Cooperation and Development (OECD) countries.

44  
45  
46  
47 First, is social spending on children associated with the prevalence of childhood obesity?

48  
49  
50  
51  
52  
53  
54  
55  
56  
57  
58  
59  
60  
Second, if so, which types of social spending contribute to this association? In this study, we  
focus on between-country differences, considering gross social spending as a macrosocial  
indicator. The mechanisms via which social spending may influence childhood obesity are

1  
2  
3 numerous and, at the individual level, childhood obesity is likely better predicted by individual  
4  
5 circumstance. To estimate the impact of macro-economic policies, we report on differences at  
6  
7 this level.  
8  
9

## 11 12 **METHODS**

### 13 14 **Study design and sample**

15  
16 We conducted a panel data analysis of 35 OECD countries using the NCD Risk Factor  
17  
18 Collaboration (NCD-RisC) database,[21] which provides trends of childhood obesity during  
19  
20 1975–2016 in 200 countries. We examined social spending on children using (1) the OECD  
21  
22 Social Expenditure Database (SOCX) [22] and (2) the OECD educational finance indicators  
23  
24 dataset.[23] The SOCX database includes internationally comparable statistics on public social  
25  
26 spending (“public” means “by the central, state, or local government” [17]) across 35 OECD  
27  
28 countries. The spending is categorised into “old age,” “survivors,” “incapacity related,” “family,”  
29  
30 “active labour market program,” “unemployment,” “housing,” and “other social policy areas.”  
31  
32 We focused on the category “family” because this category is most likely to measure direct  
33  
34 benefits to children.[24] Although we anticipate that children will benefit from indirect spending  
35  
36 on, for example, unemployment programs and housing, including these categories would  
37  
38 overestimate the sums reaching families with children). We did not include private social  
39  
40 spending (“private” means that it came from other sources than the general government) because  
41  
42 it was not available for most countries in the SOCX dataset. Although education is considered as  
43  
44 an essential aspect of social spending,[16] while early childhood education and care [ECEC] is  
45  
46 included in the SOCX datasets, spending on school education is not. Thus, we obtained  
47  
48 information on public social spending on school education from the OECD’s educational finance  
49  
50  
51  
52  
53  
54  
55  
56  
57  
58  
59  
60

1  
2  
3 indicators dataset. Furthermore, we examined several country-level sociodemographic  
4  
5 information, including the population of children aged < 20 years, the gross domestic product  
6  
7 [GDP] per capita, unemployment rate, and poverty rate, using the OECD.Stat database.[25] We  
8  
9 examined data during 2000–2015, for which reliable data on both childhood obesity and social  
10  
11 spending were available. We excluded Lithuania from all analyses due to missing data in most  
12  
13  
14  
15 years.

## 19 **Measures**

### 21 Prevalence of childhood obesity

23  
24 We used the age-standardised prevalence (%) of childhood obesity among children aged 5 to 19  
25  
26 years (standardised to the WHO standard population), which has been estimated by sex using a  
27  
28 Bayesian hierarchical model based on the measured height and weight on 31.5 million  
29  
30 children.[21] Childhood obesity was defined as more than two standard deviations above the age  
31  
32 and sex-specific WHO growth reference median.[26]

### 37 Social spending on children

39  
40 Social spending on children was defined as the sum of (1) public social spending on family,  
41  
42 which includes benefits on family allowance, maternal and parental leave, ECEC, and others (the  
43  
44 components are shown in **eTable 1**),[22] and (2) public social spending on school education  
45  
46 (primary to post-secondary non-tertiary). Specifically, public social spending on family includes  
47  
48 (a) Child-related cash transfers to families with children, including income-tested child  
49  
50 allowances, public income support payments during periods of parental leave, and income  
51  
52 support for single-parent families; (b) public spending on services for families with children,  
53  
54  
55  
56  
57  
58  
59  
60

1  
2  
3 including the direct subsidisation of childcare and ECEC facilities, public childcare support  
4 through earmarked payments to parents, and home help services for families; (c) financial  
5 support for families via the tax system, including child tax allowances and tax credits.[27] Public  
6 social spending on school education includes direct expenditure on educational institutions (e.g.,  
7 public spending on instruction services, university research, and ancillary services such as meals  
8 and transport to schools) as well as education-related public subsidies given to households and  
9 administered by educational institutions.[23,28] Social spending on children was expressed as  
10 the purchasing power parity (PPP)-adjusted United States (US) dollars (fixed price, 2010 as the  
11 baseline year) per child aged < 20 years.  
12  
13  
14  
15  
16  
17  
18  
19  
20  
21  
22  
23  
24  
25

### 26 **Statistical analysis**

27  
28 Basic social characteristics derived across the included OECD countries in 2015 were: GDP per  
29 capita (PPP-adjusted US dollars), unemployment rate (for the total population), poverty rate (the  
30 ratio of the number of people aged 18–65 years whose income falls below half the median  
31 household income of the total population, before tax and transfer), and children aged < 20 years  
32 as a percentage of total population.  
33  
34  
35  
36  
37  
38  
39  
40  
41

42 Next, we cross-sectionally investigated the relationship between social spending on children and  
43 childhood obesity across OECD countries, using 2015 data. In doing so, we plotted the  
44 prevalence of childhood obesity against social spending on children and estimated the correlation  
45 between them using a Pearson's correlation. We also analysed the partial correlation between  
46 them, including three variables that could influence this relationship: GDP per capita,  
47 unemployment rate, and poverty rate. The analyses were separately conducted for each sex here  
48  
49  
50  
51  
52  
53  
54  
55  
56  
57  
58  
59  
60

1  
2  
3 (and hereafter) because the pattern of childhood obesity varied by sex across countries.[1] In this  
4  
5 analysis, we substituted the latest year data for Denmark, Poland, Netherlands, and New Zealand,  
6  
7 for which 2015 data on social spending were unavailable.  
8  
9

10  
11  
12 Then, we examined the longitudinal trends in social spending and childhood obesity during the  
13  
14 period 2000–2015. To account for the difference in economic growth by countries, we first  
15  
16 estimated the average annual growth in social spending on children adjusted by the growth in  
17  
18 GDP per capita for each country using linear regression (**eMethod 1**). Next, we illustrated the  
19  
20 association between the growth in social spending and childhood obesity by plotting the absolute  
21  
22 change in the prevalence of childhood obesity from 2000 to 2015 against the average annual  
23  
24 change in social spending on children for countries and estimating the correlation between them  
25  
26 using a Pearson's correlation. We then analysed the partial correlation between them, including  
27  
28 the unemployment rate and poverty rate. In this longitudinal analysis, we substituted the latest  
29  
30 year data/the earliest year data when the 2015/2000 data were unavailable.  
31  
32  
33  
34  
35  
36  
37

38 Finally, we aimed to examine which dimensions of social spending contributed to the  
39  
40 relationship between the change in social spending on children and the change in childhood  
41  
42 obesity. In doing so, we disaggregated social spending on children into five dimensions  
43  
44 following the OECD's datasets: family allowance, maternal and parental leave, ECEC, school  
45  
46 education, and other benefits. We estimated the average annual growth in social spending on  
47  
48 each category adjusted by the growth in GDP per capita for each country using linear regression  
49  
50 (**eMethod 1**). Then, we analysed a partial correlation of the change in childhood obesity with the  
51  
52 growth in spending on each of the dimensions, after removing the effect of the growth in  
53  
54  
55  
56  
57  
58  
59  
60

1  
2  
3 spending on all the other dimensions and the changes in the unemployment rate and poverty  
4 rate.[16] In this analysis, we examined 29 OECD countries for which information on all the  
5 dimensions of social spending on children were available (Denmark, Mexico, Netherlands, New  
6 Zealand, Poland, and the United States were excluded). All analyses were conducted using Stata  
7 version 15 (College Station, TX; StataCorp LLC.).  
8  
9  
10  
11  
12  
13  
14  
15  
16

### 17 **Patient and public involvement**

18  
19 The current study involved secondary use of publicly available aggregated data. The study did  
20 not involve patients and the public in any way and did not require ethics review.  
21  
22  
23  
24  
25

## 26 **RESULTS**

### 27 **Basic characteristics across OECD countries**

28  
29 PPP-adjusted GDP per capita varied across OECD countries in 2015, ranging from \$16,660 in  
30 Mexico to \$87,825 in Luxembourg (**Table 1**). The unemployment rate was 7.9% on average,  
31 ranging from 3.4% in Japan to 24.9% in Greece. The poverty rate was 20.0% on average,  
32 ranging from 8.8% in Switzerland to 29.9% in Ireland. Children aged < 20 years accounted for  
33 23.1% of the total population on average, ranging from 17.3% in Japan to 37.2% in Mexico.  
34  
35  
36  
37  
38  
39  
40  
41  
42  
43

### 44 **Cross-sectional analysis of social spending and childhood obesity**

45  
46 The prevalence of childhood obesity varied across OECD countries in 2015, lowest in Japan  
47 (1.7% for girls and 5.0% for boys) and highest in New Zealand (14.7% and 17.1%) with the US  
48 as an outlier (19.3% and 23.0%) (**Figure 1**). There was considerable variation in PPP-adjusted  
49 social spending on children. Luxemburg was the highest spender, with social spending on  
50  
51  
52  
53  
54  
55  
56  
57  
58  
59  
60

1  
2  
3 children amounting to \$24,350 per child. The lowest spender was Mexico, which spent \$1,901  
4 per child. When splitting countries into two groups (the upper versus lower half of the population  
5 proportion of children) and comparing social spending on children in 2015, there was no  
6  
7 substantial difference (mean \$10,785 versus \$8,586;  $p=0.18$  in Brunner-Munzel test). The  
8 relationship between social spending on children and the prevalence of childhood obesity was  
9  
10 moderate and inverse for girls (Pearson's  $r=-0.32$ ;  $p=0.06$ ) and boys ( $r=-0.35$ ;  $p=0.04$ ). Since  
11 the US appeared to be an outlier for childhood obesity, we conducted a post-hoc estimation of  
12 correlation coefficients by excluding the US data, but the associations were qualitatively  
13 unchanged ( $r=-0.37$ ;  $p=0.03$  for girls and  $r=-0.40$ ;  $p=0.02$  for boys). Estimation of partial  
14 correlation illustrates the inverse associations were stronger after we accounted for GDP per  
15 capita, unemployment rate, and poverty rate ( $\rho=-0.51$ ;  $p<0.01$  for girls and  $\rho=-0.43$ ;  $p=0.01$  for  
16 boys).

### 33 **Longitudinal analysis of social spending and childhood obesity**

34  
35 During the period 2000–2015, all countries experienced increases in the prevalence of childhood  
36 obesity, with the exception of girls in Denmark (**Figure 2**). When we examined the changes in  
37 social spending adjusted by the growth in GDP per capita and changes in the prevalence of  
38 childhood obesity, we observed a moderate inverse association between these variables for girls  
39 (Pearson's  $r=-0.49$ ;  $p<0.01$ ) and a weak inverse association for boys ( $r=-0.28$ ;  $p=0.10$ ). After  
40 we further accounted for the changes in the unemployment rate and poverty rate, the inverse  
41 associations were stronger for girls ( $\rho=-0.51$ ;  $p<0.01$ ) and boys ( $\rho=-0.42$ ;  $p=0.02$ ).

### 54 **Longitudinal analysis of disaggregated social spending and childhood obesity**



1  
2  
3 Patterns of spending on specific dimensions within the gross social spending figure varied  
4 considerably between countries (**Figure 3**). On average, 14.5% of social spending on children  
5 was used for family allowance, 6.4% for maternal and parental leave, 12.4% for ECEC, 56.2%  
6 for school education, and 10.4% for other benefits in 2015. When we focused on the specific  
7 dimensions of social spending (**Table 2**), we found a moderate inverse association between the  
8 change in spending on ECEC and in the prevalence of childhood obesity for girls (Partial  
9 correlation  $\rho=-0.44$ ;  $p=0.03$ ) and boys ( $\rho=-0.45$ ;  $p=0.03$ ). The inverse relationship between the  
10 change in spending on school education and the growth in childhood obesity was moderate for  
11 girls ( $\rho=-0.41$ ;  $p=0.04$ ), but weak and statistically insignificant for boys ( $\rho=-0.18$ ;  $p=0.48$ ).  
12  
13 Increasing social spending on family allowance had a weak inverse association with the growth  
14 in childhood obesity for both sexes, but we did not find statistical significance ( $\rho=-0.20$ ;  $p=0.34$   
15 for both sexes). The change in social spending on maternal leave and other benefits were not  
16 associated with the growth in the prevalence of childhood obesity for either sex.  
17  
18  
19  
20  
21  
22  
23  
24  
25  
26  
27  
28  
29  
30  
31  
32  
33  
34

## 35 DISCUSSION

36  
37 Among OECD countries, we found an inverse association between the growth in social spending  
38 on children and childhood obesity after adjusting for the growth in GDP per capita. This  
39 association persisted even when we accounted for the underlying difference in social factors that  
40 could drive social spending and childhood obesity, including the unemployment rate and poverty  
41 rate. What contributed most to this association was social spending on education: ECEC for both  
42 sexes, and social spending on school education also contributed notably for girls. Taken together,  
43 these results suggest that OECD countries whose social spending on children increase more tend  
44 to experience smaller increases in childhood obesity prevalence in a context where all countries  
45  
46  
47  
48  
49  
50  
51  
52  
53  
54  
55  
56  
57  
58  
59  
60

1  
2  
3 except Denmark showed increasing prevalence in childhood obesity. These findings may  
4  
5 highlight the importance of social protection programs as macrosocial determinants of childhood  
6  
7 obesity. This is the first study that has investigated the relationship between social spending on  
8  
9 children and childhood obesity.  
10  
11  
12  
13

14  
15 It is not clear why the inverse association between social spending and childhood obesity exist,  
16  
17 but the finding that the relationship between social spending on children and childhood obesity  
18  
19 varies by dimensions of social spending may help to determine the possible mechanisms of this  
20  
21 association. Specifically, it is notable that the inverse association with the growth in childhood  
22  
23 obesity was strongest for the increase in spending on education. Social spending on ECEC was  
24  
25 strongly associated with reduced obesity growth rates for both girls and boys, while school  
26  
27 education was strongly associated with reduced growth of obesity among girls. Spending on  
28  
29 education may enrich nutritional and physical activity environments that protect against obesity,  
30  
31 such as higher quality school meals,[29,30] limited access to energy-dense competitive foods and  
32  
33 beverages at school,[31,32] and better access to playing fields.[33] If the high-quality  
34  
35 educational environment is protective against childhood obesity, we might predict that public  
36  
37 ECEC spending would have a particularly important role since it will increase both quality (e.g.  
38  
39 through increasing staff-to-child ratios) and uptake (in a context where ECEC is not mandatory  
40  
41 in most OECD countries). For example, Norway is the highest ECEC spender, has mandatory  
42  
43 subsidized childcare from 1 year, and provides the highest quality of ECEC among developed  
44  
45 countries;[32] and has low growth in obesity rates within the OECD. This relationship with  
46  
47 public ECEC spending is particularly interesting since maternal employment and use of childcare  
48  
49 in the earliest years (largely financed privately) have been associated with higher rates of  
50  
51  
52  
53  
54  
55  
56  
57  
58  
59  
60

1  
2  
3 obesity.[34–36] Our finding supports the view that the reason early childcare is associated with  
4 obesity is that it is often lower quality and highly constrained,[36] suggesting the importance of  
5 public spending on high quality for reducing childhood obesity. In contrast, in the context of  
6 universal provision of school education, the school environment may be more important for girls  
7 than boys in influencing levels of physical activity.[37] Other possible mechanisms may be  
8 through children’s health literacy and socioeconomic conditions in the future resulting from  
9 public investments in education.[38] However, without further breakdown of categories of social  
10 spending, we can only provide plausible suggestions for what might account for these observed  
11 associations.

12  
13  
14  
15  
16  
17  
18  
19  
20  
21  
22  
23  
24  
25  
26 Among the other dimensions of social spending on children, we observed a weak inverse  
27 association with the increase in the family allowance for both girls and boys. These cash benefits  
28 mitigate household financial strain and food insecurity.[39] Reductions in financial strain leave  
29 more funds available for the purchase of healthy food (e.g., fruits and vegetables) and reduce the  
30 consumption of fast food, especially among socioeconomically disadvantaged  
31 households.[11,40] Moreover, financial stability may reduce household-level stressors and  
32 contribute to a reduction in childhood obesity through biological mechanisms (e.g., by  
33 moderating cortisol levels) or improved eating habits.[41]

34  
35  
36  
37  
38  
39  
40  
41  
42  
43  
44  
45  
46  
47 Our findings add to a body of work that has explored the relationship between social protection,  
48 especially social spending as its indicator, and population health outcomes. Bradley and  
49 colleagues demonstrated a link between public social spending and better population health  
50 measures in terms of life expectancy, infant mortality rate, and low birth weight across OECD  
51  
52  
53  
54  
55  
56  
57  
58  
59  
60

1  
2  
3 countries.[15] They also found similar associations in the US between social spending and better  
4 health outcomes, including the lower prevalence of adult obesity.[18] A study by Shim further  
5 found that social spending on children, especially spending on the family allowance, was  
6 associated with reduced infant mortality in OECD 19 countries.[24] In Canada, Ng and  
7 Muntaner found that indicators of welfare generosity, including social spending on  
8 postsecondary education, were associated with reduced mortality.[42] Our study would extend  
9 these previous studies by further focusing on childhood obesity, one of the top public health  
10 issues in the modern context, and therefore reinforce the key roles of social protection policies  
11 and social spending as their indicator in population health.  
12  
13  
14  
15  
16  
17  
18  
19  
20  
21  
22  
23  
24  
25

26 Our study has limitations. First, as in any ecological study unmeasured confounding will have  
27 influenced our findings. For example, countries that spend more of social spending for families,  
28 may also spend more on public health activities for the prevention of childhood obesity (e.g.,  
29 food labelling and sugar tax) or other social protection programs that can be protective against  
30 childhood obesity at the population level (e.g., housing and labour market programs).[43,44]  
31  
32 Second, our study was unable to identify the exact mechanisms through which social spending  
33 was inversely associated with childhood obesity, even though we broke down social spending  
34 into several dimensions. We did not have information on individual social policies (e.g., child  
35 care quality and availability or free school meals), and it was difficult to isolate the effect of  
36 individual social policies. Nevertheless, our findings suggest that public social spending in the  
37 broadest sense may be an important macro-level indicator of child health and wellbeing, such as  
38 childhood obesity. Future work should focus more directly on the impact of individual social  
39 policies on childhood obesity. Third, the change in social spending on children does not appear  
40  
41  
42  
43  
44  
45  
46  
47  
48  
49  
50  
51  
52  
53  
54  
55  
56  
57  
58  
59  
60

1  
2  
3 to explain all the variation of the growth in the prevalence of childhood obesity. For example,  
4 Japan, Belgium, and Denmark had a smaller growth in childhood obesity compared to the fitted  
5 lines, while several countries, including Hungary, Mexico, and Turkey, experienced a larger  
6 growth. Therefore, even when this association is causal, the effect of increasing social spending  
7 on children on the prevalence of childhood obesity in an individual country may differ by the  
8 country's characteristics such as economic inequalities and cultural factors related to food and  
9 physical activity. Fourth, our study captures obesity across a wide age range (5-19 years), while  
10 many of these policies are age dependent (e.g. school impacts are likely to be cumulative after  
11 school starting age). Fifth, our analysis did not include private social spending. Private social  
12 spending may act to partially counter the redistributive impact of public social spending.[45]  
13  
14 Further studies on how changes in the public and private mix in social spending may affect  
15 childhood obesity may be required.  
16  
17  
18  
19  
20  
21  
22  
23  
24  
25  
26  
27  
28  
29  
30  
31  
32

33 Our findings were based on OECD countries' data and might not be generalizable to low- and  
34 middle-income countries.  
35  
36  
37  
38  
39

40 In summary, we found that OECD countries whose social spending on children increased more  
41 tended to experience a smaller increase in childhood obesity. This association appeared to be  
42 explained mainly by the change in social spending on early childhood education and care and  
43 school education. Our findings may highlight the importance of social spending as a macrosocial  
44 indicator in childhood obesity.  
45  
46  
47  
48  
49  
50  
51  
52  
53  
54  
55  
56  
57  
58  
59  
60

## FUNDING

A.M. was supported by Japan Society for the Promotion of Science (18J13078). C.E. was supported by a mobility award from the University of Leeds.

## AUTHOR CONTRIBUTIONS

A.M. and C.E. conceived the study design. A.M. analysed data. A.M., C.E., P.L., and Y.K. interpreted the data. All authors contributed to the draft manuscript and have approved the final version.

## DATA STATEMENT

The datasets are available from the following websites: NCD-RisC datasets (<http://ncdrisc.org>), OECD SOCX datasets (<https://www.oecd.org/social/expenditure.htm>), and the public spending on education datasets ([https://www.oecd-ilibrary.org/education/public-spending-on-education/indicator/english\\_f99b45d0-en](https://www.oecd-ilibrary.org/education/public-spending-on-education/indicator/english_f99b45d0-en)).

## CONFLICTS OF INTEREST

The authors have no conflicts of interest to disclose.

## REFERENCES

- 1 Ng M, Fleming T, Robinson M, *et al.* Global, regional, and national prevalence of overweight and obesity in children and adults during 1980–2013: a systematic analysis for the Global Burden of Disease Study 2013. *Lancet* 2014;**384**:766–81. doi:10.1016/S0140-6736(14)60460-8
- 2 Wang LY, Chyen D, Lee S, *et al.* The Association between body mass index in adolescence and obesity in adulthood. *J Adolesc Health* 2008;**42**:512–8. doi:10.1016/j.jadohealth.2007.10.010
- 3 Reilly JJ, Kelly J. Long-term impact of overweight and obesity in childhood and adolescence on morbidity and premature mortality in adulthood: systematic review. *Int J Obes* 2011;**35**:891–8. doi:10.1038/ijo.2010.222
- 4 Strand BH, Kuh D, Shah I, *et al.* Childhood, adolescent and early adult body mass index in relation to adult mortality: results from the British 1946 birth cohort. *J Epidemiol Community Health* 2012;**66**:225–32. doi:10.1136/jech.2010.110155
- 5 Daniels SR, Arnett DK, Eckel RH, *et al.* Overweight in children and adolescents: Pathophysiology, consequences, prevention, and treatment. *Circulation* 2005;**111**:1999–2012. doi:10.1161/01.CIR.0000161369.71722.10
- 6 Cawley J. The Economics of childhood obesity. *Health Aff (Millwood)* 2010;**29**:364–71. doi:10.1377/hlthaff.2009.0721
- 7 Popkin BM, Kim S, Rusev ER, *et al.* Measuring the full economic costs of diet, physical activity and obesity-related chronic diseases. *Obes Rev* 2006;**7**:271–93. doi:10.1111/j.1467-789X.2006.00230.x
- 8 Lobstein T, Jackson-Leach R, Moodie ML, *et al.* Child and adolescent obesity: Part of a bigger picture. *Lancet* 2015;**385**:2510–20. doi:10.1016/S0140-6736(14)61746-3
- 9 Swinburn B, Egger G, Raza F. Dissecting obesogenic environments: The development and application of a framework for identifying and prioritizing environmental interventions for obesity. *Preventive Medicine* 1999;**29**:563–70. doi:10.1006/pmed.1999.0585
- 10 Bammann K, Gwozdz W, Lanfer A, *et al.* Socioeconomic factors and childhood overweight in Europe: results from the multi-centre IDEFICS study: Socioeconomic factors and childhood overweight. *Pediatr Obes* 2013;**8**:1–12. doi:10.1111/j.2047-6310.2012.00075.x
- 11 Ueda P, Kondo N, Fujiwara T. The global economic crisis, household income and pre-adolescent overweight and underweight: a nationwide birth cohort study in Japan. *Int J Obes* 2015;**39**:1414–20. doi:10.1038/ijo.2015.90
- 12 Townshend T, Lake A. Obesogenic environments: current evidence of the built and food environments. *Perspect Public Health* 2017;**137**:38–44. doi:10.1177/1757913916679860

- 1  
2  
3 13 World Health Organization. Report of the Commission on Ending Childhood Obesity:  
4 implementation plan. Geneva: 2017. [http://apps.who.int/gb/ebwha/pdf\\_files/WHA70/A70\\_31-](http://apps.who.int/gb/ebwha/pdf_files/WHA70/A70_31-en.pdf)  
5 [en.pdf](http://apps.who.int/gb/ebwha/pdf_files/WHA70/A70_31-en.pdf)  
6  
7  
8 14 Lundberg O, Yngwe MÅ, Stjärne MK, *et al.* The role of welfare state principles and  
9 generosity in social policy programmes for public health: an international comparative study.  
10 *Lancet* 2008;**372**:1633–40. doi:10.1016/S0140-6736(08)61686-4  
11  
12 15 Bradley EH, Elkins BR, Herrin J, *et al.* Health and social services expenditures:  
13 associations with health outcomes. *BMJ Qual Saf* 2011;**20**:826–31.  
14 doi:10.1136/bmjqs.2010.048363  
15  
16 16 Papanicolas I, Woskie LR, Orlander D, *et al.* The Relationship between health spending  
17 and social spending In high-income countries: How does the US compare? *Health Aff*  
18 *(Millwood)* 2019;**38**:1567–75. doi:10.1377/hlthaff.2018.05187  
19  
20 17 OECD. OECD Data: Social spending. 2019. doi:10.1787/soc\_glance-2019-en  
21  
22 18 Bradley EH, Canavan M, Rogan E, *et al.* Variation in health outcomes: The role of  
23 spending on social services, public health, and health care, 2000–09. *Health Aff (Millwood)*  
24 2016;**35**:760–8. doi:10.1377/hlthaff.2015.0814  
25  
26 19 Griffith R, von Hinke S, Smith S. Getting a healthy start: The effectiveness of targeted  
27 benefits for improving dietary choices. *J Health Econ* 2018;**58**:176–87.  
28 doi:10.1016/j.jhealeco.2018.02.009  
29  
30 20 Majdzadeh R, Taghdisi M-H, Jazayeri S, *et al.* Effect of school-based interventions to  
31 control childhood obesity: A review of reviews. *Int J Prev Med* 2015;**6**:68. doi:10.4103/2008-  
32 7802.162059  
33  
34 21 Worldwide trends in body-mass index, underweight, overweight, and obesity from 1975  
35 to 2016: a pooled analysis of 2416 population-based measurement studies in 128·9 million  
36 children, adolescents, and adults. *Lancet* 2017;**390**:2627–42. doi:10.1016/S0140-  
37 6736(17)32129-3  
38  
39 22 OECD. Social Expenditure Database (SOCX).  
40 2019.<https://www.oecd.org/social/expenditure.htm> (accessed 20 Aug 2020).  
41  
42 23 OECD. Public spending on education (indicator). Published Online First: 2019.doi:  
43 10.1787/f99b45d0-en (accessed 20 Aug 2020).  
44  
45 24 Shim J. Social welfare expenditures and infant mortality. *Social Work in Public Health*  
46 2015;**30**:567–77. doi:10.1080/19371918.2015.1073648  
47  
48 25 OECD. OECD.Stat. 2019.<https://doi.org/10.1787/data-00285-en> (accessed 20 Aug 2020).  
49  
50 26 de Onis M. Development of a WHO growth reference for school-aged children and  
51 adolescents. *Bull World Health Organ* 2007;**85**:660–7. doi:10.2471/BLT.07.043497  
52  
53  
54  
55  
56  
57  
58  
59  
60



- 1  
2  
3  
4 27 OECD. PF1.1: Public spending on family benefits.  
5 [http://www.oecd.org/els/soc/PF1\\_1\\_Public\\_spending\\_on\\_family\\_benefits.pdf](http://www.oecd.org/els/soc/PF1_1_Public_spending_on_family_benefits.pdf) (accessed 25  
6 Aug 2020).
- 7  
8 28 OECD. Indicator B1: How much is spent per student? In: *Education at a Glance 2014: OECD Indicators*. 2014. [http://www.oecd.org/education/EAG2014-Indicator%20B1%20\(eng\).pdf](http://www.oecd.org/education/EAG2014-Indicator%20B1%20(eng).pdf) (accessed 25 Aug 2020).
- 9  
10  
11  
12 29 Miyawaki A, Lee JS, Kobayashi Y. Impact of the school lunch program on overweight  
13 and obesity among junior high school students: a nationwide study in Japan. *J Pub Health*  
14 2019;**41**:362–70. doi:10.1093/pubmed/fdy095
- 15  
16 30 Jaime PC, Lock K. Do school based food and nutrition policies improve diet and reduce  
17 obesity? *Preventive Medicine* 2009;**48**:45–53. doi:10.1016/j.ypmed.2008.10.018
- 18  
19 31 Council of School Health, Committee on Nutrition. Snacks, Sweetened Beverages,  
20 Added Sugars, and Schools. *Pediatrics* 2015;**135**:575–83. doi:10.1542/peds.2014-3902
- 21  
22 32 World Health Organization. School policy framework: Implementation of the WHO  
23 global strategy on diet, physical activity and health. Geneva: 2008.  
24 <http://www.who.int/dietphysicalactivity/SPF-en-2008.pdf>
- 25  
26 33 World Health Organization. Promoting physical activity in schools: An important  
27 element of a health-promoting school.  
28 2007. [https://apps.who.int/iris/bitstream/handle/10665/43733/9789241595995\\_eng.pdf?sequence=1&isAllowed=y](https://apps.who.int/iris/bitstream/handle/10665/43733/9789241595995_eng.pdf?sequence=1&isAllowed=y) (accessed 10 Aug 2020).
- 29  
30  
31  
32 34 Pearce A, Li L, Abbas J, *et al*. Is childcare associated with the risk of overweight and  
33 obesity in the early years? Findings from the UK Millennium Cohort Study. *Int J Obes*  
34 2010;**34**:1160–8. doi:10.1038/ijo.2010.15
- 35  
36 35 Hawkins SS, Cole TJ, Law C, *et al*. Maternal employment and early childhood  
37 overweight: findings from the UK Millennium Cohort Study. *Int J Obes* 2008;**32**:30–8.  
38 doi:10.1038/sj.ijo.0803682
- 39  
40  
41 36 Swyden K, Sisson SB, Lora K, *et al*. Association of childcare arrangement with  
42 overweight and obesity in preschool-aged children: a narrative review of literature. *Int J Obes*  
43 2017;**41**:1–12. doi:10.1038/ijo.2016.198
- 44  
45 37 Jago R, Anderson C, Baranowski T, *et al*. Adolescent patterns of physical activity.  
46 Differences by gender, day, and time of day. *Am J Prev Med* 2005;**28**:447–52.  
47 doi:10.1016/j.amepre.2005.02.007
- 48  
49  
50 38 Ruel MT, Alderman H. Nutrition-sensitive interventions and programmes: how can they  
51 help to accelerate progress in improving maternal and child nutrition? *Lancet* 2013;**382**:536–  
52 51. doi:10.1016/S0140-6736(13)60843-0
- 53  
54  
55  
56  
57  
58  
59  
60

- 1  
2  
3 39 Lucas PJ, Jessiman T, Cameron A. Healthy Start: The use of welfare food vouchers by  
4 low-income parents in England. *Soc Policy Soc* 2015;**14**:457–69.  
5 doi:10.1017/S1474746415000020  
6  
7  
8 40 Mellis AM, Athamneh LN, Stein JS, *et al*. Less is more: Negative income shock  
9 increases immediate preference in cross commodity discounting and food demand. *Appetite*  
10 2018;**129**:155–61. doi:10.1016/j.appet.2018.06.032  
11  
12 41 Gundersen C, Lohman BJ, Garasky S, *et al*. Food Security, Maternal Stressors, and  
13 Overweight Among Low-Income US Children: Results From the National Health and  
14 Nutrition Examination Survey (1999–2002). *Pediatrics* 2008;**122**:e529–40.  
15 doi:10.1542/peds.2008-0556  
16  
17 42 Ng E, Muntaner C. Welfare generosity and population health among Canadian provinces:  
18 a time-series cross-sectional analysis, 1989–2009. *J Epidemiol Community Health*  
19 2015;**69**:970–7. doi:10.1136/jech-2014-205385  
20  
21  
22 43 Kirkpatrick SI, Tarasuk V. Housing circumstances are associated with household food  
23 access among low-income urban families. *J Urban Health* 2011;**88**:284–96.  
24 doi:10.1007/s11524-010-9535-4  
25  
26 44 Oddo VM, Nicholas LH, Bleich SN, *et al*. The impact of changing economic conditions  
27 on overweight risk among children in California from 2008 to 2012. *J Epidemiol Community*  
28 *Health* 2016;**70**:874–80. doi:10.1136/jech-2015-207117  
29  
30  
31 45 Goudswaard K, Caminada K. The redistributive effect of public and private social  
32 programmes: A cross-country empirical analysis. *International Social Security Review*  
33 2010;**63**:1–19. doi:10.1111/j.1468-246X.2009.01351.x  
34  
35  
36  
37  
38  
39  
40  
41  
42  
43  
44  
45  
46  
47  
48  
49  
50  
51  
52  
53  
54  
55  
56  
57  
58  
59  
60

**Table 1.** Characteristics of Organization for Economic Cooperation and Development 35 countries in 2015

| Country            | GDP per capita<br>(US dollars) | Unemployment<br>rate<br>(%) | Poverty<br>rate<br>(%) | Children aged < 20<br>(% of population) |
|--------------------|--------------------------------|-----------------------------|------------------------|-----------------------------------------|
| Australia          | 45,584                         | 6.1                         | 18.6                   | 25.1                                    |
| Austria            | 42,906                         | 5.7                         | 20.9                   | 19.7                                    |
| Belgium            | 40,900                         | 8.5                         | 24.5                   | 22.6                                    |
| Canada             | 42,498                         | 6.9                         | 20.0                   | 22.0                                    |
| Chile              | 20,789                         | 6.2                         | 14.5                   | 28.0                                    |
| Czech Republic     | 29,874                         | 5.0                         | 17.3                   | 19.7                                    |
| Denmark            | 44,760                         | 6.2                         | 18.7                   | 23.1                                    |
| Estonia            | 26,023                         | 6.2                         | 20.0                   | 20.6                                    |
| Finland            | 38,272                         | 9.4                         | 23.5                   | 21.9                                    |
| France             | 36,902                         | 10.4                        | 26.2                   | 24.6                                    |
| Germany            | 42,503                         | 4.6                         | 20.0                   | 18.4                                    |
| Greece             | 23,649                         | 24.9                        | 28.9                   | 19.4                                    |
| Hungary            | 24,254                         | 6.8                         | 24                     | 19.7                                    |
| Iceland            | 43,726                         | 4.0                         | 11.5                   | 27.0                                    |
| Ireland            | 58,229                         | 9.9                         | 29.9                   | 27.7                                    |
| Israel             | 31,221                         | 5.2                         | 18.8                   | 36.4                                    |
| Italy              | 33,164                         | 11.9                        | 23.9                   | 18.4                                    |
| Japan              | 37,036                         | 3.4                         | 18.4                   | 17.3                                    |
| Latvia             | 22,237                         | 9.9                         | 19.9                   | 19.4                                    |
| Luxembourg         | 87,825                         | 6.7                         | 25.0                   | 22.6                                    |
| Mexico             | 16,660                         | 4.3                         | 16.6                   | 37.2                                    |
| Netherlands        | 45,855                         | 6.9                         | 20.1                   | 22.6                                    |
| New Zealand        | 33,981                         | 5.4                         | 15.2                   | 26.8                                    |
| Norway             | 59,430                         | 4.3                         | 18.1                   | 24.4                                    |
| Poland             | 24,170                         | 7.5                         | 21.2                   | 20.4                                    |
| Portugal           | 26,677                         | 12.4                        | 22.9                   | 19.6                                    |
| Slovakia           | 28,423                         | 11.5                        | 16.8                   | 20.7                                    |
| Slovenia           | 28,203                         | 9.0                         | 21.4                   | 19.4                                    |
| South Korea        | 34,193                         | 3.6                         | 13.5                   | 20.1                                    |
| Spain              | 31,753                         | 22.1                        | 28.8                   | 19.8                                    |
| Sweden             | 44,832                         | 7.4                         | 14.5                   | 22.8                                    |
| Switzerland        | 54,453                         | 4.8                         | 8.8                    | 20.3                                    |
| Turkey             | 22,709                         | 10.2                        | 15.3                   | 32.7                                    |
| United Kingdom     | 38,723                         | 5.3                         | 20.8                   | 23.7                                    |
| United States (US) | 52,105                         | 5.3                         | 19.8                   | 25.7                                    |
| OECD 35 average    | 37,558                         | 7.9                         | 20.0                   | 23.1                                    |

GDP: gross domestic product. The GDP per capita was measured as purchasing power parity adjusted US dollars (fixed price, 2010 as the baseline year). Poverty rate show the ratio of the number of people aged 18–65 whose income falls below half the median household income of the total population, before tax and transfer.

1  
2  
3 **Figure 1.** Social spending on children and prevalence of childhood obesity by sex in the  
4 Organization for Economic Cooperation and Development (OECD) countries  
5  
6  
7

8 **Source:** Authors' analysis of data from OECD's Social Expenditure Database (SOCX), OECD  
9 Education statistics database, and NCD Risk Factor Collaboration (NCD-RisC) database.

10 **Notes:** Data are from 2015 for all countries apart from Denmark (2014), Poland (2014),  
11 Netherlands (2011), or New Zealand (2011). The x-axis shows the country-level social spending  
12 on children (including cash benefits and tax breaks for families with children, expenditure on  
13 childcare or other benefits in kind, and expenditure on primary and secondary education),  
14 measured as purchasing power parity (PPP)-adjusted US dollars (fixed price, 2010 as the  
15 baseline year) per child aged under 20 years. The y-axis indicates the country-level prevalence  
16 (%) of children aged 5–19 years categorized as obesity (body mass index > 2 standard deviations  
17 above the WHO growth reference for children). The lines of best fit show that countries whose  
18 governments spend more money on children tend to experience smaller percentages of childhood  
19 obesity for both sexes (Pearson's  $r = -0.32$ ;  $p = 0.06$  for girls and  $r = -0.35$ ;  $p = 0.04$  for boys).  
20  
21  
22  
23  
24  
25  
26  
27  
28  
29  
30  
31  
32  
33  
34  
35  
36  
37  
38  
39  
40  
41  
42  
43  
44  
45  
46  
47  
48  
49  
50  
51  
52  
53  
54  
55  
56  
57  
58  
59  
60

1  
2  
3 **Figure 2.** Changes in social spending on children and in the prevalence of childhood obesity  
4 from 2000 to 2015 in the Organization for Economic Cooperation and Development (OECD)  
5 countries  
6  
7  
8

9 **Source:** Authors' analysis of data from OECD's Social Expenditure Database (SOCX), OECD  
10 Education statistics database, and NCD Risk Factor Collaboration (NCD-RisC) database.

11 **Notes:** The x-axis shows the average annual change in social spending on children (PPP-adjusted  
12 US dollars per child) adjusted by the growth in GDP per capita during 2000–2015. The y-axis  
13 indicates the absolute change in the prevalence of childhood obesity from 2000 to 2015. The  
14 lines of best fit show that changes in social spending on children and the percentage of childhood  
15 obesity are inversely associated for both sexes (Pearson's  $r = -0.49$ ;  $p < 0.01$  for girls and  $r =$   
16  $-0.28$ ;  $p = 0.10$  for boys).  
17  
18  
19  
20  
21  
22  
23  
24  
25  
26  
27  
28  
29  
30  
31  
32  
33  
34  
35  
36  
37  
38  
39  
40  
41  
42  
43  
44  
45  
46  
47  
48  
49  
50  
51  
52  
53  
54  
55  
56  
57  
58  
59  
60

1  
2  
3 **Figure 3.** Specific dimensions of social spending on children in OECD countries compared with  
4 the OECD averages in 2015  
5  
6  
7

8 **Source:** Authors' analysis of data from Organization for Economic Cooperation and  
9 Development (OECD) Social Expenditure Database (SOCX).

10 **Notes:** Specific dimensions of social spending on children are shown for 29 OECD countries for  
11 which the information on all the dimensions of social spending on children are available  
12 (Denmark, Mexico, Netherlands, New Zealand, Poland, and the United States are excluded). The  
13 OECD mean is calculated for these 29 countries. ECEC: Early childhood education and care.  
14  
15  
16  
17  
18  
19  
20  
21  
22  
23  
24  
25  
26  
27  
28  
29  
30  
31  
32  
33  
34  
35  
36  
37  
38  
39  
40  
41  
42  
43  
44  
45  
46  
47  
48  
49  
50  
51  
52  
53  
54  
55  
56  
57  
58  
59  
60

**Table 2.** Correlation coefficients: Changes in social spending on children by changes in the prevalence of childhood obesity by dimensions of social spending (period 2000 to 2015)

| Types of social spending    | Partial correlation coefficients | P values |
|-----------------------------|----------------------------------|----------|
| <b><i>Girls</i></b>         |                                  |          |
| Family allowance            | −0.20                            | 0.34     |
| Maternal and parental leave | 0.06                             | 0.77     |
| ECEC                        | −0.44                            | 0.03     |
| Education                   | −0.41                            | 0.04     |
| Others                      | 0.09                             | 0.66     |
| <b><i>Boys</i></b>          |                                  |          |
| Family allowance            | −0.20                            | 0.34     |
| Maternal and parental leave | 0.08                             | 0.71     |
| ECEC                        | −0.45                            | 0.03     |
| Education                   | −0.18                            | 0.48     |
| Others                      | 0                                | 0.98     |

The analyses were conducted for 31 countries. South Korea, Luxembourg, Mexico, and United States of America were excluded because of the average annual change in either dimension of social spending or the average annual change in unemployment rate or poverty rate cannot be calculated because data for more than two years are not available.

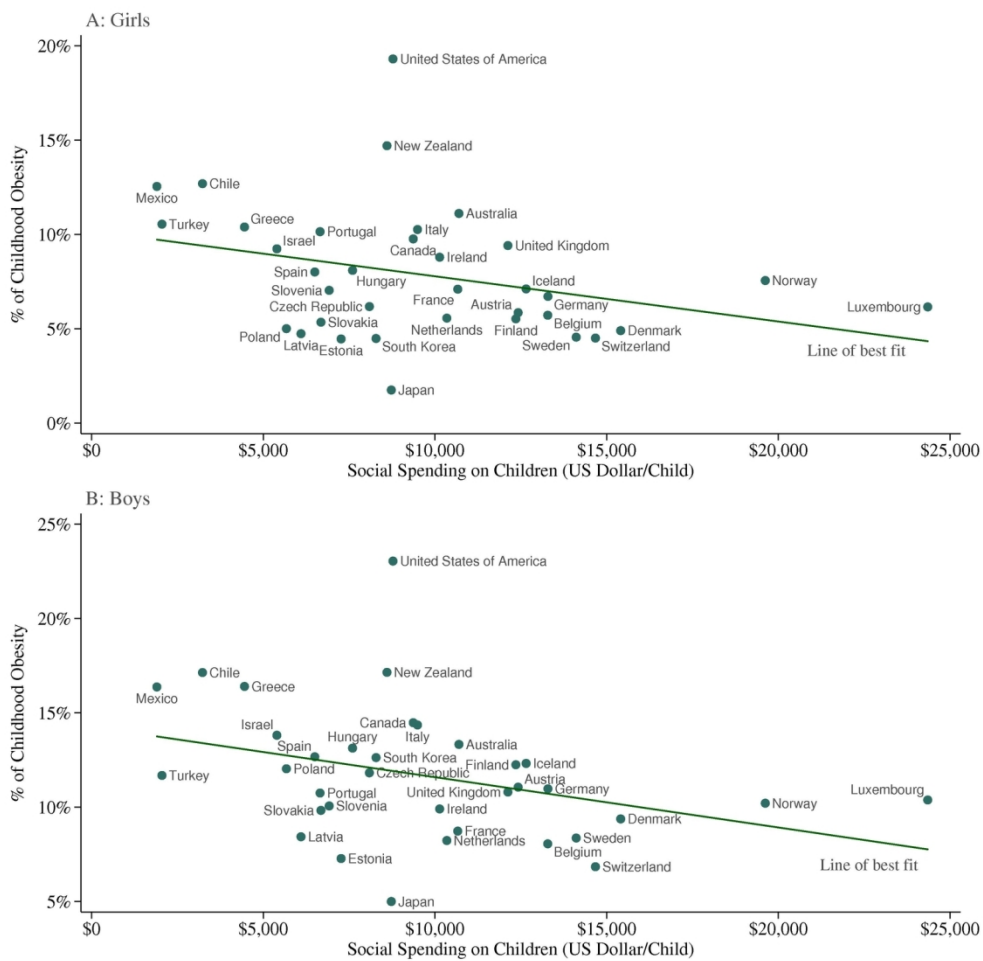

Figure 1. Social spending on children and prevalence of childhood obesity by sex in the Organization for Economic Cooperation and Development (OECD) countries

Source: Authors' analysis of data from OECD's Social Expenditure Database (SOCX), OECD Education statistics database, and NCD Risk Factor Collaboration (NCD-RisC) database.

Notes: Data are from 2015 for all countries apart from Denmark (2014), Poland (2014), Netherlands (2011), or New Zealand (2011). The x-axis shows the country-level social spending on children (including cash benefits and tax breaks for families with children, expenditure on childcare or other benefits in kind, and expenditure on primary and secondary education), measured as purchasing power parity (PPP)-adjusted US dollars (fixed price, 2010 as the baseline year) per child aged under 20 years. The y-axis indicates the country-level prevalence (%) of children aged 5–19 years categorized as obesity (body mass index > 2 standard deviations above the WHO growth reference for children). The lines of best fit show that countries whose governments spend more money on children tend to experience smaller percentages of childhood obesity for both sexes (Pearson's  $r = -0.32$ ;  $p = 0.06$  for girls and  $r = -0.35$ ;  $p = 0.04$  for boys).

139x139mm (300 x 300 DPI)



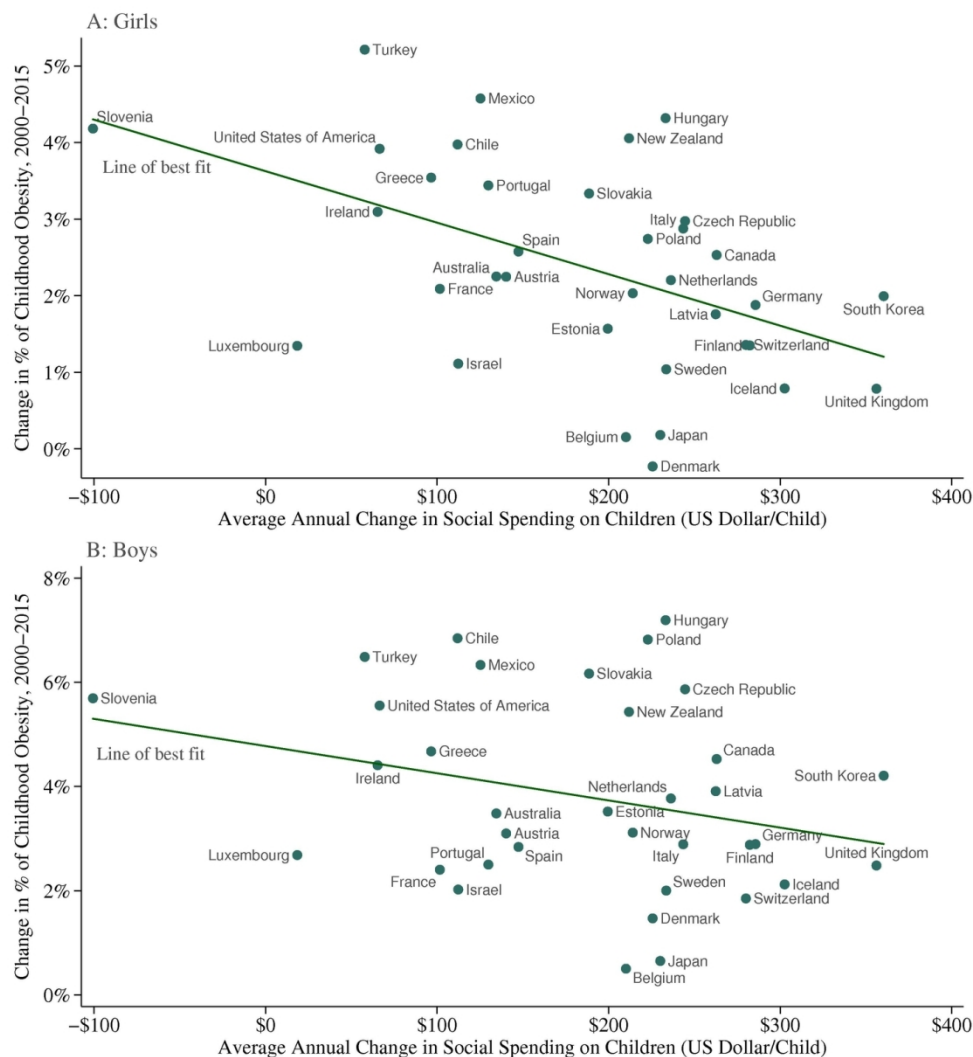

Figure 2. Changes in social spending on children and in the prevalence of childhood obesity from 2000 to 2015 in the Organization for Economic Cooperation and Development (OECD) countries

Source: Authors' analysis of data from OECD's Social Expenditure Database (SOCX), OECD Education statistics database, and NCD Risk Factor Collaboration (NCD-RisC) database.

Notes: The x-axis shows the average annual change in social spending on children (PPP-adjusted US dollars per child) adjusted by the growth in GDP per capita during 2000–2015. The y-axis indicates the absolute change in the prevalence of childhood obesity from 2000 to 2015. The lines of best fit show that changes in social spending on children and the percentage of childhood obesity are inversely associated for both sexes (Pearson's  $r = -0.49$ ;  $p < 0.01$  for girls and  $r = -0.28$ ;  $p = 0.10$  for boys).

127x139mm (300 x 300 DPI)

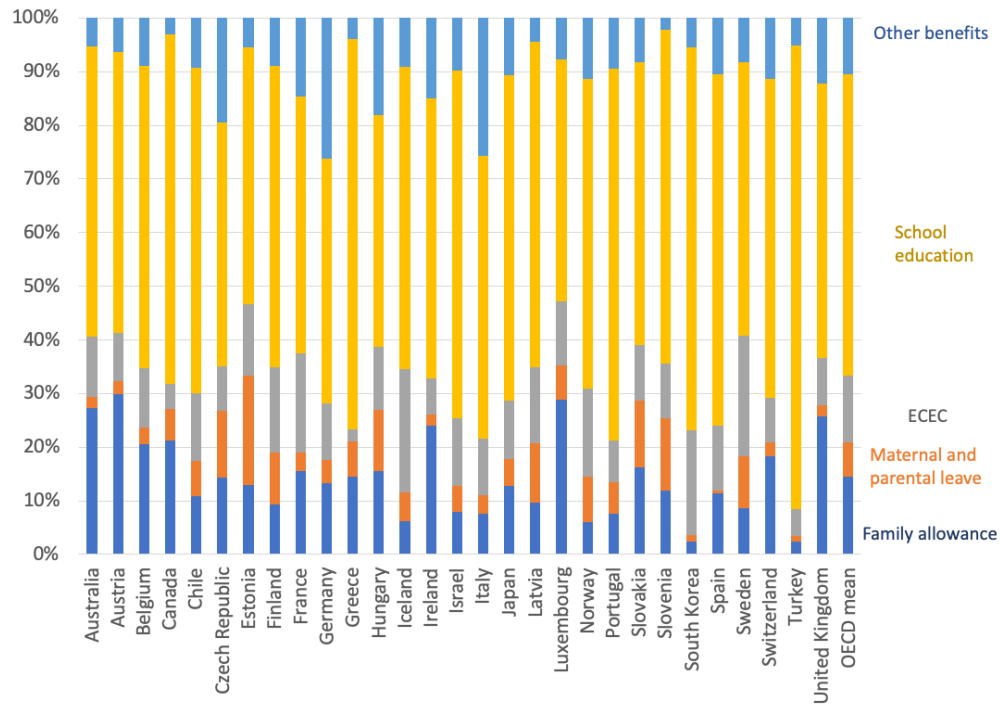

Figure 3. Specific dimensions of social spending on children in OECD countries compared with the OECD averages in 2015

Source: Authors' analysis of data from Organization for Economic Cooperation and Development (OECD) Social Expenditure Database (SOCX).

Notes: Specific dimensions of social spending on children are shown for 29 OECD countries for which the information on all the dimensions of social spending on children are available (Denmark, Mexico, Netherlands, New Zealand, Poland, and the United States are excluded). The OECD mean is calculated for these 29 countries. ECEC: Early childhood education and care.

254x190mm (108 x 108 DPI)

## Appendix

**Relationships between Social Spending and Childhood Obesity in High-Income Countries:  
More Welfare, Less Obesity?**

**eTable 1. Details of each dimension in social spending on family**

| <b>Dimensions</b>                                                           | <b>Details</b>                                                                                                                         |
|-----------------------------------------------------------------------------|----------------------------------------------------------------------------------------------------------------------------------------|
| <b>Family allowances<br/>(Cash benefits / Tax<br/>break)</b>                | Family allowance                                                                                                                       |
|                                                                             | Family income supplement                                                                                                               |
|                                                                             | Family allowance supplement                                                                                                            |
|                                                                             | Basic family payment                                                                                                                   |
|                                                                             | Additional family payment                                                                                                              |
|                                                                             | Home child care allowance                                                                                                              |
|                                                                             | Family tax payment                                                                                                                     |
|                                                                             | Family tax benefit (Part A and B)                                                                                                      |
|                                                                             | More help for families—one-off payments                                                                                                |
|                                                                             | Parenting payment (Single and Partnered)                                                                                               |
|                                                                             | Single Income Family Bonus (2008)                                                                                                      |
|                                                                             | Back to School Bonus (2008)                                                                                                            |
|                                                                             | Economic Security Strategy (2008)                                                                                                      |
|                                                                             | Single Income Family Supplement                                                                                                        |
| Schoolkids Bonus                                                            |                                                                                                                                        |
| <b>Maternity and parental<br/>leave<br/>(Cash benefits / Tax<br/>break)</b> | Maternity allowances                                                                                                                   |
|                                                                             | Maternity immunization allowance                                                                                                       |
|                                                                             | Baby Bonus (previously Maternity payment)                                                                                              |
|                                                                             | Parental Leave Pay                                                                                                                     |
|                                                                             | Dad and Partner Pay                                                                                                                    |
|                                                                             | Stillborn Baby Payment                                                                                                                 |
| <b>Early childhood education<br/>and care (ECEC)<br/>(Benefits in kind)</b> | National Partnerships on Early Childhood Education and<br>Care - National Occasional Care                                              |
|                                                                             | Support for the Child Care System - Child Care<br>Communications Campaign                                                              |
|                                                                             | Child care support                                                                                                                     |
|                                                                             | Child care for eligible parents undergoing training                                                                                    |
|                                                                             | Support for child care                                                                                                                 |
|                                                                             | Support for child care: specific purpose payment                                                                                       |
|                                                                             | Child care benefit                                                                                                                     |
|                                                                             | Child care (pre-primary education)                                                                                                     |
|                                                                             | Child care (pre-primary education - 4-5yo)                                                                                             |
|                                                                             | Child Care Tax Rebate                                                                                                                  |
|                                                                             | Support for the Child Care System - Child Care Services<br>Support                                                                     |
|                                                                             | Support for the Child Care System - Job Education and<br>Training                                                                      |
|                                                                             | Child Care Fee Assistance - Child Care Benefit                                                                                         |
|                                                                             | Child Care Fee Assistance - Child Care Rebate                                                                                          |
|                                                                             | National Partnerships on Early Childhood Education and<br>Care - Indigenous Early Childhood Development Children<br>and Family Centers |
|                                                                             | National Partnerships on Early Childhood Education and<br>Care - TAFE Fee Waivers for Child Care Qualifications                        |
|                                                                             | National Partnerships on Early Childhood Education and<br>Care - National Quality Agenda                                               |

|                                           |                                                                           |
|-------------------------------------------|---------------------------------------------------------------------------|
|                                           | State/Territory Child Care Expenditure                                    |
|                                           | National Partnership on Universal Access to Early Childhood Education     |
|                                           | Early Childhood Education - 4 and 5 year olds in ISCED 1 (Primary school) |
| <b>Others (Cash benefits / Tax break)</b> | Supporting parent's benefit                                               |
|                                           | Sole parents pension                                                      |
|                                           | Partner allowance (pension)                                               |
|                                           | Parenting allowance                                                       |
|                                           | Assistance for Isolated Children                                          |
| <b>Others (Benefits in kind)</b>          | Home help / Accommodation                                                 |
|                                           | Parenting                                                                 |
|                                           | Family support services scheme                                            |
|                                           | Child abuse prevention                                                    |
|                                           | Family violence partnership                                               |
|                                           | Family violence regional activities                                       |
|                                           | Grants to family relationship support organizations                       |
|                                           | Indigenous parenting and family well-being                                |
|                                           | National illicit drug strategy                                            |
|                                           | Services for families with children                                       |
|                                           | Stronger families and communities strategy: families initiative           |
|                                           | Services for families with children: specific purpose payment             |
|                                           | Pre-school education                                                      |
|                                           | Family and child welfare - State and Territory                            |
|                                           | Child protection and out-of-home care services - State and Territory      |
|                                           | Family Support                                                            |
|                                           | Find and Connect                                                          |
|                                           | Families and Children                                                     |

Source: OECD's Social Expenditure Database (SOCX).

**eMethod 1. Technical appendix**

I regressed the average annual growth in social spending on the average annual growth in GDP per capita and calculated the residuals. Then, I calibrated them by adding the average of annual growth in social spending so that “cross-national mean of adjusted average annual growth in social spending” = “cross-national mean of unadjusted average annual growth in social spending.”

For peer review only

# Reporting checklist for cross sectional study.

Based on the STROBE cross sectional guidelines.

## Instructions to authors

Complete this checklist by entering the page numbers from your manuscript where readers will find each of the items listed below.

Your article may not currently address all the items on the checklist. Please modify your text to include the missing information. If you are certain that an item does not apply, please write "n/a" and provide a short explanation.

Upload your completed checklist as an extra file when you submit to a journal.

In your methods section, say that you used the STROBE cross sectional reporting guidelines, and cite them as:

von Elm E, Altman DG, Egger M, Pocock SJ, Gøtzsche PC, Vandenbroucke JP. The Strengthening the Reporting of Observational Studies in Epidemiology (STROBE) Statement: guidelines for reporting observational studies.

|                           |                     | Reporting Item                                                                                  | Page Number |
|---------------------------|---------------------|-------------------------------------------------------------------------------------------------|-------------|
| <b>Title and abstract</b> |                     |                                                                                                 |             |
| Title                     | <a href="#">#1a</a> | Indicate the study's design with a commonly used term in the title or the abstract              | 1           |
| Abstract                  | <a href="#">#1b</a> | Provide in the abstract an informative and balanced summary of what was done and what was found | 3           |
| <b>Introduction</b>       |                     |                                                                                                 |             |
| Background / rationale    | <a href="#">#2</a>  | Explain the scientific background and rationale for the investigation being reported            | 6-7         |
| Objectives                | <a href="#">#3</a>  | State specific objectives, including any prespecified hypotheses                                | 7-8         |
| <b>Methods</b>            |                     |                                                                                                 |             |
| Study design              | <a href="#">#4</a>  | Present key elements of study design early in the paper                                         | 8           |
| Setting                   | <a href="#">#5</a>  | Describe the setting, locations, and relevant dates, including periods of                       | 8           |

|    |                      |                                                                                                |     |
|----|----------------------|------------------------------------------------------------------------------------------------|-----|
| 1  |                      | recruitment, exposure, follow-up, and data collection                                          |     |
| 2  |                      |                                                                                                |     |
| 3  | Eligibility criteria | <a href="#">#6a</a> Give the eligibility criteria, and the sources and methods of selection of | 8   |
| 4  |                      | participants.                                                                                  |     |
| 5  |                      |                                                                                                |     |
| 6  |                      | <a href="#">#7</a> Clearly define all outcomes, exposures, predictors, potential               | 9   |
| 7  |                      | confounders, and effect modifiers. Give diagnostic criteria, if applicable                     |     |
| 8  |                      |                                                                                                |     |
| 9  |                      |                                                                                                |     |
| 10 | Data sources /       | <a href="#">#8</a> For each variable of interest give sources of data and details of methods   | 8-9 |
| 11 | measurement          | of assessment (measurement). Describe comparability of assessment                              |     |
| 12 |                      | methods if there is more than one group. Give information separately                           |     |
| 13 |                      | for for exposed and unexposed groups if applicable.                                            |     |
| 14 |                      |                                                                                                |     |
| 15 |                      |                                                                                                |     |
| 16 |                      |                                                                                                |     |
| 17 | Bias                 | <a href="#">#9</a> Describe any efforts to address potential sources of bias                   | 11  |
| 18 |                      |                                                                                                |     |
| 19 | Study size           | <a href="#">#10</a> Explain how the study size was arrived at                                  | 8   |
| 20 |                      |                                                                                                |     |
| 21 | Quantitative         | <a href="#">#11</a> Explain how quantitative variables were handled in the analyses. If        | 11  |
| 22 | variables            | applicable, describe which groupings were chosen, and why                                      |     |
| 23 |                      |                                                                                                |     |
| 24 |                      |                                                                                                |     |
| 25 | Statistical          | <a href="#">#12a</a> Describe all statistical methods, including those used to control for     | 11  |
| 26 | methods              | confounding                                                                                    |     |
| 27 |                      |                                                                                                |     |
| 28 |                      |                                                                                                |     |
| 29 | Statistical          | <a href="#">#12b</a> Describe any methods used to examine subgroups and interactions           | N/A |
| 30 | methods              |                                                                                                |     |
| 31 |                      |                                                                                                |     |
| 32 |                      |                                                                                                |     |
| 33 | Statistical          | <a href="#">#12c</a> Explain how missing data were addressed                                   | 11  |
| 34 | methods              |                                                                                                |     |
| 35 |                      |                                                                                                |     |
| 36 |                      |                                                                                                |     |
| 37 | Statistical          | <a href="#">#12d</a> If applicable, describe analytical methods taking account of sampling     | N/A |
| 38 | methods              | strategy                                                                                       |     |
| 39 |                      |                                                                                                |     |
| 40 |                      |                                                                                                |     |
| 41 | Statistical          | <a href="#">#12e</a> Describe any sensitivity analyses                                         | 13  |
| 42 | methods              |                                                                                                |     |
| 43 |                      |                                                                                                |     |
| 44 |                      |                                                                                                |     |
| 45 | <b>Results</b>       |                                                                                                |     |
| 46 |                      |                                                                                                |     |
| 47 | Participants         | <a href="#">#13a</a> Report numbers of individuals at each stage of study—eg numbers           | 12  |
| 48 |                      | potentially eligible, examined for eligibility, confirmed eligible,                            |     |
| 49 |                      | included in the study, completing follow-up, and analysed. Give                                |     |
| 50 |                      | information separately for for exposed and unexposed groups if                                 |     |
| 51 |                      | applicable.                                                                                    |     |
| 52 |                      |                                                                                                |     |
| 53 |                      |                                                                                                |     |
| 54 |                      |                                                                                                |     |
| 55 | Participants         | <a href="#">#13b</a> Give reasons for non-participation at each stage                          | 12  |
| 56 |                      |                                                                                                |     |
| 57 | Participants         | <a href="#">#13c</a> Consider use of a flow diagram                                            | N/A |
| 58 |                      |                                                                                                |     |
| 59 |                      |                                                                                                |     |
| 60 |                      |                                                                                                |     |

|    |                    |                      |                                                                                                                                                                                                                   |       |
|----|--------------------|----------------------|-------------------------------------------------------------------------------------------------------------------------------------------------------------------------------------------------------------------|-------|
| 1  | Descriptive data   | <a href="#">#14a</a> | Give characteristics of study participants (eg demographic, clinical, social) and information on exposures and potential confounders. Give information separately for exposed and unexposed groups if applicable. | 12    |
| 2  |                    |                      |                                                                                                                                                                                                                   |       |
| 3  |                    |                      |                                                                                                                                                                                                                   |       |
| 4  |                    |                      |                                                                                                                                                                                                                   |       |
| 5  |                    |                      |                                                                                                                                                                                                                   |       |
| 6  | Descriptive data   | <a href="#">#14b</a> | Indicate number of participants with missing data for each variable of interest                                                                                                                                   | 12    |
| 7  |                    |                      |                                                                                                                                                                                                                   |       |
| 8  |                    |                      |                                                                                                                                                                                                                   |       |
| 9  |                    |                      |                                                                                                                                                                                                                   |       |
| 10 | Outcome data       | <a href="#">#15</a>  | Report numbers of outcome events or summary measures. Give information separately for exposed and unexposed groups if applicable.                                                                                 | 12-13 |
| 11 |                    |                      |                                                                                                                                                                                                                   |       |
| 12 |                    |                      |                                                                                                                                                                                                                   |       |
| 13 |                    |                      |                                                                                                                                                                                                                   |       |
| 14 | Main results       | <a href="#">#16a</a> | Give unadjusted estimates and, if applicable, confounder-adjusted estimates and their precision (eg, 95% confidence interval). Make clear which confounders were adjusted for and why they were included          | 13-14 |
| 15 |                    |                      |                                                                                                                                                                                                                   |       |
| 16 |                    |                      |                                                                                                                                                                                                                   |       |
| 17 |                    |                      |                                                                                                                                                                                                                   |       |
| 18 |                    |                      |                                                                                                                                                                                                                   |       |
| 19 | Main results       | <a href="#">#16b</a> | Report category boundaries when continuous variables were categorized                                                                                                                                             | N/A   |
| 20 |                    |                      |                                                                                                                                                                                                                   |       |
| 21 | Main results       | <a href="#">#16c</a> | If relevant, consider translating estimates of relative risk into absolute risk for a meaningful time period                                                                                                      | N/A   |
| 22 |                    |                      |                                                                                                                                                                                                                   |       |
| 23 |                    |                      |                                                                                                                                                                                                                   |       |
| 24 |                    |                      |                                                                                                                                                                                                                   |       |
| 25 | Other analyses     | <a href="#">#17</a>  | Report other analyses done—e.g., analyses of subgroups and interactions, and sensitivity analyses                                                                                                                 | 14    |
| 26 |                    |                      |                                                                                                                                                                                                                   |       |
| 27 |                    |                      |                                                                                                                                                                                                                   |       |
| 28 |                    |                      |                                                                                                                                                                                                                   |       |
| 29 | <b>Discussion</b>  |                      |                                                                                                                                                                                                                   |       |
| 30 |                    |                      |                                                                                                                                                                                                                   |       |
| 31 | Key results        | <a href="#">#18</a>  | Summarise key results with reference to study objectives                                                                                                                                                          | 14    |
| 32 |                    |                      |                                                                                                                                                                                                                   |       |
| 33 |                    |                      |                                                                                                                                                                                                                   |       |
| 34 | Limitations        | <a href="#">#19</a>  | Discuss limitations of the study, taking into account sources of potential bias or imprecision. Discuss both direction and magnitude of any potential bias.                                                       | 17    |
| 35 |                    |                      |                                                                                                                                                                                                                   |       |
| 36 |                    |                      |                                                                                                                                                                                                                   |       |
| 37 |                    |                      |                                                                                                                                                                                                                   |       |
| 38 |                    |                      |                                                                                                                                                                                                                   |       |
| 39 | Interpretation     | <a href="#">#20</a>  | Give a cautious overall interpretation considering objectives, limitations, multiplicity of analyses, results from similar studies, and other relevant evidence.                                                  | 14-17 |
| 40 |                    |                      |                                                                                                                                                                                                                   |       |
| 41 |                    |                      |                                                                                                                                                                                                                   |       |
| 42 |                    |                      |                                                                                                                                                                                                                   |       |
| 43 |                    |                      |                                                                                                                                                                                                                   |       |
| 44 | Generalisability   | <a href="#">#21</a>  | Discuss the generalisability (external validity) of the study results                                                                                                                                             | 18    |
| 45 |                    |                      |                                                                                                                                                                                                                   |       |
| 46 |                    |                      |                                                                                                                                                                                                                   |       |
| 47 | <b>Other</b>       |                      |                                                                                                                                                                                                                   |       |
| 48 | <b>Information</b> |                      |                                                                                                                                                                                                                   |       |
| 49 |                    |                      |                                                                                                                                                                                                                   |       |
| 50 |                    |                      |                                                                                                                                                                                                                   |       |
| 51 | Funding            | <a href="#">#22</a>  | Give the source of funding and the role of the funders for the present study and, if applicable, for the original study on which the present article is based                                                     | 19    |
| 52 |                    |                      |                                                                                                                                                                                                                   |       |
| 53 |                    |                      |                                                                                                                                                                                                                   |       |
| 54 |                    |                      |                                                                                                                                                                                                                   |       |
| 55 |                    |                      |                                                                                                                                                                                                                   |       |

The STROBE checklist is distributed under the terms of the Creative Commons Attribution License CC-BY.

This checklist was completed on 26. August 2020 using <https://www.goodreports.org/>, a tool made by the

[EQUATOR Network](#) in collaboration with [Penelope.ai](#)

For peer review only - <http://bmjopen.bmj.com/site/about/guidelines.xhtml>



# BMJ Open

## Relationships between Social Spending and Childhood Obesity in OECD Countries: More Welfare, Less Obesity?

|                                 |                                                                                                                                                                                                                                                                                                                                                                  |
|---------------------------------|------------------------------------------------------------------------------------------------------------------------------------------------------------------------------------------------------------------------------------------------------------------------------------------------------------------------------------------------------------------|
| Journal:                        | <i>BMJ Open</i>                                                                                                                                                                                                                                                                                                                                                  |
| Manuscript ID                   | bmjopen-2020-044205.R1                                                                                                                                                                                                                                                                                                                                           |
| Article Type:                   | Original research                                                                                                                                                                                                                                                                                                                                                |
| Date Submitted by the Author:   | 01-Feb-2021                                                                                                                                                                                                                                                                                                                                                      |
| Complete List of Authors:       | Miyawaki, Atsushi; The University of Tokyo, Department of Public Health, Graduate School of Medicine<br>Evans, Charlotte; University of Leeds, School of Food Science and Nutrition<br>Lucas, Patricia; University of Bristol, School for Policy Studies<br>Kobayashi, Yasuki; The University of Tokyo, Department of Public Health, Graduate School of Medicine |
| <b>Primary Subject Heading</b>: | Global health                                                                                                                                                                                                                                                                                                                                                    |
| Secondary Subject Heading:      | Paediatrics, Public health, Nutrition and metabolism, Health policy                                                                                                                                                                                                                                                                                              |
| Keywords:                       | SOCIAL MEDICINE, Community child health < PAEDIATRICS, Health policy < HEALTH SERVICES ADMINISTRATION & MANAGEMENT, International health services < HEALTH SERVICES ADMINISTRATION & MANAGEMENT                                                                                                                                                                  |
|                                 |                                                                                                                                                                                                                                                                                                                                                                  |

SCHOLARONE™  
Manuscripts



I, the Submitting Author has the right to grant and does grant on behalf of all authors of the Work (as defined in the below author licence), an exclusive licence and/or a non-exclusive licence for contributions from authors who are: i) UK Crown employees; ii) where BMJ has agreed a CC-BY licence shall apply, and/or iii) in accordance with the terms applicable for US Federal Government officers or employees acting as part of their official duties; on a worldwide, perpetual, irrevocable, royalty-free basis to BMJ Publishing Group Ltd ("BMJ") its licensees and where the relevant Journal is co-owned by BMJ to the co-owners of the Journal, to publish the Work in this journal and any other BMJ products and to exploit all rights, as set out in our [licence](#).

The Submitting Author accepts and understands that any supply made under these terms is made by BMJ to the Submitting Author unless you are acting as an employee on behalf of your employer or a postgraduate student of an affiliated institution which is paying any applicable article publishing charge ("APC") for Open Access articles. Where the Submitting Author wishes to make the Work available on an Open Access basis (and intends to pay the relevant APC), the terms of reuse of such Open Access shall be governed by a Creative Commons licence – details of these licences and which [Creative Commons](#) licence will apply to this Work are set out in our licence referred to above.

Other than as permitted in any relevant BMJ Author's Self Archiving Policies, I confirm this Work has not been accepted for publication elsewhere, is not being considered for publication elsewhere and does not duplicate material already published. I confirm all authors consent to publication of this Work and authorise the granting of this licence.

1  
2  
3 **Relationships between Social Spending and Childhood Obesity in OECD Countries: More**  
4  
5 **Welfare, Less Obesity?**  
6  
7  
8  
9

10 Atsushi Miyawaki, MD, PhD<sup>1,2</sup>

11 Charlotte E.L. Evans, PhD<sup>3</sup>

12 Patricia J. Lucas, PhD<sup>4</sup>

13 Yasuki Kobayashi, MD, PhD<sup>1</sup>  
14  
15  
16  
17  
18  
19  
20  
21

22 **Affiliations**

23  
24 <sup>1</sup> Department of Public Health, Graduate School of Medicine, The University of Tokyo,  
25  
26 1130033, Japan

27  
28 <sup>2</sup> Health Services Research and Development Center, University of Tsukuba, 3050006, Japan

29  
30 <sup>3</sup> Nutritional Sciences and Epidemiology, School of Food Science and Nutrition, University of  
31  
32 Leeds, LS2 9JT, UK

33  
34 <sup>4</sup> Child Health Research, School for Policy Studies, University of Bristol, BS8 1TZ, UK  
35  
36  
37  
38  
39

40 **Running title:** Social Spending and Childhood Obesity  
41  
42  
43  
44

45 **Corresponding author:**

46 Atsushi Miyawaki, MD, PhD

47 Assistant Professor

48 Department of Public Health, Graduate School of Medicine, The University of Tokyo

49 7-3-1 Hongo, Bunkyo-ku, Tokyo, 1130033, Japan  
50  
51  
52  
53  
54  
55  
56  
57  
58  
59  
60

1  
2  
3 Email: amiyawaki-ky@umin.ac.jp  
4

5 Phone: +81-3-5841-3494  
6  
7  
8  
9

10 **Word count:** 3,954 words  
11

12 **Number of tables:** 3  
13

14 **Number of figures:** 2  
15  
16  
17  
18  
19  
20  
21  
22  
23  
24  
25  
26  
27  
28  
29  
30  
31  
32  
33  
34  
35  
36  
37  
38  
39  
40  
41  
42  
43  
44  
45  
46  
47  
48  
49  
50  
51  
52  
53  
54  
55  
56  
57  
58  
59  
60

For peer review only

**ABSTRACT** (300 words)

**Objectives:** The burden of childhood obesity is clustered among children in low-socioeconomic groups. Social spending on children—public welfare expenditure on families and education—may curb childhood obesity by reducing socioeconomic disadvantages. The objective of this study was to examine the relationship between social spending on children and childhood obesity across the Organization for Economic Cooperation and Development (OECD) countries.

**Design:** Ecological study.

**Setting:** Data on social spending on children were obtained from the OECD Social Expenditure Database and the OECD educational finance indicators dataset during 2000–2015. Data on childhood obesity were obtained from the NCD Risk Factor Collaboration database.

**Participants:** Aggregated statistics on obesity among children aged 5 to 19 years, estimated for OECD 35 countries based on the measured height and weight on 31.5 million children.

**Outcome Measures:** Country-level prevalence of obesity among children aged 5 to 19 years.

**Results:** In cross-sectional analyses in 2015, social spending on children was inversely associated with the prevalence of childhood obesity after adjusting for potential confounders (the gross domestic product per capita, unemployment rate, poverty rate, percentage of children aged < 20 years and prevalence of childhood obesity in 2000). In addition, when we focused on changes from 2000 to 2015, an average annual increase of 100 US dollars in social spending per child was associated with a decrease in childhood obesity by 0.6 percentage points for girls ( $p = 0.007$ ) and 0.7 percentage points for boys ( $p = 0.04$ ) between 2000 and 2015, after adjusting for the potential confounders. The dimensions of social spending that contributed to these

1  
2  
3 associations between the changes in social spending on children and childhood obesity were  
4  
5 early childhood education and care (ECEC) and school education for girls and ECEC for boys.  
6

7  
8 **Conclusion:** Countries that increase social spending on children tend to experience smaller  
9  
10 increases in childhood obesity.  
11

12  
13  
14 **Keywords:** Social medicine; Community child health; Health policy; International health  
15  
16 services  
17  
18  
19  
20  
21  
22  
23  
24  
25  
26  
27  
28  
29  
30  
31  
32  
33  
34  
35  
36  
37  
38  
39  
40  
41  
42  
43  
44  
45  
46  
47  
48  
49  
50  
51  
52  
53  
54  
55  
56  
57  
58  
59  
60

## ARTICLE SUMMARY

### Strengths and limitations of this study

- This is the first study that has investigated the relationship between public social spending on children and childhood obesity in the Organization for Economic Cooperation and Development (OECD) countries.
- We further focused on which dimensions of public social spending contributed most to these relationships.
- We did not focus on content and generosity of individual social policies nor private social spending. Future work should focus more on the impact of individual social policies on childhood obesity.
- Although our sample included high- and higher middle-income countries, findings were based on OECD countries' data and might not be generalizable to countries outside of this group.

## INTRODUCTION

The prevalence of childhood obesity has almost doubled in high-income countries during the last two decades. Current estimates suggest nearly one in ten children are obese.[1] Obesity in early life is an urgent public health issue due to its subsequent health consequences, including adult obesity,[2] early onset of non-communicable diseases,[3] premature death [3,4], and its influence on children's psychosocial development.[5] Childhood obesity is considered to have substantial economic burdens at the societal and individual level,[6,7]. Policymakers are increasingly responding to this growing public health crisis.

Although the proximal causes of this epidemic of obesity primarily are in individual behaviours such as higher consumption of food high in fat and sugar and increased sedentary behaviour,[8] these factors are shaped by upstream determinants related to socioeconomic conditions and the obesogenic environment.[9] Several studies have demonstrated that low-socioeconomic status of households is a risk factor for childhood obesity.[10,11] For example, those with both less education and lower family income are more likely to consume highly obesogenic fast foods.[12] Recognizing such social determinants of obesity, the World Health Organization (WHO) has recently recommended improving access to high-quality food in disadvantaged families in tandem with policies including taxation on unhealthy food and nutritional labels.[13] Besides these public health interventions, another possible approach is to reduce socioeconomic disadvantage itself, through social protection (e.g., income supplements for families and public investments in education).[14] Although there is a growing literature on the importance of social protection on adult obesity,[15–17] less attention has been paid to the roles of such social



1  
2  
3 protection policies in childhood obesity prevention. This gap partly relates to the difficulty of  
4  
5 estimating social spending at the individual level.  
6  
7  
8  
9

10 Although all high-income countries have social protection programs, there are large cross-  
11  
12 national variations in their generosity.[18,19] *Social spending*—how much the government  
13  
14 spends on social protection [20]—has been considered as an indicator to quantitatively gauge the  
15  
16 generosity of social protection programs in a country or region. Several studies have recently  
17  
18 recognized the importance of social spending as an indicator of macrosocial determinants of  
19  
20 health and demonstrated the association between social spending and better population health  
21  
22 outcomes including life expectancy, infant mortality, and low birth weight.[18,21] If the same  
23  
24 macrosocial determinants are drivers of childhood obesity, increasing social spending on  
25  
26 children will similarly operate as an upstream approach to curb childhood obesity. The possible  
27  
28 mechanisms may include tax credits and paid parental leave, that increase or stabilize household  
29  
30 income, or food vouchers offered to low-income families, which enable them to improve the  
31  
32 quality of family meals.[22] Higher quality nutritional and physical education at school also  
33  
34 encourages children to have a healthier diet and to be more active.[23] However, little is known  
35  
36 so far about the relationship between gross public social spending on children and childhood  
37  
38 obesity.  
39  
40  
41  
42  
43  
44  
45  
46

47 To bridge this knowledge gap, in this study, we sought to answer the following questions using  
48  
49 data from the Organization for Economic Cooperation and Development (OECD) countries.  
50

51 First, is social spending on children associated with the prevalence of childhood obesity?

52  
53  
54 Second, if so, which types of social spending contribute to this association? In this study, we  
55  
56  
57  
58  
59  
60

1  
2  
3 focus on between-country differences, considering gross social spending as a macrosocial  
4 indicator. The mechanisms via which social spending may influence childhood obesity are  
5 numerous and, at the individual level, childhood obesity is likely better predicted by individual  
6 circumstance. To estimate the impact of macro-economic policies, we report on differences at  
7 this level.  
8  
9  
10  
11  
12  
13  
14  
15  
16

## 17 **METHODS**

### 18 **Study design and sample**

19 We conducted a panel data analysis of 35 OECD countries using the NCD Risk Factor  
20 Collaboration (NCD-RisC) database,[24] which provides trends of childhood obesity during  
21 1975–2016 in 200 countries. We examined social spending on children using (1) the OECD  
22 Social Expenditure Database (SOCX) [25] and (2) the OECD educational finance indicators  
23 dataset.[26] The SOCX database includes internationally comparable statistics on public social  
24 spending (“public” means “by the central, state, or local government” [20]) across 35 OECD  
25 countries. The spending is categorised into “old age,” “survivors,” “incapacity related,” “family,”  
26 “active labour market program,” “unemployment,” “housing,” and “other social policy areas.”  
27 We focused on the category “family” because this category is most likely to measure direct  
28 benefits to children.[27] Although we anticipate that children will benefit from indirect spending  
29 on, for example, unemployment programs and housing, including these categories would  
30 overestimate the sums reaching families with children. We did not include private social  
31 spending (“private” means that it came from other sources than the general government) because  
32 it was not available for most countries in the SOCX dataset. Although education is considered as  
33 an essential aspect of social spending,[19] spending on school education is not included in the  
34  
35  
36  
37  
38  
39  
40  
41  
42  
43  
44  
45  
46  
47  
48  
49  
50  
51  
52  
53  
54  
55  
56  
57  
58  
59  
60

1  
2  
3 SOCX datasets (early childhood education and care [ECEC] is included). Thus, we obtained  
4 information on public social spending on school education from the OECD's educational finance  
5 indicators dataset. Furthermore, we examined several country-level sociodemographic variables,  
6 including the population of children aged < 20 years, the gross domestic product [GDP] per  
7 capita, unemployment rate, and poverty rate, using the OECD.Stat database.[28] We examined  
8 data during 2000–2015, for which reliable data on both childhood obesity and social spending  
9 were available. We excluded Lithuania from all analyses due to missing data in most years.  
10  
11  
12  
13  
14  
15  
16  
17  
18  
19  
20

## 21 **Measures**

### 22 Outcome variable: Prevalence of childhood obesity

23  
24 We used the age-standardised prevalence (%) of childhood obesity among children aged 5 to 19  
25 years (standardised to the WHO standard population), which has been estimated by sex using a  
26 Bayesian hierarchical model based on the measured height and weight on 31.5 million  
27 children.[24] Childhood obesity was defined as more than two standard deviations above the age  
28 and sex-specific WHO growth reference median.[29]  
29  
30  
31  
32  
33  
34  
35  
36  
37  
38  
39

### 40 Exposure variable: Social spending on children

41  
42 Our primary exposure variable was total social spending on children, which was defined as the  
43 sum of (1) public social spending on family, which includes benefits on family allowance,  
44 maternal and parental leave, ECEC, and others (the components are shown in **online**  
45 **supplemental table Table S1**),[25] and (2) public social spending on school education (primary  
46 to post-secondary non-tertiary). Specifically, public social spending on family includes (a) Child-  
47 related cash transfers to families with children, including income-tested child allowances, public  
48  
49  
50  
51  
52  
53  
54  
55  
56  
57  
58  
59  
60

1  
2  
3 income support payments during periods of parental leave, and income support for single-parent  
4 families; (b) public spending on services for families with children, including the direct  
5 subsidisation of childcare and ECEC facilities, public childcare support through earmarked  
6 payments to parents, and home help services for families; (c) financial support for families via  
7 the tax system, including child tax allowances and tax credits.[30] Public social spending on  
8 school education includes direct expenditure on educational institutions (e.g., public spending on  
9 instruction services, university research, and ancillary services such as meals and transport to  
10 schools) as well as education-related public subsidies given to households and administered by  
11 educational institutions.[26,31] Social spending on children was expressed as the purchasing  
12 power parity (PPP)-adjusted United States (US) dollars (fixed price, 2010 as the baseline year)  
13 per child aged < 20 years.

14  
15  
16  
17  
18  
19  
20  
21  
22  
23  
24  
25  
26  
27  
28  
29  
30  
31 Our secondary exposure variables were five dimensions of social spending on children (family  
32 allowance, maternal and parental leave, ECEC, school education, and other benefits). This  
33 disaggregation of social spending on children was conducted following the OECD's datasets to  
34 examine which dimensions of social spending contributed to the relationship between the social  
35 spending on children and childhood obesity.

### 36 37 38 39 40 41 42 43 44 Adjustment variables

45  
46  
47 We adjusted for countries' demographics and the "baseline" prevalence of childhood obesity in  
48 2000. Demographics consisted of three economic indicators (GDP per capita, unemployment rate  
49 and poverty rate) and the percentage of children aged < 20 years, because these factors could  
50 affect both the social spending on children [19] and the prevalence of childhood obesity. The  
51  
52  
53  
54  
55  
56  
57  
58  
59  
60

1  
2  
3 “baseline” prevalence of childhood obesity was also included as countries that had suffered from  
4 high obesity prevalence in the past may invest more in social programs to mitigate against  
5 childhood obesity.  
6  
7  
8  
9

### 10 11 12 **Statistical analysis** 13

14 Basic social characteristics derived across the included OECD countries in 2015 were: GDP per  
15 capita (PPP-adjusted US dollars), unemployment rate (for the total population), poverty rate (the  
16 ratio of the number of people aged 18–65 years whose income falls below half the median  
17 household income of the total population, before tax and transfer), and children aged < 20 years  
18 as a percentage of total population.  
19  
20  
21  
22  
23  
24  
25  
26  
27

28 Next, we cross-sectionally investigated the relationship between total social spending on children  
29 and childhood obesity across OECD countries, using 2015 data. We plotted the prevalence of  
30 childhood obesity against social spending on children and estimated the correlation between  
31 them using a Pearson’s correlation. We also examined the association between them, by using a  
32 multivariable linear regression model that adjusted for the demographic indicators (GDP per  
33 capita, unemployment rate, poverty rate, and percentage of children aged < 20 years) in 2015,  
34 and the prevalence of childhood obesity in 2000. The analyses were separately conducted for  
35 each sex here (and hereafter) because the pattern of childhood obesity varied by sex across  
36 countries.[1] In this analysis, we substituted the latest year data for Denmark, Poland,  
37 Netherlands, and New Zealand, for which 2015 data on social spending were unavailable.  
38  
39  
40  
41  
42  
43  
44  
45  
46  
47  
48  
49  
50  
51  
52  
53  
54  
55  
56  
57  
58  
59  
60

1  
2  
3 Then, to effectively investigate the association between social spending on children and  
4 childhood obesity within the same country, we examined the longitudinal trends in total social  
5 spending on children and childhood obesity during the period 2000–2015. To account for the  
6 difference in economic growth by countries, we first estimated the average annual growth in  
7 social spending on children adjusted by the growth in GDP per capita for each country using  
8 linear regression (**online supplemental method S1**). Next, we illustrated the association  
9 between the growth in social spending and childhood obesity by plotting the absolute change in  
10 the prevalence of childhood obesity from 2000 to 2015 against the average annual change in  
11 social spending on children for countries and estimating the correlation between them using a  
12 Pearson's correlation. We then investigated the association between them, by using a  
13 multivariable linear regression model that adjusted for the changes in demographic indicators  
14 (unemployment rate, poverty rate, and percentage of children aged < 20 years) from 2000 to  
15 2015 and the prevalence of childhood obesity in 2000. In this longitudinal analysis, we  
16 substituted the latest year data/the earliest year data when the 2015/2000 data were unavailable.  
17  
18 Finally, we used the secondary exposure variables, by replacing total social spending on children  
19 with five dimensions of social spending on children (family allowance, maternal and parental  
20 leave, ECEC, school education, and other benefits), and repeated multivariable linear  
21 regressions.[16] In this analysis, we examined 29 OECD countries for which information on all  
22 the dimensions of social spending on children were available (Denmark, Mexico, Netherlands,  
23 New Zealand, Poland, and the United States were excluded). All analyses were conducted using  
24 Stata version 15 (College Station, TX; StataCorp LLC.).  $P < 0.05$  was considered as statistically  
25 significant.  
26  
27  
28  
29  
30  
31  
32  
33  
34  
35  
36  
37  
38  
39  
40  
41  
42  
43  
44  
45  
46  
47  
48  
49  
50  
51  
52  
53  
54  
55  
56  
57  
58  
59  
60

## Post-hoc analyses

To investigate potential heterogeneous effects according to economic development, we divided OECD countries in half according to GDP per capita in 2000 and repeated the regression analyses for each group (i.e., countries with lower vs countries with upper GDP per capita).

## Patient and public involvement

The current study involved secondary use of publicly available aggregated data. The study did not involve patients and the public in any way and did not require ethics review.

## RESULTS

### Basic characteristics across OECD countries

PPP-adjusted GDP per capita varied across OECD countries in 2015, ranging from \$16,660 in Mexico to \$87,825 in Luxembourg (**Table 1**). The unemployment rate was 7.9% on average, ranging from 3.4% in Japan to 24.9% in Greece. The poverty rate was 20.0% on average, ranging from 8.8% in Switzerland to 29.9% in Ireland. Children aged < 20 years accounted for 23.1% of the total population on average, ranging from 17.3% in Japan to 37.2% in Mexico.

### Cross-sectional analysis of social spending and childhood obesity

The prevalence of childhood obesity varied across OECD countries in 2015, lowest in Japan (1.7% for girls and 5.0% for boys) and highest in New Zealand (14.7% and 17.1%) with the US as an outlier (19.3% and 23.0%) (**Figure 1**). There was considerable variation in PPP-adjusted social spending on children. Luxemburg was the highest spender, with social spending on

1  
2  
3 children amounting to \$24,350 per child. The lowest spender was Mexico, which spent \$1,901  
4  
5 per child. When splitting countries into two groups (the upper versus lower half of the population  
6  
7 proportion of children) and comparing social spending on children in 2015, there was no  
8  
9 substantial difference (mean \$10,785 versus \$8,586;  $p=0.18$  in Brunner-Munzel test). The  
10  
11 relationship between social spending on children and the prevalence of childhood obesity was  
12  
13 moderate and inverse for girls (Pearson's  $r=-0.32$ ;  $p=0.06$ ) and boys ( $r=-0.35$ ;  $p=0.04$ ). Since  
14  
15 the US appeared to be an outlier for childhood obesity, we conducted a post-hoc estimation of  
16  
17 correlation coefficients by excluding the US data, but the associations were qualitatively  
18  
19 unchanged ( $r=-0.37$ ;  $p=0.03$  for girls and  $r=-0.40$ ;  $p=0.02$  for boys). After we adjusted for  
20  
21 potential confounders (**Table 2**), we found that countries with higher total social spending on  
22  
23 children experienced lower prevalence of childhood obesity ( $\beta = -0.3 \times 10^{-3}$ ;  $p = 0.01$  for girls  
24  
25 and  $\beta = -0.4 \times 10^{-3}$ ;  $p = 0.02$  for boys).

### 33 **Longitudinal analysis of social spending and childhood obesity**

34  
35 During the period 2000–2015, all countries experienced increases in the prevalence of childhood  
36  
37 obesity, with the exception of girls in Denmark (**Figure 2**). When we examined the changes in  
38  
39 social spending adjusted by the growth in GDP per capita and changes in the prevalence of  
40  
41 childhood obesity, we observed a moderate inverse association between these variables for girls  
42  
43 (Pearson's  $r=-0.49$ ;  $p<0.01$ ) and a weak inverse association for boys ( $r=-0.28$ ;  $p=0.10$ ). After  
44  
45 we adjusted for potential confounders (**Table 3**), we found that countries with greater increases  
46  
47 in total social spending on children also had smaller increases in the prevalence of childhood  
48  
49 obesity ( $\beta = -0.6 \times 10^{-2}$ ;  $p = 0.007$  for girls and  $\beta = -0.7 \times 10^{-2}$ ;  $p = 0.04$  for boys). These  
50  
51 estimates indicate that a 100 US dollars average annual increase (adjusted by PPP and GDP per  
52  
53  
54  
55  
56  
57  
58  
59  
60



1  
2  
3 capita) per child was associated with a decline in childhood obesity between 2000 and 2015 by  
4  
5 0.6% for girls and 0.7% for boys.  
6  
7  
8  
9

### 10 **Disaggregated social spending and childhood obesity**

11  
12 Patterns of spending on specific dimensions within the gross social spending figure varied  
13  
14 considerably between countries (**online supplemental figure S1**). On average, 14.5% of social  
15  
16 spending on children was used for family allowance, 6.4% for maternal and parental leave,  
17  
18 12.4% for ECEC, 56.2% for school education, and 10.4% for other benefits in 2015. When we  
19  
20 focused on the specific dimensions of social spending in cross-sectional analyses (**Table 2**), we  
21  
22 found no evidence that either dimension of social spending on children was associated with the  
23  
24 prevalence of childhood obesity. However, when we focused on the changes over time (**Table**  
25  
26 **3**), we found an inverse association between the change in spending on ECEC and in the  
27  
28 prevalence of childhood obesity for girls ( $\beta = -1.2 \times 10^{-2}$ ;  $p = 0.045$ ) and boys ( $\beta = -2.1 \times 10^{-2}$ ;  
29  
30  $p = 0.049$ ). We also found an inverse relationship between the change in spending on school  
31  
32 education and the growth in childhood obesity for girls ( $\beta = -1.1 \times 10^{-2}$ ;  $p = 0.01$ ), but not for  
33  
34 boys ( $\beta = -0.5 \times 10^{-2}$ ;  $p = 0.43$ ). The change in social spending on family allowance, maternal  
35  
36 leave and other benefits were not associated with the growth in the prevalence of childhood  
37  
38 obesity for either sex.  
39  
40  
41  
42  
43  
44  
45  
46

### 47 **Post-hoc analyses**

48  
49 In the stratified analyses according to GDP per capita in 2000, we found that the cross-sectional  
50  
51 inverse relationship between total social spending on children and prevalence of childhood  
52  
53 obesity was observed only in countries with higher GDP per capita ( $p=0.03$  for girls and  $p=0.04$   
54  
55  
56  
57  
58  
59  
60

1  
2  
3 for boys) (**online supplemental table S2**). In longitudinal analyses, the coefficients for the  
4  
5 association between the changes in total social spending and changes in the prevalence of  
6  
7 childhood obesity remained negative; however, they did not reach statistical significance  
8  
9 regardless of the level of GDP per capita and sex (**online supplemental table S3**).

## 14 **DISCUSSION**

15  
16 Among OECD countries, we found an inverse association between the growth in social spending  
17  
18 on children and childhood obesity, after accounting for the underlying difference in social factors  
19  
20 that could drive social spending and childhood obesity. What contributed most to this association  
21  
22 was social spending on education: ECEC for both sexes, and social spending on school education  
23  
24 also contributed notably for girls. These results suggest that OECD countries whose social  
25  
26 spending on children increase more tend to experience smaller increases in childhood obesity  
27  
28 prevalence in a context where all countries except Denmark showed increasing prevalence in  
29  
30 childhood obesity. These findings may highlight the importance of social protection programs as  
31  
32 macrosocial determinants of childhood obesity.

33  
34  
35  
36  
37  
38  
39  
40 It is not clear why the inverse association between social spending and childhood obesity exist,  
41  
42 but the finding that the relationship between social spending on children and childhood obesity  
43  
44 varies by dimensions of social spending may help to determine the possible mechanisms of this  
45  
46 association. Notably, social spending on ECEC was associated with reduced obesity growth rates  
47  
48 for both girls and boys. Moreover, school education was associated with reduced growth of  
49  
50 obesity among girls. Spending on these education categories may enrich nutritional and physical  
51  
52 activity environments that protect against obesity, such as higher quality school meals,[32,33]  
53  
54  
55  
56  
57  
58  
59  
60

1  
2  
3 limited access to energy-dense competitive foods and beverages at school,[34,35] and better  
4 access to playing fields.[36] Conversely, schools under financial pressures may adopt unhealthy  
5 food policy (sales or advertising of snack foods) in schools or cancel gym classes in order to  
6 improve school budgets.[37] If the high-quality educational environment is protective against  
7 childhood obesity, we might predict that public ECEC spending would have a particularly  
8 important role since it will increase both quality (e.g. through increasing staff-to-child ratios) and  
9 uptake (in a context where ECEC is not mandatory in most OECD countries). For example,  
10 Norway is the highest ECEC spender, has mandatory subsidized childcare from 1 year, and  
11 provides the highest quality of ECEC among developed countries;[35] and has low growth in  
12 obesity rates within the OECD. This relationship with public ECEC spending is particularly  
13 interesting since maternal employment and use of childcare in the earliest years (largely financed  
14 privately) have been associated with higher rates of obesity.[38–40] Our finding supports the  
15 view that the reason early childcare is associated with obesity is that it is often lower quality and  
16 highly constrained,[40] suggesting the importance of public spending on high quality care for  
17 reducing childhood obesity. In contrast, in the context of universal provision of school education,  
18 the school environment may be more important for girls than boys in influencing levels of  
19 physical activity.[41] However, this mechanism may depend on the social context; another study  
20 in the US showed that the protective effect of increased physical education on obesity was  
21 concentrated among boys because girls substituted physical education for other activities.[42]  
22 Other possible mechanisms may be through children's health literacy and socioeconomic  
23 conditions in the future resulting from public investments in education.[43] However, without  
24 further breakdown of categories of social spending, we can only provide plausible suggestions  
25 for what might account for these observed associations.  
26  
27  
28  
29  
30  
31  
32  
33  
34  
35  
36  
37  
38  
39  
40  
41  
42  
43  
44  
45  
46  
47  
48  
49  
50  
51  
52  
53  
54  
55  
56  
57  
58  
59  
60

### **Comparison with other studies**

Our findings add to a body of work that has explored the relationship between social protection, especially social spending as its indicator, and population health outcomes. Bradley and colleagues demonstrated a link between public social spending and better population health measures in terms of life expectancy, infant mortality rate, and low birth weight across OECD countries.[18] They also found similar associations in the US between social spending and better health outcomes, including the lower prevalence of adult obesity.[21] A study by Shim further found that social spending on children, especially spending on the family allowance, was associated with reduced infant mortality in OECD 19 countries.[27] In Canada, Ng and Muntaner found that indicators of welfare generosity, including social spending on postsecondary education, were associated with reduced mortality.[44] There is also a growing literature on the effect of social programmes and education on adult obesity.[15–17] Our study extends these previous studies by further focusing on childhood obesity, one of the top public health issues in the modern context, and therefore reinforces the key roles of social protection policies and social spending as their indicator in population health.

### **Strengths and limitations of this study**

This is the first study that has investigated the relationship between social spending on children and childhood obesity. We further focused on which dimensions of public social spending contributed most to these relationships. Moreover, we tested the association between social spending and childhood obesity more robustly by examining the association between longitudinal changes as well as cross-sectional relationships. This would have helped to adjust

1  
2  
3 for unobserved country-specific characteristics. For example, the fact that the US was a clear  
4 outlier in the cross-sectional analysis might be due to the country's traditional food and  
5 agricultural policies that encourages overconsumption.[45] These factors would have been  
6 effectively controlled for in the longitudinal analysis but not in the cross-sectional analysis.  
7  
8  
9  
10  
11

12  
13  
14 Our study has limitations. First, as in any ecological study unmeasured confounding will have  
15 influenced our findings. For example, countries that spend more of social spending for families,  
16 may also spend more on public health activities for the prevention of childhood obesity (e.g.,  
17 food labelling and sugar tax) or other social protection programs that can be protective against  
18 childhood obesity at the population level (e.g., housing and labour market programs).[46,47]  
19  
20  
21  
22  
23

24 Second, we analysed only 35 countries at most, which limits the number of possible adjustment  
25 variables that could be included in the regression analyses. Third, our study was unable to  
26 identify the exact mechanisms through which social spending was inversely associated with  
27 childhood obesity, even though we broke down social spending into several dimensions. We did  
28 not have information on individual social policies (e.g., child care quality and availability or free  
29 school meals), and it was difficult to isolate the effect of individual social policies. Nevertheless,  
30 our findings suggest that public social spending in the broadest sense may be an important  
31 macro-level indicator of child health and wellbeing, such as childhood obesity. Future work  
32 should focus more directly on the impact of individual social policies on childhood obesity.  
33  
34  
35  
36  
37  
38  
39  
40  
41  
42  
43  
44  
45

46 Fourth, the change in social spending on children does not appear to explain all the variation of  
47 the growth in the prevalence of childhood obesity. For example, Japan, Belgium, and Denmark  
48 had a smaller growth in childhood obesity compared to the fitted lines, while several countries,  
49 including Hungary, Mexico, and Turkey, experienced a larger growth. Therefore, even when this  
50  
51  
52  
53  
54  
55  
56  
57  
58  
59  
60

1  
2  
3 association is causal, the effect of increasing social spending on children on the prevalence of  
4 childhood obesity in an individual country may differ by the country's characteristics such as  
5 economic inequalities and cultural factors related to food and physical activity. Fifth, our study  
6 captures obesity across a wide age range (5-19 years), while many of these policies are age  
7 dependent (e.g. school impacts are likely to be cumulative after school starting age). Finally, our  
8 analysis did not include private social spending. Private social spending may act to partially  
9 counter the redistributive impact of public social spending.[48] Further studies on how changes  
10 in the public and private mix in social spending may affect childhood obesity may be required.  
11  
12  
13  
14  
15  
16  
17  
18  
19  
20  
21  
22  
23

24 Although our sample includes both high- and higher middle-income countries, findings were  
25 based on OECD countries' data and might not be generalizable to countries outside of this group.  
26  
27  
28  
29

## 30 **CONCLUSIONS**

31  
32  
33 In summary, we found that OECD countries with larger increases in social spending on children  
34 between 2000 and 2015 tended to experience a smaller increase in childhood obesity over the  
35 same period. This association appeared to be explained mainly by the change in social spending  
36 on early childhood education and care and school education. Our findings may highlight the  
37 importance of social spending as a macrosocial indicator in childhood obesity.  
38  
39  
40  
41  
42  
43  
44  
45  
46  
47  
48  
49  
50  
51  
52  
53  
54  
55  
56  
57  
58  
59  
60

## FUNDING

A.M. was supported by Japan Society for the Promotion of Science (18J13078 and 20K18956).

C.E. was supported by a mobility award from the University of Leeds (grant number is not applicable).

## AUTHOR CONTRIBUTIONS

A.M. and C.E. conceived the study design. A.M. analysed data. A.M., C.E., P.L., and Y.K. interpreted the data. All authors contributed to the draft manuscript and have approved the final version.

## DATA STATEMENT

The datasets are available from the following websites: NCD-RisC datasets (<http://ncdrisc.org>), OECD SOCX datasets (<https://www.oecd.org/social/expenditure.htm>), and the public spending on education datasets ([https://www.oecd-ilibrary.org/education/public-spending-on-education/indicator/english\\_f99b45d0-en](https://www.oecd-ilibrary.org/education/public-spending-on-education/indicator/english_f99b45d0-en)).

## CONFLICTS OF INTEREST

The authors have no conflicts of interest to disclose.

## REFERENCES

- 1 Ng M, Fleming T, Robinson M, *et al.* Global, regional, and national prevalence of overweight and obesity in children and adults during 1980–2013: a systematic analysis for the Global Burden of Disease Study 2013. *Lancet* 2014;**384**:766–81. doi:10.1016/S0140-6736(14)60460-8
- 2 Wang LY, Chyen D, Lee S, *et al.* The Association between body mass index in adolescence and obesity in adulthood. *J Adolesc Health* 2008;**42**:512–8. doi:10.1016/j.jadohealth.2007.10.010
- 3 Reilly JJ, Kelly J. Long-term impact of overweight and obesity in childhood and adolescence on morbidity and premature mortality in adulthood: systematic review. *Int J Obes* 2011;**35**:891–8. doi:10.1038/ijo.2010.222
- 4 Strand BH, Kuh D, Shah I, *et al.* Childhood, adolescent and early adult body mass index in relation to adult mortality: results from the British 1946 birth cohort. *J Epidemiol Community Health* 2012;**66**:225–32. doi:10.1136/jech.2010.110155
- 5 Daniels SR, Arnett DK, Eckel RH, *et al.* Overweight in children and adolescents: Pathophysiology, consequences, prevention, and treatment. *Circulation* 2005;**111**:1999–2012. doi:10.1161/01.CIR.0000161369.71722.10
- 6 Cawley J. The Economics of childhood obesity. *Health Aff (Millwood)* 2010;**29**:364–71. doi:10.1377/hlthaff.2009.0721
- 7 Popkin BM, Kim S, Rusev ER, *et al.* Measuring the full economic costs of diet, physical activity and obesity-related chronic diseases. *Obes Rev* 2006;**7**:271–93. doi:10.1111/j.1467-789X.2006.00230.x
- 8 Lobstein T, Jackson-Leach R, Moodie ML, *et al.* Child and adolescent obesity: Part of a bigger picture. *Lancet* 2015;**385**:2510–20. doi:10.1016/S0140-6736(14)61746-3
- 9 Swinburn B, Egger G, Raza F. Dissecting obesogenic environments: The development and application of a framework for identifying and prioritizing environmental interventions for obesity. *Preventive Medicine* 1999;**29**:563–70. doi:10.1006/pmed.1999.0585
- 10 Bammann K, Gwozdz W, Lanfer A, *et al.* Socioeconomic factors and childhood overweight in Europe: results from the multi-centre IDEFICS study: Socioeconomic factors and childhood overweight. *Pediatr Obes* 2013;**8**:1–12. doi:10.1111/j.2047-6310.2012.00075.x
- 11 Ueda P, Kondo N, Fujiwara T. The global economic crisis, household income and pre-adolescent overweight and underweight: a nationwide birth cohort study in Japan. *Int J Obes* 2015;**39**:1414–20. doi:10.1038/ijo.2015.90
- 12 Townshend T, Lake A. Obesogenic environments: current evidence of the built and food environments. *Perspect Public Health* 2017;**137**:38–44. doi:10.1177/1757913916679860



- 1  
2  
3 13 World Health Organization. Report of the Commission on Ending Childhood Obesity:  
4 implementation plan. Geneva: 2017. [http://apps.who.int/gb/ebwha/pdf\\_files/WHA70/A70\\_31-](http://apps.who.int/gb/ebwha/pdf_files/WHA70/A70_31-en.pdf)  
5 [en.pdf](http://apps.who.int/gb/ebwha/pdf_files/WHA70/A70_31-en.pdf)  
6  
7  
8 14 Lundberg O, Yngwe MÅ, Stjärne MK, *et al.* The role of welfare state principles and  
9 generosity in social policy programmes for public health: an international comparative study.  
10 *Lancet* 2008;**372**:1633–40. doi:10.1016/S0140-6736(08)61686-4  
11  
12 15 Levasseur P. Can social programs break the vicious cycle between poverty and obesity?  
13 Evidence from urban Mexico. *World Development* 2019;**113**:143–56.  
14 doi:10.1016/j.worlddev.2018.09.003  
15  
16 16 Nagano H, Puppim de Oliveira JA, Barros AK, *et al.* The ‘Heart Kuznets Curve’?  
17 Understanding the relations between economic development and cardiac conditions. *World*  
18 *Development* 2020;**132**:104953. doi:10.1016/j.worlddev.2020.104953  
19  
20 17 Etile F. Education policies and health inequalities: Evidence from changes in the  
21 distribution of Body Mass Index in France, 1981–2003. *Economics & Human Biology*  
22 2014;**13**:46–65. doi:10.1016/j.ehb.2013.01.002  
23  
24 18 Bradley EH, Elkins BR, Herrin J, *et al.* Health and social services expenditures:  
25 associations with health outcomes. *BMJ Qual Saf* 2011;**20**:826–31.  
26 doi:10.1136/bmjqs.2010.048363  
27  
28 19 Papanicolas I, Woskie LR, Orlander D, *et al.* The Relationship between health spending  
29 and social spending In high-income countries: How does the US compare? *Health Aff*  
30 *(Millwood)* 2019;**38**:1567–75. doi:10.1377/hlthaff.2018.05187  
31  
32 20 OECD. OECD Data: Social spending. 2019. doi:10.1787/soc\_glance-2019-en  
33  
34 21 Bradley EH, Canavan M, Rogan E, *et al.* Variation in health outcomes: The role of  
35 spending on social services, public health, and health care, 2000–09. *Health Aff (Millwood)*  
36 2016;**35**:760–8. doi:10.1377/hlthaff.2015.0814  
37  
38 22 Griffith R, von Hinke S, Smith S. Getting a healthy start: The effectiveness of targeted  
39 benefits for improving dietary choices. *J Health Econ* 2018;**58**:176–87.  
40 doi:10.1016/j.jhealeco.2018.02.009  
41  
42 23 Majdzadeh R, Taghdisi M-H, Jazayeri S, *et al.* Effect of school-based interventions to  
43 control childhood obesity: A review of reviews. *Int J Prev Med* 2015;**6**:68. doi:10.4103/2008-  
44 7802.162059  
45  
46 24 Worldwide trends in body-mass index, underweight, overweight, and obesity from 1975  
47 to 2016: a pooled analysis of 2416 population-based measurement studies in 128·9 million  
48 children, adolescents, and adults. *Lancet* 2017;**390**:2627–42. doi:10.1016/S0140-  
49 6736(17)32129-3  
50  
51  
52  
53  
54  
55  
56  
57  
58  
59  
60

- 1  
2  
3 25 OECD. Social Expenditure Database (SOCX).  
4 2019.<https://www.oecd.org/social/expenditure.htm> (accessed 20 Nov 2019).  
5  
6  
7 26 OECD. Public spending on education (indicator). Published Online First: 2019.doi:  
8 10.1787/f99b45d0-en (accessed 20 Nov 2011).  
9  
10 27 Shim J. Social welfare expenditures and infant mortality. *Social Work in Public Health*  
11 2015;**30**:567–77. doi:10.1080/19371918.2015.1073648  
12  
13 28 OECD. OECD.Stat. 2019.<https://doi.org/10.1787/data-00285-en> (accessed 20 Nov 2019).  
14  
15 29 de Onis M. Development of a WHO growth reference for school-aged children and  
16 adolescents. *Bull World Health Organ* 2007;**85**:660–7. doi:10.2471/BLT.07.043497  
17  
18 30 OECD. PF1.1: Public spending on family benefits.  
19 [http://www.oecd.org/els/soc/PF1\\_1\\_Public\\_spending\\_on\\_family\\_benefits.pdf](http://www.oecd.org/els/soc/PF1_1_Public_spending_on_family_benefits.pdf) (accessed 25  
20 Aug 2020).  
21  
22  
23 31 OECD. Indicator B1: How much is spent per student? In: *Education at a Glance 2014:*  
24 *OECD Indicators*. 2014. [http://www.oecd.org/education/EAG2014-](http://www.oecd.org/education/EAG2014-Indicator%20B1%20(eng).pdf)  
25 *Indicator%20B1%20(eng).pdf* (accessed 25 Aug 2020).  
26  
27 32 Miyawaki A, Lee JS, Kobayashi Y. Impact of the school lunch program on overweight  
28 and obesity among junior high school students: a nationwide study in Japan. *J Pub Health*  
29 2019;**41**:362–70. doi:10.1093/pubmed/fdy095  
30  
31  
32 33 Jaime PC, Lock K. Do school based food and nutrition policies improve diet and reduce  
33 obesity? *Preventive Medicine* 2009;**48**:45–53. doi:10.1016/j.ypmed.2008.10.018  
34  
35 34 Council of School Health, Committee on Nutrition. Snacks, Sweetened Beverages,  
36 Added Sugars, and Schools. *Pediatrics* 2015;**135**:575–83. doi:10.1542/peds.2014-3902  
37  
38 35 World Health Organization. School policy framework: Implementation of the WHO  
39 global strategy on diet, physical activity and health. Geneva: 2008.  
40 <http://www.who.int/dietphysicalactivity/SPF-en-2008.pdf>  
41  
42  
43 36 World Health Organization. Promoting physical activity in schools: An important  
44 element of a health-promoting school.  
45 2007.[https://apps.who.int/iris/bitstream/handle/10665/43733/9789241595995\\_](https://apps.who.int/iris/bitstream/handle/10665/43733/9789241595995_eng.pdf?sequence=1&isAllowed=y)  
46 [eng.pdf?sequen](https://apps.who.int/iris/bitstream/handle/10665/43733/9789241595995_eng.pdf?sequence=1&isAllowed=y)  
47 [ce=1&isAllowed=y](https://apps.who.int/iris/bitstream/handle/10665/43733/9789241595995_eng.pdf?sequence=1&isAllowed=y) (accessed 10 Dec 2019).  
48  
49 37 Anderson PM, Butcher KF. Reading, writing, and refreshments: Are school finances  
50 contributing to children’s obesity? *J Human Resources* 2006;**XLI**:467–94.  
51 doi:10.3368/jhr.XLI.3.467  
52  
53 38 Pearce A, Li L, Abbas J, *et al*. Is childcare associated with the risk of overweight and  
54 obesity in the early years? Findings from the UK Millennium Cohort Study. *Int J Obes*  
55 2010;**34**:1160–8. doi:10.1038/ijo.2010.15  
56  
57  
58  
59  
60

- 1  
2  
3 39 Hawkins SS, Cole TJ, Law C, *et al*. Maternal employment and early childhood  
4 overweight: findings from the UK Millennium Cohort Study. *Int J Obes* 2008;**32**:30–8.  
5 doi:10.1038/sj.ijo.0803682  
6  
7  
8 40 Swyden K, Sisson SB, Lora K, *et al*. Association of childcare arrangement with  
9 overweight and obesity in preschool-aged children: a narrative review of literature. *Int J Obes*  
10 2017;**41**:1–12. doi:10.1038/ijo.2016.198  
11  
12 41 Jago R, Anderson C, Baranowski T, *et al*. Adolescent patterns of physical activity.  
13 Differences by gender, day, and time of day. *Am J Prev Med* 2005;**28**:447–52.  
14 doi:10.1016/j.amepre.2005.02.007  
15  
16 42 Cawley J, Frisvold D, Meyerhoefer C. The impact of physical education on obesity  
17 among elementary school children. *Journal of Health Economics* 2013;**32**:743–55.  
18 doi:10.1016/j.jhealeco.2013.04.006  
19  
20 43 Ruel MT, Alderman H. Nutrition-sensitive interventions and programmes: how can they  
21 help to accelerate progress in improving maternal and child nutrition? *Lancet* 2013;**382**:536–  
22 51. doi:10.1016/S0140-6736(13)60843-0  
23  
24 44 Ng E, Muntaner C. Welfare generosity and population health among Canadian provinces:  
25 a time-series cross-sectional analysis, 1989–2009. *J Epidemiol Community Health*  
26 2015;**69**:970–7. doi:10.1136/jech-2014-205385  
27  
28 45 Nestle M. *Food politics: how the food industry influences nutrition and health*.  
29 Berkeley: : University of California Press 2007.  
30  
31 46 Kirkpatrick SI, Tarasuk V. Housing circumstances are associated with household food  
32 access among low-income urban families. *J Urban Health* 2011;**88**:284–96.  
33 doi:10.1007/s11524-010-9535-4  
34  
35 47 Oddo VM, Nicholas LH, Bleich SN, *et al*. The impact of changing economic conditions  
36 on overweight risk among children in California from 2008 to 2012. *J Epidemiol Community*  
37 *Health* 2016;**70**:874–80. doi:10.1136/jech-2015-207117  
38  
39 48 Goudswaard K, Caminada K. The redistributive effect of public and private social  
40 programmes: A cross-country empirical analysis. *International Social Security Review*  
41 2010;**63**:1–19. doi:10.1111/j.1468-246X.2009.01351.x  
42  
43  
44  
45  
46  
47  
48  
49  
50  
51  
52  
53  
54  
55  
56  
57  
58  
59  
60

**Table 1. Characteristics of Organization for Economic Cooperation and Development 35 countries in 2015**

| Country            | GDP per capita<br>(US dollars) | Unemployment<br>rate<br>(%) | Poverty<br>rate<br>(%) | Children aged < 20<br>(% of population) |
|--------------------|--------------------------------|-----------------------------|------------------------|-----------------------------------------|
| Australia          | 45,584                         | 6.1                         | 18.6                   | 25.1                                    |
| Austria            | 42,906                         | 5.7                         | 20.9                   | 19.7                                    |
| Belgium            | 40,900                         | 8.5                         | 24.5                   | 22.6                                    |
| Canada             | 42,498                         | 6.9                         | 20.0                   | 22.0                                    |
| Chile              | 20,789                         | 6.2                         | 14.5                   | 28.0                                    |
| Czech Republic     | 29,874                         | 5.0                         | 17.3                   | 19.7                                    |
| Denmark            | 44,760                         | 6.2                         | 18.7                   | 23.1                                    |
| Estonia            | 26,023                         | 6.2                         | 20.0                   | 20.6                                    |
| Finland            | 38,272                         | 9.4                         | 23.5                   | 21.9                                    |
| France             | 36,902                         | 10.4                        | 26.2                   | 24.6                                    |
| Germany            | 42,503                         | 4.6                         | 20.0                   | 18.4                                    |
| Greece             | 23,649                         | 24.9                        | 28.9                   | 19.4                                    |
| Hungary            | 24,254                         | 6.8                         | 24.0                   | 19.7                                    |
| Iceland            | 43,726                         | 4.0                         | 11.5                   | 27.0                                    |
| Ireland            | 58,229                         | 9.9                         | 29.9                   | 27.7                                    |
| Israel             | 31,221                         | 5.2                         | 18.8                   | 36.4                                    |
| Italy              | 33,164                         | 11.9                        | 23.9                   | 18.4                                    |
| Japan              | 37,036                         | 3.4                         | 18.4                   | 17.3                                    |
| Latvia             | 22,237                         | 9.9                         | 19.9                   | 19.4                                    |
| Luxembourg         | 87,825                         | 6.7                         | 25.0                   | 22.6                                    |
| Mexico             | 16,660                         | 4.3                         | 16.6                   | 37.2                                    |
| Netherlands        | 45,855                         | 6.9                         | 20.1                   | 22.6                                    |
| New Zealand        | 33,981                         | 5.4                         | 15.2                   | 26.8                                    |
| Norway             | 59,430                         | 4.3                         | 18.1                   | 24.4                                    |
| Poland             | 24,170                         | 7.5                         | 21.2                   | 20.4                                    |
| Portugal           | 26,677                         | 12.4                        | 22.9                   | 19.6                                    |
| Slovakia           | 28,423                         | 11.5                        | 16.8                   | 20.7                                    |
| Slovenia           | 28,203                         | 9.0                         | 21.4                   | 19.4                                    |
| South Korea        | 34,193                         | 3.6                         | 13.5                   | 20.1                                    |
| Spain              | 31,753                         | 22.1                        | 28.8                   | 19.8                                    |
| Sweden             | 44,832                         | 7.4                         | 14.5                   | 22.8                                    |
| Switzerland        | 54,453                         | 4.8                         | 8.8                    | 20.3                                    |
| Turkey             | 22,709                         | 10.2                        | 15.3                   | 32.7                                    |
| United Kingdom     | 38,723                         | 5.3                         | 20.8                   | 23.7                                    |
| United States (US) | 52,105                         | 5.3                         | 19.8                   | 25.7                                    |
| OECD 35 average    | 37,558                         | 7.9                         | 20.0                   | 23.1                                    |

GDP: gross domestic product. The GDP per capita was measured as purchasing power parity adjusted US dollars (fixed price, 2010 as the baseline year). Poverty rate show the ratio of the number of people aged 18–65 whose income falls below half the median household income of the total population, before tax and transfer.

1  
2  
3 **Figure 1. Social spending on children and prevalence of childhood obesity by sex in the**  
4 **Organization for Economic Cooperation and Development (OECD) countries**  
5  
6  
7

8 **Source:** Authors' analysis of data from OECD's Social Expenditure Database (SOCX), OECD  
9 Education statistics database, and NCD Risk Factor Collaboration (NCD-RisC) database.

10 **Notes:** Data are from 2015 for all countries apart from Denmark (2014), Poland (2014),  
11 Netherlands (2011), or New Zealand (2011). The x-axis shows the country-level social spending  
12 on children (including cash benefits and tax breaks for families with children, expenditure on  
13 childcare or other benefits in kind, and expenditure on primary and secondary education),  
14 measured as purchasing power parity (PPP)-adjusted US dollars (fixed price, 2010 as the  
15 baseline year) per child aged under 20 years. The y-axis indicates the country-level prevalence  
16 (%) of children aged 5–19 years categorized as obesity (body mass index > 2 standard deviations  
17 above the WHO growth reference for children). The lines of best fit show that countries whose  
18 governments spend more money on children tend to experience smaller percentages of childhood  
19 obesity for both sexes (Pearson's  $r = -0.32$ ;  $p = 0.06$  for girls and  $r = -0.35$ ;  $p = 0.04$  for boys).  
20  
21  
22  
23  
24  
25  
26  
27  
28  
29  
30  
31  
32  
33  
34  
35  
36  
37  
38  
39  
40  
41  
42  
43  
44  
45  
46  
47  
48  
49  
50  
51  
52  
53  
54  
55  
56  
57  
58  
59  
60

**Table 2. Association between total or five dimensions of social spending on children (US dollars) and the prevalence of childhood obesity (%): Cross sectional analyses in 2015**

| Types of social spending                  | Coefficients          | 95% CI                |                       | P value | R squared |
|-------------------------------------------|-----------------------|-----------------------|-----------------------|---------|-----------|
|                                           |                       | Lower                 | Upper                 |         |           |
| <b>Girls</b>                              |                       |                       |                       |         |           |
| <b>Total social spending <sup>a</sup></b> | $-0.3 \times 10^{-3}$ | $-0.5 \times 10^{-3}$ | $-0.1 \times 10^{-3}$ | 0.01    | 0.92      |
| <b>By dimension <sup>b</sup></b>          |                       |                       |                       |         | 0.89      |
| <b>Family allowance</b>                   | $-0.2 \times 10^{-3}$ | $-0.9 \times 10^{-3}$ | $0.4 \times 10^{-3}$  | 0.43    |           |
| <b>Maternal and parental leave</b>        | $0.7 \times 10^{-3}$  | $-0.6 \times 10^{-3}$ | $1.9 \times 10^{-3}$  | 0.28    |           |
| <b>ECEC</b>                               | $-0.5 \times 10^{-3}$ | $-1.5 \times 10^{-3}$ | $0.5 \times 10^{-3}$  | 0.32    |           |
| <b>Education</b>                          | $-0.5 \times 10^{-3}$ | $-1.1 \times 10^{-3}$ | $0.04 \times 10^{-3}$ | 0.07    |           |
| <b>Others</b>                             | $0.1 \times 10^{-3}$  | $-0.7 \times 10^{-3}$ | $0.9 \times 10^{-3}$  | 0.79    |           |
| <b>Boys</b>                               |                       |                       |                       |         |           |
| <b>Total social spending <sup>a</sup></b> | $-0.4 \times 10^{-3}$ | $-0.7 \times 10^{-3}$ | $-0.1 \times 10^{-3}$ | 0.02    | 0.83      |
| <b>By dimension <sup>b</sup></b>          |                       |                       |                       |         | 0.79      |
| <b>Family allowance</b>                   | $-0.1 \times 10^{-3}$ | $-1.0 \times 10^{-3}$ | $0.8 \times 10^{-3}$  | 0.79    |           |
| <b>Maternal and parental leave</b>        | $1.3 \times 10^{-3}$  | $-0.5 \times 10^{-3}$ | $3.1 \times 10^{-3}$  | 0.14    |           |
| <b>ECEC</b>                               | $-0.7 \times 10^{-3}$ | $-2.1 \times 10^{-3}$ | $0.8 \times 10^{-3}$  | 0.37    |           |
| <b>Education</b>                          | $-0.7 \times 10^{-3}$ | $-1.5 \times 10^{-3}$ | $0.1 \times 10^{-3}$  | 0.07    |           |
| <b>Others</b>                             | $0.1 \times 10^{-3}$  | $-1.0 \times 10^{-3}$ | $1.1 \times 10^{-3}$  | 0.87    |           |

CI: Confidence interval. ECEC: Early childhood education and care.

For each sex, we examined the association between social spending on children (PPP-adjusted US dollars) and prevalence of childhood obesity (%) by using a multivariable linear regression model that adjusted for the countries' demographics (employment rate, poverty rate, and percentage of children aged < 20 years) in 2015 and the prevalence of childhood obesity in 2000. We reported the coefficient. For example, our results indicated that among girls, a 1000 US dollar difference in total social spending per children was associated with a 0.3 percentage points lower prevalence of childhood obesity.

<sup>a</sup> We regressed the prevalence of childhood obesity on total social spending on children. These analyses were conducted for all the 35 countries.

<sup>b</sup> We regressed the prevalence of childhood obesity on five dimensions of social spending on children. These analyses were conducted for 33 countries. Mexico and United States of America were excluded because either dimension of social spending is not available.

1  
2  
3 **Figure 2. Changes in social spending on children and in the prevalence of childhood obesity**  
4 **from 2000 to 2015 in the Organization for Economic Cooperation and Development**  
5 **(OECD) countries**  
6  
7  
8

9 **Source:** Authors' analysis of data from OECD's Social Expenditure Database (SOCX), OECD  
10 Education statistics database, and NCD Risk Factor Collaboration (NCD-RisC) database.

11 **Notes:** The x-axis shows the average annual change in social spending on children (PPP-adjusted  
12 US dollars per child) adjusted by the growth in GDP per capita during 2000–2015. The y-axis  
13 indicates the absolute change in the prevalence of childhood obesity from 2000 to 2015. The  
14 lines of best fit show that changes in social spending on children and the percentage of childhood  
15 obesity are inversely associated for both sexes (Pearson's  $r = -0.49$ ;  $p < 0.01$  for girls and  $r =$   
16  $-0.28$ ;  $p = 0.10$  for boys).  
17  
18  
19  
20  
21  
22  
23  
24  
25  
26  
27  
28  
29  
30  
31  
32  
33  
34  
35  
36  
37  
38  
39  
40  
41  
42  
43  
44  
45  
46  
47  
48  
49  
50  
51  
52  
53  
54  
55  
56  
57  
58  
59  
60



**Table 3. Association between changes in total or five dimensions of social spending on children (US dollars) and the prevalence of childhood obesity (%): Longitudinal analyses from 2000 to 2015**

| Types of social spending                 | Coefficients          | 95% CI                |                        | P value | R squared |
|------------------------------------------|-----------------------|-----------------------|------------------------|---------|-----------|
|                                          |                       | Lower                 | Upper                  |         |           |
| <i>Girls</i>                             |                       |                       |                        |         |           |
| <b>Total social spending<sup>a</sup></b> | $-0.6 \times 10^{-2}$ | $-1.0 \times 10^{-2}$ | $-0.2 \times 10^{-2}$  | 0.007   | 0.65      |
| <b>By dimension<sup>b</sup></b>          |                       |                       |                        |         | 0.72      |
| <b>Family allowance</b>                  | $-0.8 \times 10^{-2}$ | $-2.0 \times 10^{-2}$ | $0.5 \times 10^{-2}$   | 0.20    |           |
| <b>Maternal and parental leave</b>       | $1.0 \times 10^{-2}$  | $-1.5 \times 10^{-2}$ | $3.5 \times 10^{-2}$   | 0.42    |           |
| <b>ECEC</b>                              | $-1.2 \times 10^{-2}$ | $-2.4 \times 10^{-2}$ | $0.03 \times 10^{-2}$  | 0.045   |           |
| <b>Education</b>                         | $-1.1 \times 10^{-2}$ | $-1.9 \times 10^{-2}$ | $0.3 \times 10^{-2}$   | 0.01    |           |
| <b>Others</b>                            | $0.4 \times 10^{-2}$  | $-0.5 \times 10^{-2}$ | $1.3 \times 10^{-2}$   | 0.35    |           |
| <i>Boys</i>                              |                       |                       |                        |         |           |
| <b>Total social spending<sup>a</sup></b> | $-0.7 \times 10^{-2}$ | $-1.3 \times 10^{-2}$ | $-0.03 \times 10^{-2}$ | 0.04    | 0.55      |
| <b>By dimension<sup>b</sup></b>          |                       |                       |                        |         | 0.57      |
| <b>Family allowance</b>                  | $-1.2 \times 10^{-2}$ | $-3.4 \times 10^{-2}$ | $0.9 \times 10^{-2}$   | 0.26    |           |
| <b>Maternal and parental leave</b>       | $0.1 \times 10^{-2}$  | $-3.9 \times 10^{-2}$ | $4.1 \times 10^{-2}$   | 0.96    |           |
| <b>ECEC</b>                              | $-2.1 \times 10^{-2}$ | $-4.1 \times 10^{-2}$ | $-0.01 \times 10^{-2}$ | 0.049   |           |
| <b>Education</b>                         | $-0.5 \times 10^{-2}$ | $-2.0 \times 10^{-2}$ | $0.9 \times 10^{-2}$   | 0.43    |           |
| <b>Others</b>                            | $0.2 \times 10^{-2}$  | $-1.3 \times 10^{-2}$ | $1.7 \times 10^{-2}$   | 0.79    |           |

CI: Confidence interval. ECEC: Early childhood education and care.

For each sex, we examined the association between the changes in social spending on children (PPP-adjusted US dollars) and the prevalence of childhood obesity (%) from 2000 to 2015, by using a multivariable linear regression model that adjusted for average annual changes in employment rate and poverty rate, changes in the percentage of children aged < 20 years, and the “baseline” prevalence of childhood obesity in 2000. We reported the coefficient. For example, our results indicated that among girls, a 100 US dollar average annual increase in total social spending per child was associated with a 0.6 percentage points decrease in the prevalence of childhood obesity between 2000 and 2015.

<sup>a</sup> We regressed the change in the prevalence of childhood obesity on the change in total social spending on children. The analyses were conducted for 33 countries. South Korea and Luxembourg were excluded because the average annual change in unemployment rate or poverty rate cannot be calculated (data for more than two years are not available).

<sup>b</sup> We regressed the change in the prevalence of childhood obesity on the changes in five dimensions of social spending on children. The analyses were conducted for 31 countries. South Korea, Luxembourg, Mexico, and United States of America were excluded because the average annual change in either dimension of social spending or the average annual change in unemployment rate or poverty rate cannot be calculated (data for more than two years are not available).



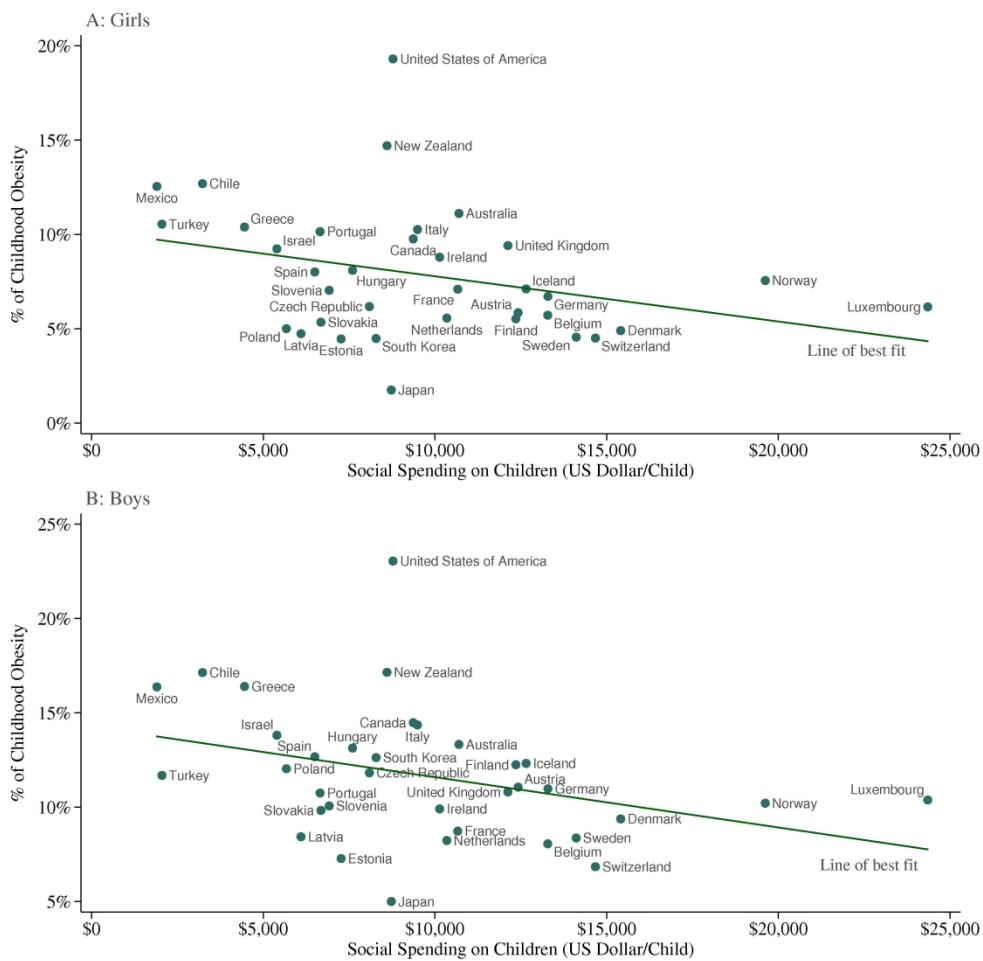

Figure 1. Social spending on children and prevalence of childhood obesity by sex in the Organization for Economic Cooperation and Development (OECD) countries

Source: Authors' analysis of data from OECD's Social Expenditure Database (SOCX), OECD Education statistics database, and NCD Risk Factor Collaboration (NCD-RisC) database.

Notes: Data are from 2015 for all countries apart from Denmark (2014), Poland (2014), Netherlands (2011), or New Zealand (2011). The x-axis shows the country-level social spending on children (including cash benefits and tax breaks for families with children, expenditure on childcare or other benefits in kind, and expenditure on primary and secondary education), measured as purchasing power parity (PPP)-adjusted US dollars (fixed price, 2010 as the baseline year) per child aged under 20 years. The y-axis indicates the country-level prevalence (%) of children aged 5–19 years categorized as obesity (body mass index > 2 standard deviations above the WHO growth reference for children). The lines of best fit show that countries whose governments spend more money on children tend to experience smaller percentages of childhood obesity for both sexes (Pearson's  $r = -0.32$ ;  $p = 0.06$  for girls and  $r = -0.35$ ;  $p = 0.04$  for boys).

139x139mm (600 x 600 DPI)

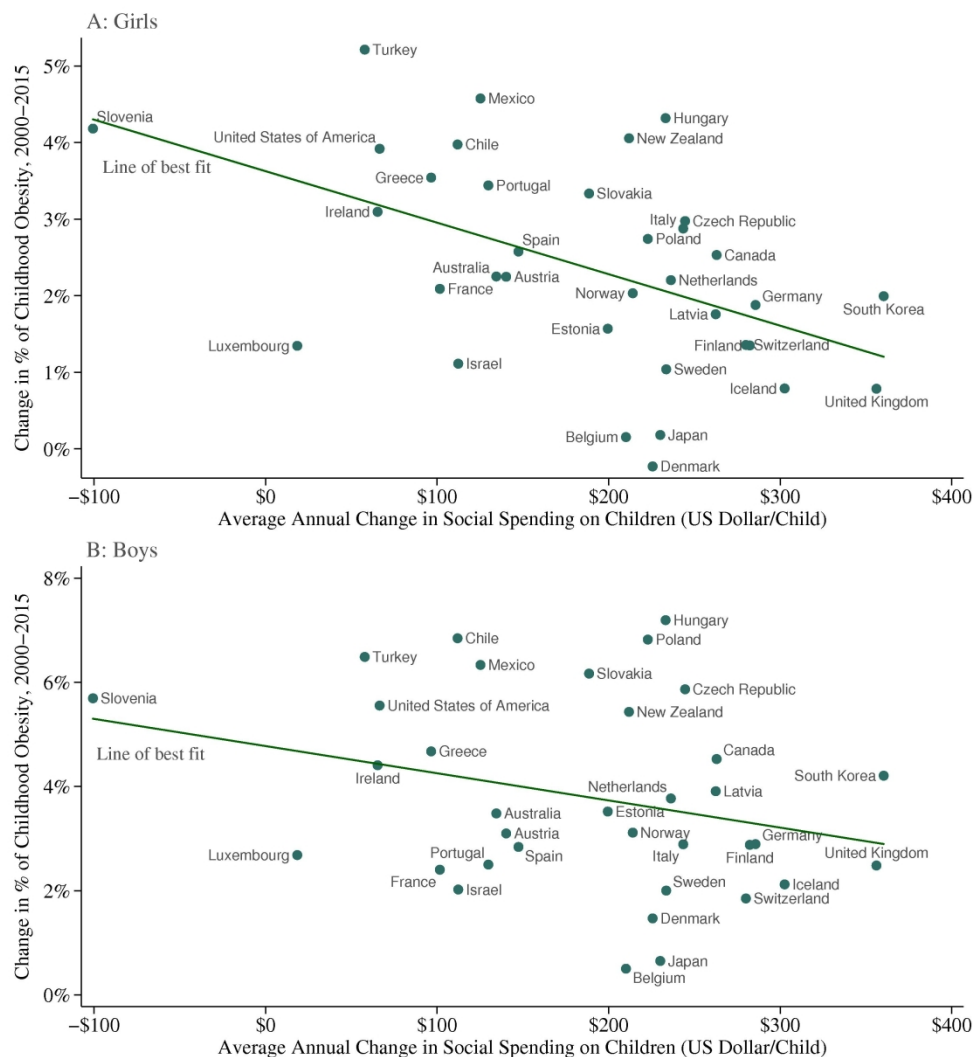

Figure 2. Changes in social spending on children and in the prevalence of childhood obesity from 2000 to 2015 in the Organization for Economic Cooperation and Development (OECD) countries

Source: Authors' analysis of data from OECD's Social Expenditure Database (SOCX), OECD Education statistics database, and NCD Risk Factor Collaboration (NCD-RisC) database.

Notes: The x-axis shows the average annual change in social spending on children (PPP-adjusted US dollars per child) adjusted by the growth in GDP per capita during 2000–2015. The y-axis indicates the absolute change in the prevalence of childhood obesity from 2000 to 2015. The lines of best fit show that changes in social spending on children and the percentage of childhood obesity are inversely associated for both sexes (Pearson's  $r = -0.49$ ;  $p < 0.01$  for girls and  $r = -0.28$ ;  $p = 0.10$  for boys).

127x139mm (600 x 600 DPI)

1  
2  
3  
4  
5  
6  
7  
8  
9

## Supplementary Material

### Relationships between Social Spending and Childhood Obesity in OECD Countries: More Welfare, Less Obesity?

10 Atsushi Miyawaki, Charlotte E.L. Evans, Patricia J. Lucas, Yasuki Kobayashi  
11  
12  
13  
14  
15  
16  
17  
18  
19  
20  
21  
22  
23  
24  
25  
26  
27  
28  
29  
30  
31  
32  
33  
34  
35  
36  
37  
38  
39  
40  
41  
42  
43  
44  
45  
46  
47  
48  
49  
50  
51  
52  
53  
54  
55  
56  
57  
58  
59  
60

For peer review only

Table S1. Details of each dimension in social spending on family

| Dimensions                                                                  | Details                                                                                                                          |
|-----------------------------------------------------------------------------|----------------------------------------------------------------------------------------------------------------------------------|
| <b>Family allowances<br/>(Cash benefits / Tax<br/>break)</b>                | Family allowance                                                                                                                 |
|                                                                             | Family income supplement                                                                                                         |
|                                                                             | Family allowance supplement                                                                                                      |
|                                                                             | Basic family payment                                                                                                             |
|                                                                             | Additional family payment                                                                                                        |
|                                                                             | Home child care allowance                                                                                                        |
|                                                                             | Family tax payment                                                                                                               |
|                                                                             | Family tax benefit (Part A and B)                                                                                                |
|                                                                             | More help for families—one-off payments                                                                                          |
|                                                                             | Parenting payment (Single and Partnered)                                                                                         |
|                                                                             | Single Income Family Bonus (2008)                                                                                                |
|                                                                             | Back to School Bonus (2008)                                                                                                      |
|                                                                             | Economic Security Strategy (2008)                                                                                                |
|                                                                             | Single Income Family Supplement                                                                                                  |
| Schoolkids Bonus                                                            |                                                                                                                                  |
| <b>Maternity and parental<br/>leave<br/>(Cash benefits / Tax<br/>break)</b> | Maternity allowances                                                                                                             |
|                                                                             | Maternity immunization allowance                                                                                                 |
|                                                                             | Baby Bonus (previously Maternity payment)                                                                                        |
|                                                                             | Parental Leave Pay                                                                                                               |
|                                                                             | Dad and Partner Pay                                                                                                              |
|                                                                             | Stillborn Baby Payment                                                                                                           |
| <b>Early childhood education<br/>and care (ECEC)<br/>(Benefits in kind)</b> | National Partnerships on Early Childhood Education and Care - National Occasional Care                                           |
|                                                                             | Support for the Child Care System - Child Care Communications Campaign                                                           |
|                                                                             | Child care support                                                                                                               |
|                                                                             | Child care for eligible parents undergoing training                                                                              |
|                                                                             | Support for child care                                                                                                           |
|                                                                             | Support for child care: specific purpose payment                                                                                 |
|                                                                             | Child care benefit                                                                                                               |
|                                                                             | Child care (pre-primary education)                                                                                               |
|                                                                             | Child care (pre-primary education - 4-5yo)                                                                                       |
|                                                                             | Child Care Tax Rebate                                                                                                            |
|                                                                             | Support for the Child Care System - Child Care Services Support                                                                  |
|                                                                             | Support for the Child Care System - Job Education and Training                                                                   |
|                                                                             | Child Care Fee Assistance - Child Care Benefit                                                                                   |
|                                                                             | Child Care Fee Assistance - Child Care Rebate                                                                                    |
|                                                                             | National Partnerships on Early Childhood Education and Care - Indigenous Early Childhood Development Children and Family Centers |
|                                                                             | National Partnerships on Early Childhood Education and Care - TAFE Fee Waivers for Child Care Qualifications                     |
|                                                                             | National Partnerships on Early Childhood Education and Care - National Quality Agenda                                            |
|                                                                             | State/Territory Child Care Expenditure                                                                                           |
|                                                                             | National Partnership on Universal Access to Early Childhood Education                                                            |
|                                                                             | Early Childhood Education - 4 and 5 year olds in ISCED 1 (Primary school)                                                        |

|                                                   |                                                                      |
|---------------------------------------------------|----------------------------------------------------------------------|
|                                                   |                                                                      |
| <b>Others<br/>(Cash benefits / Tax<br/>break)</b> | Supporting parent's benefit                                          |
|                                                   | Sole parents pension                                                 |
|                                                   | Partner allowance (pension)                                          |
|                                                   | Parenting allowance                                                  |
|                                                   | Assistance for Isolated Children                                     |
| <b>Others<br/>(Benefits in kind)</b>              | Home help / Accommodation                                            |
|                                                   | Parenting                                                            |
|                                                   | Family support services scheme                                       |
|                                                   | Child abuse prevention                                               |
|                                                   | Family violence partnership                                          |
|                                                   | Family violence regional activities                                  |
|                                                   | Grants to family relationship support organizations                  |
|                                                   | Indigenous parenting and family well-being                           |
|                                                   | National illicit drug strategy                                       |
|                                                   | Services for families with children                                  |
|                                                   | Stronger families and communities strategy: families initiative      |
|                                                   | Services for families with children: specific purpose payment        |
|                                                   | Pre-school education                                                 |
|                                                   | Family and child welfare - State and Territory                       |
|                                                   | Child protection and out-of-home care services - State and Territory |
|                                                   | Family Support                                                       |
| Find and Connect                                  |                                                                      |
| Families and Children                             |                                                                      |

**Source:** OECD's Social Expenditure Database (SOCX).

**Method S1. Technical appendix**

I regressed the average annual growth in social spending on the average annual growth in GDP per capita and calculated the residuals. Then, I calibrated them by adding the average of annual growth in social spending so that “cross-national mean of adjusted average annual growth in social spending” = “cross-national mean of unadjusted average annual growth in social spending.”

For peer review only

**Figure S1. Specific dimensions of social spending on children in OECD countries compared with the OECD averages in 2015**

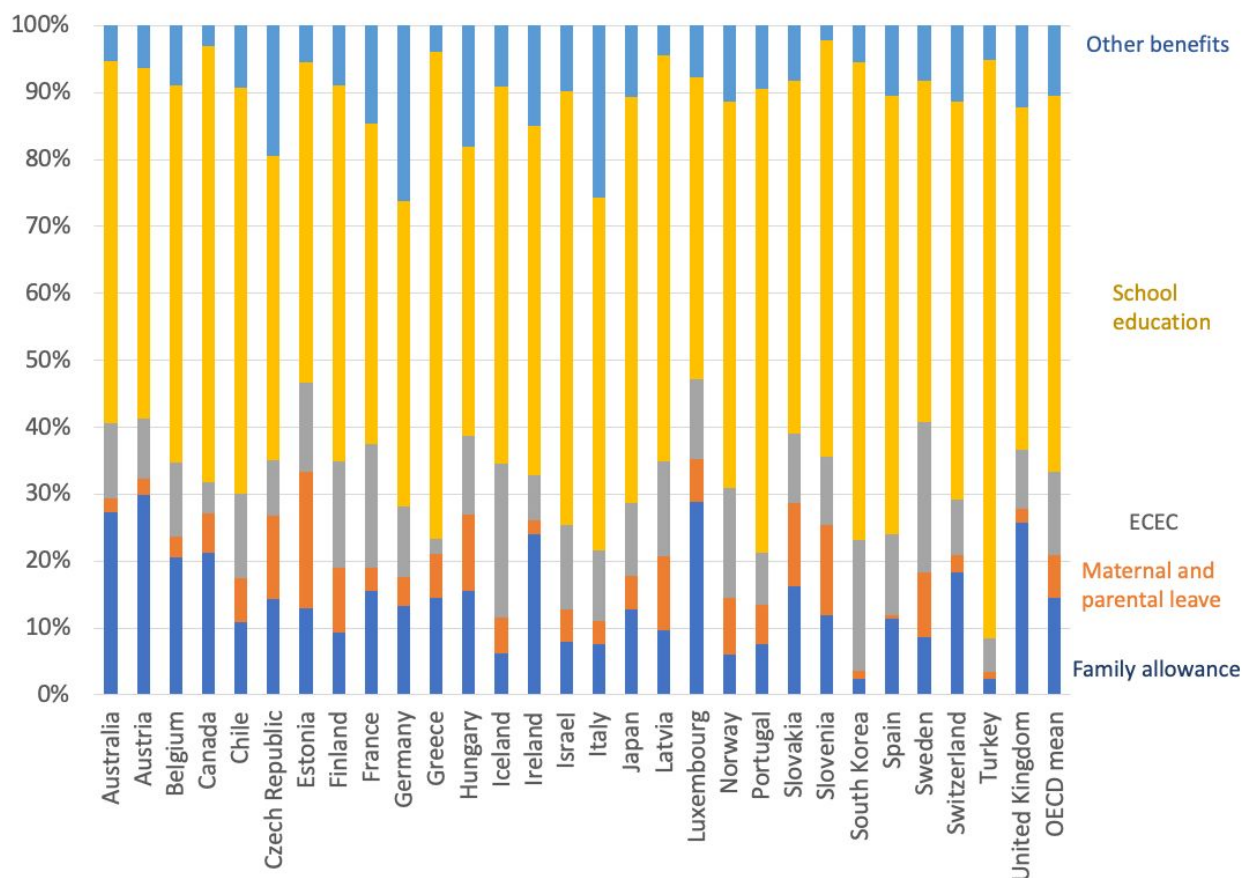

**Source:** Authors' analysis of data from Organization for Economic Cooperation and Development (OECD) Social Expenditure Database (SOCX).

**Notes:** Specific dimensions of social spending on children are shown for 29 OECD countries for which the information on all the dimensions of social spending on children are available (Denmark, Mexico, Netherlands, New Zealand, Poland, and the United States are excluded). The OECD mean is calculated for these 29 countries. ECEC: Early childhood education and care.

**Table S2. Association between total or five dimensions of social spending on children (US dollars) and the prevalence of childhood obesity (%) for countries with lower vs. higher gross domestic product (GDP) per capita: Cross sectional analyses in 2015**

| Types of social spending           | Lower GDP per capita  |                       |                       |         | Higher GDP per capita  |                       |                        |         | P-for-interaction |
|------------------------------------|-----------------------|-----------------------|-----------------------|---------|------------------------|-----------------------|------------------------|---------|-------------------|
|                                    | Coefficients          | 95% CI                |                       | P value | Coefficients           | 95% CI                |                        | P value |                   |
|                                    |                       | Lower                 | Upper                 |         |                        | Lower                 | Upper                  |         |                   |
| <b>Girls</b>                       |                       |                       |                       |         |                        |                       |                        |         |                   |
| Total social spending <sup>b</sup> | $0.05 \times 10^{-3}$ | $-1.1 \times 10^{-3}$ | $1.2 \times 10^{-3}$  | 0.93    | $-0.2 \times 10^{-3}$  | $-0.4 \times 10^{-3}$ | $-0.02 \times 10^{-3}$ | 0.03    | 0.12              |
| By dimension <sup>c</sup>          |                       |                       |                       |         |                        |                       |                        |         |                   |
| Family allowance                   | $2.4 \times 10^{-3}$  | $-1.6 \times 10^{-3}$ | $6.3 \times 10^{-3}$  | 0.19    | $-0.4 \times 10^{-3}$  | $-2.5 \times 10^{-3}$ | $1.8 \times 10^{-3}$   | 0.68    | 0.21              |
| Maternal and parental leave        | $-2.6 \times 10^{-3}$ | $-6.8 \times 10^{-3}$ | $1.5 \times 10^{-3}$  | 0.17    | $0.5 \times 10^{-3}$   | $-7.3 \times 10^{-3}$ | $8.4 \times 10^{-3}$   | 0.87    | 0.33              |
| ECEC                               | $-2.0 \times 10^{-3}$ | $-5.9 \times 10^{-3}$ | $2.0 \times 10^{-3}$  | 0.27    | $-0.7 \times 10^{-3}$  | $-4.8 \times 10^{-3}$ | $3.5 \times 10^{-3}$   | 0.70    | 0.49              |
| Education                          | $-0.5 \times 10^{-3}$ | $-3.7 \times 10^{-3}$ | $2.8 \times 10^{-3}$  | 0.74    | $-0.3 \times 10^{-3}$  | $-1.1 \times 10^{-3}$ | $0.6 \times 10^{-3}$   | 0.49    | 0.61              |
| Others                             | $-0.5 \times 10^{-3}$ | $-3.1 \times 10^{-3}$ | $2.1 \times 10^{-3}$  | 0.67    | $-0.01 \times 10^{-3}$ | $-1.9 \times 10^{-3}$ | $1.9 \times 10^{-3}$   | 0.99    | 0.78              |
| <b>Boys</b>                        |                       |                       |                       |         |                        |                       |                        |         |                   |
| Total social spending <sup>b</sup> | $-0.1 \times 10^{-3}$ | $-1.5 \times 10^{-3}$ | $1.4 \times 10^{-3}$  | 0.92    | $-0.2 \times 10^{-3}$  | $-0.5 \times 10^{-3}$ | $-0.1 \times 10^{-3}$  | 0.04    | 0.07              |
| By dimension <sup>c</sup>          |                       |                       |                       |         |                        |                       |                        |         |                   |
| Family allowance                   | $3.1 \times 10^{-3}$  | $-0.2 \times 10^{-3}$ | $6.3 \times 10^{-3}$  | 0.06    | $-0.4 \times 10^{-3}$  | $-2.0 \times 10^{-3}$ | $1.3 \times 10^{-3}$   | 0.58    | 0.33              |
| Maternal and parental leave        | $-4.8 \times 10^{-3}$ | $-8.6 \times 10^{-3}$ | $-1.0 \times 10^{-3}$ | 0.02    | $1.3 \times 10^{-3}$   | $-5.4 \times 10^{-3}$ | $8.0 \times 10^{-3}$   | 0.64    | 0.41              |
| ECEC                               | $-2.3 \times 10^{-3}$ | $-5.7 \times 10^{-3}$ | $1.3 \times 10^{-3}$  | 0.17    | $-1.3 \times 10^{-3}$  | $-4.2 \times 10^{-3}$ | $1.7 \times 10^{-3}$   | 0.32    | 0.64              |
| Education                          | $-2.2 \times 10^{-3}$ | $-4.8 \times 10^{-3}$ | $0.4 \times 10^{-3}$  | 0.09    | $-0.3 \times 10^{-3}$  | $-1.2 \times 10^{-3}$ | $0.7 \times 10^{-3}$   | 0.54    | 0.35              |
| Others                             | $-1.3 \times 10^{-3}$ | $-3.5 \times 10^{-3}$ | $1.0 \times 10^{-3}$  | 0.22    | $0.1 \times 10^{-3}$   | $-1.5 \times 10^{-3}$ | $1.6 \times 10^{-3}$   | 0.92    | 0.99              |

We divided OECD countries in half according to GDP per capita in 2000 and repeated the regression analyses for each group. See Table 2 in the main text of the manuscript for more details.

<sup>a</sup> We formally tested the interaction between the level of GDP per capita in 2000 (lower vs. upper) and social spending on children using a Wald test.

<sup>b</sup> We regressed the prevalence of childhood obesity on total social spending on children. These analyses were conducted for 18 countries with lower GDP per capita in 2000 and 17 countries with higher GDP per capita in 2000.

<sup>c</sup> We regressed the prevalence of childhood obesity on five dimensions of social spending on children. These analyses were conducted for 17 countries with lower GDP per capita in 2000 and 16 countries with higher GDP per capita in 2000. Mexico and United States of America were excluded because either dimension of social spending is not available.



**Table S3. Association between changes in total or five dimensions of social spending on children (US dollars) and the prevalence of childhood obesity (%) for countries with lower vs. higher gross domestic product (GDP) per capita: Longitudinal analyses from 2000 to 2015**

| Types of social spending           | Lower GDP per capita  |                        |                       |         | Higher GDP per capita |                       |                       | P-for-interaction |         |
|------------------------------------|-----------------------|------------------------|-----------------------|---------|-----------------------|-----------------------|-----------------------|-------------------|---------|
|                                    | Coefficients          | 95% CI                 |                       | P value | Coefficients          | 95% CI                |                       |                   | P value |
|                                    |                       | Lower                  | Upper                 |         |                       | Lower                 | Upper                 |                   |         |
| <i>Girls</i>                       |                       |                        |                       |         |                       |                       |                       |                   |         |
| Total social spending <sup>b</sup> | $-0.3 \times 10^{-2}$ | $-0.9 \times 10^{-2}$  | $0.3 \times 10^{-2}$  | 0.30    | $-0.4 \times 10^{-2}$ | $-1.1 \times 10^{-2}$ | $0.3 \times 10^{-2}$  | 0.26              | 0.46    |
| By dimension <sup>c</sup>          |                       |                        |                       |         |                       |                       |                       |                   |         |
| Family allowance                   | $-5.8 \times 10^{-2}$ | $-13.4 \times 10^{-2}$ | $1.7 \times 10^{-2}$  | 0.11    | $-0.7 \times 10^{-2}$ | $-3.1 \times 10^{-2}$ | $1.6 \times 10^{-2}$  | 0.46              | 0.38    |
| Maternal and parental leave        | $1.7 \times 10^{-2}$  | $-3.1 \times 10^{-2}$  | $6.4 \times 10^{-2}$  | 0.42    | $-0.5 \times 10^{-2}$ | $-3.4 \times 10^{-2}$ | $2.4 \times 10^{-2}$  | 0.67              | 0.58    |
| ECEC                               | $1.2 \times 10^{-2}$  | $-4.9 \times 10^{-2}$  | $7.3 \times 10^{-2}$  | 0.65    | $1.6 \times 10^{-2}$  | $-4.2 \times 10^{-2}$ | $7.3 \times 10^{-2}$  | 0.52              | 0.11    |
| Education                          | $0.6 \times 10^{-2}$  | $-1.1 \times 10^{-2}$  | $2.4 \times 10^{-2}$  | 0.41    | $1.4 \times 10^{-2}$  | $-2.5 \times 10^{-2}$ | $5.3 \times 10^{-2}$  | 0.39              | 0.90    |
| Others                             | $-1.0 \times 10^{-2}$ | $-3.5 \times 10^{-2}$  | $1.4 \times 10^{-2}$  | 0.33    | $-1.3 \times 10^{-2}$ | $-4.0 \times 10^{-2}$ | $1.5 \times 10^{-2}$  | 0.29              | 0.91    |
| <i>Boys</i>                        |                       |                        |                       |         |                       |                       |                       |                   |         |
| Total social spending <sup>b</sup> | $-0.3 \times 10^{-2}$ | $-1.3 \times 10^{-2}$  | $0.7 \times 10^{-2}$  | 0.52    | $-0.2 \times 10^{-2}$ | $-1.3 \times 10^{-2}$ | $0.8 \times 10^{-2}$  | 0.64              | 0.36    |
| By dimension <sup>c</sup>          |                       |                        |                       |         |                       |                       |                       |                   |         |
| Family allowance                   | $-5.5 \times 10^{-2}$ | $-19.7 \times 10^{-2}$ | $8.6 \times 10^{-2}$  | 0.38    | $-0.8 \times 10^{-2}$ | $-4.5 \times 10^{-2}$ | $3.0 \times 10^{-2}$  | 0.62              | 0.61    |
| Maternal and parental leave        | $1.4 \times 10^{-2}$  | $-7.7 \times 10^{-2}$  | $10.4 \times 10^{-2}$ | 0.73    | $0.1 \times 10^{-2}$  | $-5.1 \times 10^{-2}$ | $5.2 \times 10^{-2}$  | 0.97              | 0.41    |
| ECEC                               | $0.7 \times 10^{-2}$  | $-9.2 \times 10^{-2}$  | $10.7 \times 10^{-2}$ | 0.86    | $1.1 \times 10^{-2}$  | $-8.8 \times 10^{-2}$ | $11.0 \times 10^{-2}$ | 0.78              | 0.29    |
| Education                          | $0.1 \times 10^{-2}$  | $-3.1 \times 10^{-2}$  | $3.3 \times 10^{-2}$  | 0.92    | $1.0 \times 10^{-2}$  | $-5.1 \times 10^{-2}$ | $7.1 \times 10^{-2}$  | 0.68              | 0.91    |
| Others                             | $-0.2 \times 10^{-2}$ | $-4.7 \times 10^{-2}$  | $4.4 \times 10^{-2}$  | 0.93    | $-0.7 \times 10^{-2}$ | $-5.7 \times 10^{-2}$ | $4.3 \times 10^{-2}$  | 0.74              | 0.44    |

We divided OECD countries in half according to GDP per capita in 2000 and repeated the regression analyses for each group. See Table 3 in the main text of the manuscript for more details.

<sup>a</sup> We formally tested the interaction between the level of GDP per capita in 2000 (lower vs. upper) and changes in social spending on children using a Wald test.

<sup>b</sup> We regressed the change in the prevalence of childhood obesity on the change in total social spending on children. The analyses were conducted for 17 countries with lower GDP per capita in 2000 and 16 countries with higher GDP per capita in 2000.

<sup>c</sup> We regressed the change in the prevalence of childhood obesity on the changes in five dimensions of social spending on children. The analyses were conducted for 16 countries with lower GDP per capita in 2000 and 15 countries with higher GDP per capita in 2000.

# Reporting checklist for cross sectional study.

Based on the STROBE cross sectional guidelines.

## Instructions to authors

Complete this checklist by entering the page numbers from your manuscript where readers will find each of the items listed below.

Your article may not currently address all the items on the checklist. Please modify your text to include the missing information. If you are certain that an item does not apply, please write "n/a" and provide a short explanation.

Upload your completed checklist as an extra file when you submit to a journal.

In your methods section, say that you used the STROBE cross sectional reporting guidelines, and cite them as:

von Elm E, Altman DG, Egger M, Pocock SJ, Gøtzsche PC, Vandenbroucke JP. The Strengthening the Reporting of Observational Studies in Epidemiology (STROBE) Statement: guidelines for reporting observational studies.

|                           |                     | Reporting Item                                                                                  | Page Number |
|---------------------------|---------------------|-------------------------------------------------------------------------------------------------|-------------|
| <b>Title and abstract</b> |                     |                                                                                                 |             |
| Title                     | <a href="#">#1a</a> | Indicate the study's design with a commonly used term in the title or the abstract              | 1           |
| Abstract                  | <a href="#">#1b</a> | Provide in the abstract an informative and balanced summary of what was done and what was found | 3           |
| <b>Introduction</b>       |                     |                                                                                                 |             |
| Background / rationale    | <a href="#">#2</a>  | Explain the scientific background and rationale for the investigation being reported            | 6-7         |
| Objectives                | <a href="#">#3</a>  | State specific objectives, including any prespecified hypotheses                                | 7-8         |
| <b>Methods</b>            |                     |                                                                                                 |             |
| Study design              | <a href="#">#4</a>  | Present key elements of study design early in the paper                                         | 8-9         |
| Setting                   | <a href="#">#5</a>  | Describe the setting, locations, and relevant dates, including periods of                       | 8-9         |

|    |                      |                                                                                                              |       |
|----|----------------------|--------------------------------------------------------------------------------------------------------------|-------|
|    |                      | recruitment, exposure, follow-up, and data collection                                                        |       |
| 1  |                      |                                                                                                              |       |
| 2  |                      |                                                                                                              |       |
| 3  | Eligibility criteria | <a href="#">#6a</a> Give the eligibility criteria, and the sources and methods of selection of participants. | 8-9   |
| 4  |                      |                                                                                                              |       |
| 5  |                      |                                                                                                              |       |
| 6  |                      | <a href="#">#7</a> Clearly define all outcomes, exposures, predictors, potential                             | 9-10  |
| 7  |                      | confounders, and effect modifiers. Give diagnostic criteria, if applicable                                   |       |
| 8  |                      |                                                                                                              |       |
| 9  |                      |                                                                                                              |       |
| 10 | Data sources /       | <a href="#">#8</a> For each variable of interest give sources of data and details of methods                 | 8-9   |
| 11 | measurement          | of assessment (measurement). Describe comparability of assessment                                            |       |
| 12 |                      | methods if there is more than one group. Give information separately                                         |       |
| 13 |                      | for for exposed and unexposed groups if applicable.                                                          |       |
| 14 |                      |                                                                                                              |       |
| 15 |                      |                                                                                                              |       |
| 16 |                      |                                                                                                              |       |
| 17 | Bias                 | <a href="#">#9</a> Describe any efforts to address potential sources of bias                                 | 10-11 |
| 18 |                      |                                                                                                              |       |
| 19 | Study size           | <a href="#">#10</a> Explain how the study size was arrived at                                                | 8     |
| 20 |                      |                                                                                                              |       |
| 21 | Quantitative         | <a href="#">#11</a> Explain how quantitative variables were handled in the analyses. If                      | 11    |
| 22 | variables            | applicable, describe which groupings were chosen, and why                                                    |       |
| 23 |                      |                                                                                                              |       |
| 24 |                      |                                                                                                              |       |
| 25 | Statistical          | <a href="#">#12a</a> Describe all statistical methods, including those used to control for                   | 11    |
| 26 | methods              | confounding                                                                                                  |       |
| 27 |                      |                                                                                                              |       |
| 28 |                      |                                                                                                              |       |
| 29 | Statistical          | <a href="#">#12b</a> Describe any methods used to examine subgroups and interactions                         | N/A   |
| 30 | methods              |                                                                                                              |       |
| 31 |                      |                                                                                                              |       |
| 32 |                      |                                                                                                              |       |
| 33 | Statistical          | <a href="#">#12c</a> Explain how missing data were addressed                                                 | 11-12 |
| 34 | methods              |                                                                                                              |       |
| 35 |                      |                                                                                                              |       |
| 36 |                      |                                                                                                              |       |
| 37 | Statistical          | <a href="#">#12d</a> If applicable, describe analytical methods taking account of sampling                   | N/A   |
| 38 | methods              | strategy                                                                                                     |       |
| 39 |                      |                                                                                                              |       |
| 40 |                      |                                                                                                              |       |
| 41 | Statistical          | <a href="#">#12e</a> Describe any sensitivity analyses                                                       | 13    |
| 42 | methods              |                                                                                                              |       |
| 43 |                      |                                                                                                              |       |
| 44 | <b>Results</b>       |                                                                                                              |       |
| 45 |                      |                                                                                                              |       |
| 46 |                      |                                                                                                              |       |
| 47 | Participants         | <a href="#">#13a</a> Report numbers of individuals at each stage of study—eg numbers                         | 12    |
| 48 |                      | potentially eligible, examined for eligibility, confirmed eligible,                                          |       |
| 49 |                      | included in the study, completing follow-up, and analysed. Give                                              |       |
| 50 |                      | information separately for for exposed and unexposed groups if                                               |       |
| 51 |                      | applicable.                                                                                                  |       |
| 52 |                      |                                                                                                              |       |
| 53 |                      |                                                                                                              |       |
| 54 |                      |                                                                                                              |       |
| 55 | Participants         | <a href="#">#13b</a> Give reasons for non-participation at each stage                                        | 12    |
| 56 |                      |                                                                                                              |       |
| 57 | Participants         | <a href="#">#13c</a> Consider use of a flow diagram                                                          | N/A   |
| 58 |                      |                                                                                                              |       |
| 59 |                      |                                                                                                              |       |
| 60 |                      |                                                                                                              |       |

|    |                    |                      |                                                                                                                                                                                                                   |       |
|----|--------------------|----------------------|-------------------------------------------------------------------------------------------------------------------------------------------------------------------------------------------------------------------|-------|
| 1  | Descriptive data   | <a href="#">#14a</a> | Give characteristics of study participants (eg demographic, clinical, social) and information on exposures and potential confounders. Give information separately for exposed and unexposed groups if applicable. | 12    |
| 2  |                    |                      |                                                                                                                                                                                                                   |       |
| 3  |                    |                      |                                                                                                                                                                                                                   |       |
| 4  |                    |                      |                                                                                                                                                                                                                   |       |
| 5  |                    |                      |                                                                                                                                                                                                                   |       |
| 6  | Descriptive data   | <a href="#">#14b</a> | Indicate number of participants with missing data for each variable of interest                                                                                                                                   | 13    |
| 7  |                    |                      |                                                                                                                                                                                                                   |       |
| 8  |                    |                      |                                                                                                                                                                                                                   |       |
| 9  |                    |                      |                                                                                                                                                                                                                   |       |
| 10 | Outcome data       | <a href="#">#15</a>  | Report numbers of outcome events or summary measures. Give information separately for exposed and unexposed groups if applicable.                                                                                 | 13-14 |
| 11 |                    |                      |                                                                                                                                                                                                                   |       |
| 12 |                    |                      |                                                                                                                                                                                                                   |       |
| 13 |                    |                      |                                                                                                                                                                                                                   |       |
| 14 | Main results       | <a href="#">#16a</a> | Give unadjusted estimates and, if applicable, confounder-adjusted estimates and their precision (eg, 95% confidence interval). Make clear which confounders were adjusted for and why they were included          | 13-15 |
| 15 |                    |                      |                                                                                                                                                                                                                   |       |
| 16 |                    |                      |                                                                                                                                                                                                                   |       |
| 17 |                    |                      |                                                                                                                                                                                                                   |       |
| 18 |                    |                      |                                                                                                                                                                                                                   |       |
| 19 | Main results       | <a href="#">#16b</a> | Report category boundaries when continuous variables were categorized                                                                                                                                             | N/A   |
| 20 |                    |                      |                                                                                                                                                                                                                   |       |
| 21 | Main results       | <a href="#">#16c</a> | If relevant, consider translating estimates of relative risk into absolute risk for a meaningful time period                                                                                                      | N/A   |
| 22 |                    |                      |                                                                                                                                                                                                                   |       |
| 23 |                    |                      |                                                                                                                                                                                                                   |       |
| 24 |                    |                      |                                                                                                                                                                                                                   |       |
| 25 | Other analyses     | <a href="#">#17</a>  | Report other analyses done—e.g., analyses of subgroups and interactions, and sensitivity analyses                                                                                                                 | 15-16 |
| 26 |                    |                      |                                                                                                                                                                                                                   |       |
| 27 |                    |                      |                                                                                                                                                                                                                   |       |
| 28 |                    |                      |                                                                                                                                                                                                                   |       |
| 29 | <b>Discussion</b>  |                      |                                                                                                                                                                                                                   |       |
| 30 |                    |                      |                                                                                                                                                                                                                   |       |
| 31 | Key results        | <a href="#">#18</a>  | Summarise key results with reference to study objectives                                                                                                                                                          | 16    |
| 32 |                    |                      |                                                                                                                                                                                                                   |       |
| 33 |                    |                      |                                                                                                                                                                                                                   |       |
| 34 | Limitations        | <a href="#">#19</a>  | Discuss limitations of the study, taking into account sources of potential bias or imprecision. Discuss both direction and magnitude of any potential bias.                                                       | 19-20 |
| 35 |                    |                      |                                                                                                                                                                                                                   |       |
| 36 |                    |                      |                                                                                                                                                                                                                   |       |
| 37 |                    |                      |                                                                                                                                                                                                                   |       |
| 38 |                    |                      |                                                                                                                                                                                                                   |       |
| 39 | Interpretation     | <a href="#">#20</a>  | Give a cautious overall interpretation considering objectives, limitations, multiplicity of analyses, results from similar studies, and other relevant evidence.                                                  | 16-18 |
| 40 |                    |                      |                                                                                                                                                                                                                   |       |
| 41 |                    |                      |                                                                                                                                                                                                                   |       |
| 42 |                    |                      |                                                                                                                                                                                                                   |       |
| 43 |                    |                      |                                                                                                                                                                                                                   |       |
| 44 | Generalisability   | <a href="#">#21</a>  | Discuss the generalisability (external validity) of the study results                                                                                                                                             | 21    |
| 45 |                    |                      |                                                                                                                                                                                                                   |       |
| 46 |                    |                      |                                                                                                                                                                                                                   |       |
| 47 | <b>Other</b>       |                      |                                                                                                                                                                                                                   |       |
| 48 | <b>Information</b> |                      |                                                                                                                                                                                                                   |       |
| 49 |                    |                      |                                                                                                                                                                                                                   |       |
| 50 |                    |                      |                                                                                                                                                                                                                   |       |
| 51 | Funding            | <a href="#">#22</a>  | Give the source of funding and the role of the funders for the present study and, if applicable, for the original study on which the present article is based                                                     | 19    |
| 52 |                    |                      |                                                                                                                                                                                                                   |       |
| 53 |                    |                      |                                                                                                                                                                                                                   |       |
| 54 |                    |                      |                                                                                                                                                                                                                   |       |
| 55 |                    |                      |                                                                                                                                                                                                                   |       |

The STROBE checklist is distributed under the terms of the Creative Commons Attribution License CC-BY.

This checklist was completed on 26. August 2020 using <https://www.goodreports.org/>, a tool made by the

[EQUATOR Network](#) in collaboration with [Penelope.ai](#)

For peer review only - <http://bmjopen.bmj.com/site/about/guidelines.xhtml>

# BMJ Open

## Relationships between Social Spending and Childhood Obesity in OECD Countries: An Ecological Study

|                                 |                                                                                                                                                                                                                                                                                                                                                                                                                                          |
|---------------------------------|------------------------------------------------------------------------------------------------------------------------------------------------------------------------------------------------------------------------------------------------------------------------------------------------------------------------------------------------------------------------------------------------------------------------------------------|
| Journal:                        | <i>BMJ Open</i>                                                                                                                                                                                                                                                                                                                                                                                                                          |
| Manuscript ID                   | bmjopen-2020-044205.R2                                                                                                                                                                                                                                                                                                                                                                                                                   |
| Article Type:                   | Original research                                                                                                                                                                                                                                                                                                                                                                                                                        |
| Date Submitted by the Author:   | 04-Feb-2021                                                                                                                                                                                                                                                                                                                                                                                                                              |
| Complete List of Authors:       | Miyawaki, Atsushi; The University of Tokyo, Department of Public Health, Graduate School of Medicine; University of Tsukuba, Health Services Research and Development Center<br>Evans, Charlotte; University of Leeds, School of Food Science and Nutrition<br>Lucas, Patricia; University of Bristol, School for Policy Studies<br>Kobayashi, Yasuki; The University of Tokyo, Department of Public Health, Graduate School of Medicine |
| <b>Primary Subject Heading</b>: | Global health                                                                                                                                                                                                                                                                                                                                                                                                                            |
| Secondary Subject Heading:      | Paediatrics, Public health, Nutrition and metabolism, Health policy                                                                                                                                                                                                                                                                                                                                                                      |
| Keywords:                       | SOCIAL MEDICINE, Community child health < PAEDIATRICS, Health policy < HEALTH SERVICES ADMINISTRATION & MANAGEMENT, International health services < HEALTH SERVICES ADMINISTRATION & MANAGEMENT                                                                                                                                                                                                                                          |
|                                 |                                                                                                                                                                                                                                                                                                                                                                                                                                          |

SCHOLARONE™  
Manuscripts



I, the Submitting Author has the right to grant and does grant on behalf of all authors of the Work (as defined in the below author licence), an exclusive licence and/or a non-exclusive licence for contributions from authors who are: i) UK Crown employees; ii) where BMJ has agreed a CC-BY licence shall apply, and/or iii) in accordance with the terms applicable for US Federal Government officers or employees acting as part of their official duties; on a worldwide, perpetual, irrevocable, royalty-free basis to BMJ Publishing Group Ltd ("BMJ") its licensees and where the relevant Journal is co-owned by BMJ to the co-owners of the Journal, to publish the Work in this journal and any other BMJ products and to exploit all rights, as set out in our [licence](#).

The Submitting Author accepts and understands that any supply made under these terms is made by BMJ to the Submitting Author unless you are acting as an employee on behalf of your employer or a postgraduate student of an affiliated institution which is paying any applicable article publishing charge ("APC") for Open Access articles. Where the Submitting Author wishes to make the Work available on an Open Access basis (and intends to pay the relevant APC), the terms of reuse of such Open Access shall be governed by a Creative Commons licence – details of these licences and which [Creative Commons](#) licence will apply to this Work are set out in our licence referred to above.

Other than as permitted in any relevant BMJ Author's Self Archiving Policies, I confirm this Work has not been accepted for publication elsewhere, is not being considered for publication elsewhere and does not duplicate material already published. I confirm all authors consent to publication of this Work and authorise the granting of this licence.

1  
2  
3 **Relationships between Social Spending and Childhood Obesity in OECD Countries: An**  
4  
5 **Ecological Study**  
6  
7  
8  
9

10 Atsushi Miyawaki, MD, PhD<sup>1,2</sup>

11 Charlotte E.L. Evans, PhD<sup>3</sup>

12 Patricia J. Lucas, PhD<sup>4</sup>

13 Yasuki Kobayashi, MD, PhD<sup>1</sup>  
14  
15  
16  
17  
18  
19  
20

21 **Affiliations**

22  
23  
24 <sup>1</sup> Department of Public Health, Graduate School of Medicine, The University of Tokyo,  
25  
26 1130033, Japan

27  
28 <sup>2</sup> Health Services Research and Development Center, University of Tsukuba, 3050006, Japan

29  
30  
31 <sup>3</sup> Nutritional Sciences and Epidemiology, School of Food Science and Nutrition, University of  
32  
33 Leeds, LS2 9JT, UK

34  
35  
36 <sup>4</sup> Child Health Research, School for Policy Studies, University of Bristol, BS8 1TZ, UK  
37  
38  
39

40 **Running title:** Social Spending and Childhood Obesity  
41  
42  
43  
44

45 **Corresponding author:**

46 Atsushi Miyawaki, MD, PhD

47 Assistant Professor

48  
49  
50  
51 Department of Public Health, Graduate School of Medicine, The University of Tokyo

52  
53  
54 7-3-1 Hongo, Bunkyo-ku, Tokyo, 1130033, Japan  
55  
56  
57  
58  
59  
60

1  
2  
3  
4  
5  
6  
7  
8  
9  
10  
11  
12  
13  
14  
15  
16  
17  
18  
19  
20  
21  
22  
23  
24  
25  
26  
27  
28  
29  
30  
31  
32  
33  
34  
35  
36  
37  
38  
39  
40  
41  
42  
43  
44  
45  
46  
47  
48  
49  
50  
51  
52  
53  
54  
55  
56  
57  
58  
59  
60

Email: amiyawaki-ky@umin.ac.jp

Phone: +81-3-5841-3494

**Word count:** 3,993 words

**Number of tables:** 3

**Number of figures:** 2

For peer review only



**ABSTRACT** (300 words)

**Objectives:** The burden of childhood obesity is clustered among children in low-socioeconomic groups. Social spending on children—public welfare expenditure on families and education—may curb childhood obesity by reducing socioeconomic disadvantages. The objective of this study was to examine the relationship between social spending on children and childhood obesity across the Organization for Economic Cooperation and Development (OECD) countries.

**Design:** Ecological study.

**Setting:** Data on social spending on children were obtained from the OECD Social Expenditure Database and the OECD educational finance indicators dataset during 2000–2015. Data on childhood obesity were obtained from the NCD Risk Factor Collaboration database.

**Participants:** Aggregated statistics on obesity among children aged 5 to 19 years, estimated for OECD 35 countries based on the measured height and weight on 31.5 million children.

**Outcome Measures:** Country-level prevalence of obesity among children aged 5 to 19 years.

**Results:** In cross-sectional analyses in 2015, social spending on children was inversely associated with the prevalence of childhood obesity after adjusting for potential confounders (the gross domestic product per capita, unemployment rate, poverty rate, percentage of children aged < 20 years and prevalence of childhood obesity in 2000). In addition, when we focused on changes from 2000 to 2015, an average annual increase of 100 US dollars in social spending per child was associated with a decrease in childhood obesity by 0.6 percentage points for girls ( $p = 0.007$ ) and 0.7 percentage points for boys ( $p = 0.04$ ) between 2000 and 2015, after adjusting for the potential confounders. The dimensions of social spending that contributed to these

1  
2  
3 associations between the changes in social spending on children and childhood obesity were  
4  
5 early childhood education and care (ECEC) and school education for girls and ECEC for boys.  
6

7  
8 **Conclusion:** Countries that increase social spending on children tend to experience smaller  
9  
10 increases in childhood obesity.  
11

12  
13  
14 **Keywords:** Social medicine; Community child health; Health policy; International health  
15  
16 services  
17  
18  
19  
20  
21  
22  
23  
24  
25  
26  
27  
28  
29  
30  
31  
32  
33  
34  
35  
36  
37  
38  
39  
40  
41  
42  
43  
44  
45  
46  
47  
48  
49  
50  
51  
52  
53  
54  
55  
56  
57  
58  
59  
60

## ARTICLE SUMMARY

### Strengths and limitations of this study

- This is the first study that has investigated the relationship between public social spending on children and childhood obesity in the Organization for Economic Cooperation and Development (OECD) countries.
- We further focused on which dimensions of public social spending contributed most to these relationships.
- We did not focus on content and generosity of individual social policies nor private social spending. Future work should focus more on the impact of individual social policies on childhood obesity.
- Although our sample included high- and higher middle-income countries, findings were based on OECD countries' data and might not be generalizable to countries outside of this group.

## INTRODUCTION

The prevalence of childhood obesity has almost doubled in high-income countries during the last two decades. Current estimates suggest nearly one in ten children are obese.[1] Obesity in early life is an urgent public health issue due to its subsequent health consequences, including adult obesity,[2] early onset of non-communicable diseases,[3] premature death [3,4], and its influence on children's psychosocial development.[5] Childhood obesity is considered to have substantial economic burdens at the societal and individual level,[6,7]. Policymakers are increasingly responding to this growing public health crisis.

Although the proximal causes of this epidemic of obesity primarily are in individual behaviours such as higher consumption of food high in fat and sugar and increased sedentary behaviour,[8] these factors are shaped by upstream determinants related to socioeconomic conditions and the obesogenic environment.[9] Several studies have demonstrated that low-socioeconomic status of households is a risk factor for childhood obesity.[10,11] For example, those with both less education and lower family income are more likely to consume highly obesogenic fast foods.[12] Recognizing such social determinants of obesity, the World Health Organization (WHO) has recently recommended improving access to high-quality food in disadvantaged families in tandem with policies including taxation on unhealthy food and nutritional labels.[13] Besides these public health interventions, another possible approach is to reduce socioeconomic disadvantage itself, through social protection (e.g., income supplements for families and public investments in education).[14] Although there is a growing literature on the importance of social protection on adult obesity,[15–17] less attention has been paid to the roles of such social

1  
2  
3 protection policies in childhood obesity prevention. This gap partly relates to the difficulty of  
4  
5 estimating social spending at the individual level.  
6  
7  
8  
9

10 Although all high-income countries have social protection programs, there are large cross-  
11  
12 national variations in their generosity.[18,19] *Social spending*—how much the government  
13  
14 spends on social protection [20]—has been considered as an indicator to quantitatively gauge the  
15  
16 generosity of social protection programs in a country or region. Several studies have recently  
17  
18 recognized the importance of social spending as an indicator of macrosocial determinants of  
19  
20 health and demonstrated the association between social spending and better population health  
21  
22 outcomes including life expectancy, infant mortality, and low birth weight.[18,21] If the same  
23  
24 macrosocial determinants are drivers of childhood obesity, increasing social spending on  
25  
26 children will similarly operate as an upstream approach to curb childhood obesity. The possible  
27  
28 mechanisms may include tax credits and paid parental leave, that increase or stabilize household  
29  
30 income, or food vouchers offered to low-income families, which enable them to improve the  
31  
32 quality of family meals.[22] Higher quality nutritional and physical education at school also  
33  
34 encourages children to have a healthier diet and to be more active.[23] However, little is known  
35  
36 so far about the relationship between gross public social spending on children and childhood  
37  
38 obesity.  
39  
40  
41  
42  
43  
44  
45  
46

47 To bridge this knowledge gap, in this study, we sought to answer the following questions using  
48  
49 data from the Organization for Economic Cooperation and Development (OECD) countries.  
50

51 First, is social spending on children associated with the prevalence of childhood obesity?

52  
53 Second, if so, which types of social spending contribute to this association? In this study, we  
54  
55  
56  
57  
58  
59  
60

1  
2  
3 focus on between-country differences, considering gross social spending as a macrosocial  
4 indicator. The mechanisms via which social spending may influence childhood obesity are  
5 numerous and, at the individual level, childhood obesity is likely better predicted by individual  
6 circumstance. To estimate the impact of macro-economic policies, we report on differences at  
7 this level.  
8  
9  
10  
11  
12  
13  
14  
15  
16

## 17 **METHODS**

### 18 **Study design and sample**

19 We conducted a panel data analysis of 35 OECD countries using the NCD Risk Factor  
20 Collaboration (NCD-RisC) database,[24] which provides trends of childhood obesity during  
21 1975–2016 in 200 countries. We examined social spending on children using (1) the OECD  
22 Social Expenditure Database (SOCX) [25] and (2) the OECD educational finance indicators  
23 dataset.[26] The SOCX database includes internationally comparable statistics on public social  
24 spending (“public” means “by the central, state, or local government” [20]) across 35 OECD  
25 countries. The spending is categorised into “old age,” “survivors,” “incapacity related,” “family,”  
26 “active labour market program,” “unemployment,” “housing,” and “other social policy areas.”  
27 We focused on the category “family” because this category is most likely to measure direct  
28 benefits to children.[27] Although we anticipate that children will benefit from indirect spending  
29 on, for example, unemployment programs and housing, including these categories would  
30 overestimate the sums reaching families with children. We did not include private social  
31 spending (“private” means that it came from other sources than the general government) because  
32 it was not available for most countries in the SOCX dataset. Although education is considered as  
33 an essential aspect of social spending,[19] spending on school education is not included in the  
34  
35  
36  
37  
38  
39  
40  
41  
42  
43  
44  
45  
46  
47  
48  
49  
50  
51  
52  
53  
54  
55  
56  
57  
58  
59  
60

1  
2  
3 SOCX datasets (early childhood education and care [ECEC] is included). Thus, we obtained  
4 information on public social spending on school education from the OECD's educational finance  
5 indicators dataset. Furthermore, we examined several country-level sociodemographic variables,  
6 including the population of children aged < 20 years, the gross domestic product [GDP] per  
7 capita, unemployment rate, and poverty rate, using the OECD.Stat database.[28] We examined  
8 data during 2000–2015, for which reliable data on both childhood obesity and social spending  
9 were available. We excluded Lithuania from all analyses due to missing data in most years.  
10  
11  
12  
13  
14  
15  
16  
17  
18  
19  
20

## 21 **Measures**

### 22 Outcome variable: Prevalence of childhood obesity

23  
24 We used the age-standardised prevalence (%) of childhood obesity among children aged 5 to 19  
25 years (standardised to the WHO standard population), which has been estimated by sex using a  
26 Bayesian hierarchical model based on the measured height and weight on 31.5 million  
27 children.[24] Childhood obesity was defined as more than two standard deviations above the age  
28 and sex-specific WHO growth reference median.[29]  
29  
30  
31  
32  
33  
34  
35  
36  
37  
38  
39

### 40 Exposure variable: Social spending on children

41  
42 Our primary exposure variable was total social spending on children, which was defined as the  
43 sum of (1) public social spending on family, which includes benefits on family allowance,  
44 maternal and parental leave, ECEC, and others (the components are shown in **online**  
45 **supplemental table Table S1**),[25] and (2) public social spending on school education (primary  
46 to post-secondary non-tertiary). Specifically, public social spending on family includes (a) Child-  
47 related cash transfers to families with children, including income-tested child allowances, public  
48  
49  
50  
51  
52  
53  
54  
55  
56  
57  
58  
59  
60

1  
2  
3 income support payments during periods of parental leave, and income support for single-parent  
4 families; (b) public spending on services for families with children, including the direct  
5 subsidisation of childcare and ECEC facilities, public childcare support through earmarked  
6 payments to parents, and home help services for families; (c) financial support for families via  
7 the tax system, including child tax allowances and tax credits.[30] Public social spending on  
8 school education includes direct expenditure on educational institutions (e.g., public spending on  
9 instruction services, university research, and ancillary services such as meals and transport to  
10 schools) as well as education-related public subsidies given to households and administered by  
11 educational institutions.[26,31] Social spending on children was expressed as the purchasing  
12 power parity (PPP)-adjusted United States (US) dollars (fixed price, 2010 as the baseline year)  
13 per child aged < 20 years.

14  
15  
16  
17  
18  
19  
20  
21  
22  
23  
24  
25  
26  
27  
28  
29  
30  
31 Our secondary exposure variables were five dimensions of social spending on children (family  
32 allowance, maternal and parental leave, ECEC, school education, and other benefits). This  
33 disaggregation of social spending on children was conducted following the OECD's datasets to  
34 examine which dimensions of social spending contributed to the relationship between the social  
35 spending on children and childhood obesity.

### 36 37 38 39 40 41 42 43 44 Adjustment variables

45  
46  
47 We adjusted for countries' demographics and the "baseline" prevalence of childhood obesity in  
48 2000. Demographics consisted of three economic indicators (GDP per capita, unemployment rate  
49 and poverty rate) and the percentage of children aged < 20 years, because these factors could  
50 affect both the social spending on children [19] and the prevalence of childhood obesity. The  
51  
52  
53  
54  
55  
56  
57  
58  
59  
60



1  
2  
3 “baseline” prevalence of childhood obesity was also included as countries that had suffered from  
4 high obesity prevalence in the past may invest more in social programs to mitigate against  
5 childhood obesity.  
6  
7  
8  
9

### 10 11 12 **Statistical analysis** 13

14 Basic social characteristics derived across the included OECD countries in 2015 were: GDP per  
15 capita (PPP-adjusted US dollars), unemployment rate (for the total population), poverty rate (the  
16 ratio of the number of people aged 18–65 years whose income falls below half the median  
17 household income of the total population, before tax and transfer), and children aged < 20 years  
18 as a percentage of total population.  
19  
20  
21  
22  
23  
24  
25  
26  
27

28 Next, we cross-sectionally investigated the relationship between total social spending on children  
29 and childhood obesity across OECD countries, using 2015 data. We plotted the prevalence of  
30 childhood obesity against social spending on children and estimated the correlation between  
31 them using a Pearson’s correlation. We also examined the association between them, by using a  
32 multivariable linear regression model that adjusted for the demographic indicators (GDP per  
33 capita, unemployment rate, poverty rate, and percentage of children aged < 20 years) in 2015,  
34 and the prevalence of childhood obesity in 2000. The analyses were separately conducted for  
35 each sex here (and hereafter) because the pattern of childhood obesity varied by sex across  
36 countries.[1] In this analysis, we substituted the latest year data for Denmark, Poland,  
37 Netherlands, and New Zealand, for which 2015 data on social spending were unavailable.  
38  
39  
40  
41  
42  
43  
44  
45  
46  
47  
48  
49  
50  
51  
52  
53  
54  
55  
56  
57  
58  
59  
60

1  
2  
3 Then, to effectively investigate the association between social spending on children and  
4 childhood obesity within the same country, we examined the longitudinal trends in total social  
5 spending on children and childhood obesity during the period 2000–2015. To account for the  
6 difference in economic growth by countries, we first estimated the average annual growth in  
7 social spending on children adjusted by the growth in GDP per capita for each country using  
8 linear regression (**online supplemental method S1**). Next, we illustrated the association  
9 between the growth in social spending and childhood obesity by plotting the absolute change in  
10 the prevalence of childhood obesity from 2000 to 2015 against the average annual change in  
11 social spending on children for countries and estimating the correlation between them using a  
12 Pearson's correlation. We then investigated the association between them, by using a  
13 multivariable linear regression model that adjusted for the changes in demographic indicators  
14 (unemployment rate, poverty rate, and percentage of children aged < 20 years) from 2000 to  
15 2015 and the prevalence of childhood obesity in 2000. In this longitudinal analysis, we  
16 substituted the latest year data/the earliest year data when the 2015/2000 data were unavailable.  
17  
18 Finally, we used the secondary exposure variables, by replacing total social spending on children  
19 with five dimensions of social spending on children (family allowance, maternal and parental  
20 leave, ECEC, school education, and other benefits), and repeated multivariable linear  
21 regressions.[16] In this analysis, we examined 29 OECD countries for which information on all  
22 the dimensions of social spending on children were available (Denmark, Mexico, Netherlands,  
23 New Zealand, Poland, and the United States were excluded). All analyses were conducted using  
24 Stata version 15 (College Station, TX; StataCorp LLC.).  $P < 0.05$  was considered as statistically  
25 significant.  
26  
27  
28  
29  
30  
31  
32  
33  
34  
35  
36  
37  
38  
39  
40  
41  
42  
43  
44  
45  
46  
47  
48  
49  
50  
51  
52  
53  
54  
55  
56  
57  
58  
59  
60

## Post-hoc analyses

To investigate potential heterogeneous effects according to economic development, we divided OECD countries in half according to GDP per capita in 2000 and repeated the regression analyses for each group (i.e., countries with lower vs countries with upper GDP per capita).

## Patient and public involvement

The current study involved secondary use of publicly available aggregated data. The study did not involve patients and the public in any way and did not require ethics review.

## RESULTS

### Basic characteristics across OECD countries

PPP-adjusted GDP per capita varied across OECD countries in 2015, ranging from \$16,660 in Mexico to \$87,825 in Luxembourg (**Table 1**). The unemployment rate was 7.9% on average, ranging from 3.4% in Japan to 24.9% in Greece. The poverty rate was 20.0% on average, ranging from 8.8% in Switzerland to 29.9% in Ireland. Children aged < 20 years accounted for 23.1% of the total population on average, ranging from 17.3% in Japan to 37.2% in Mexico.

### Cross-sectional analysis of social spending and childhood obesity

The prevalence of childhood obesity varied across OECD countries in 2015, lowest in Japan (1.7% for girls and 5.0% for boys) and highest in New Zealand (14.7% and 17.1%) with the US as an outlier (19.3% and 23.0%) (**Figure 1**). There was considerable variation in PPP-adjusted social spending on children. Luxemburg was the highest spender, with social spending on

1  
2  
3 children amounting to \$24,350 per child. The lowest spender was Mexico, which spent \$1,901  
4 per child. When splitting countries into two groups (the upper versus lower half of the population  
5 proportion of children) and comparing social spending on children in 2015, there was no  
6 substantial difference (mean \$10,785 versus \$8,586;  $p=0.18$  in Brunner-Munzel test). The  
7 relationship between social spending on children and the prevalence of childhood obesity was  
8 moderate and inverse for girls (Pearson's  $r=-0.32$ ;  $p=0.06$ ) and boys ( $r=-0.35$ ;  $p=0.04$ ). Since  
9 the US appeared to be an outlier for childhood obesity, we conducted a post-hoc estimation of  
10 correlation coefficients by excluding the US data, but the associations were qualitatively  
11 unchanged ( $r=-0.37$ ;  $p=0.03$  for girls and  $r=-0.40$ ;  $p=0.02$  for boys). After we adjusted for  
12 potential confounders (**Table 2**), we found that countries with higher total social spending on  
13 children experienced lower prevalence of childhood obesity ( $\beta = -0.3 \times 10^{-3}$ ;  $p = 0.01$  for girls  
14 and  $\beta = -0.4 \times 10^{-3}$ ;  $p = 0.02$  for boys).

### 33 **Longitudinal analysis of social spending and childhood obesity**

34  
35 During the period 2000–2015, all countries experienced increases in the prevalence of childhood  
36 obesity, with the exception of girls in Denmark (**Figure 2**). When we examined the changes in  
37 social spending adjusted by the growth in GDP per capita and changes in the prevalence of  
38 childhood obesity, we observed a moderate inverse association between these variables for girls  
39 (Pearson's  $r=-0.49$ ;  $p<0.01$ ) and a weak inverse association for boys ( $r=-0.28$ ;  $p=0.10$ ). After  
40 we adjusted for potential confounders (**Table 3**), we found that countries with greater increases  
41 in total social spending on children also had smaller increases in the prevalence of childhood  
42 obesity ( $\beta = -0.6 \times 10^{-2}$ ;  $p = 0.007$  for girls and  $\beta = -0.7 \times 10^{-2}$ ;  $p = 0.04$  for boys). These  
43 estimates indicate that a 100 US dollars average annual increase (adjusted by PPP and GDP per  
44  
45  
46  
47  
48  
49  
50  
51  
52  
53  
54  
55  
56  
57  
58  
59  
60

capita) per child was associated with a decline in childhood obesity between 2000 and 2015 by 0.6% for girls and 0.7% for boys.

### Disaggregated social spending and childhood obesity

Patterns of spending on specific dimensions within the gross social spending figure varied considerably between countries (**online supplemental figure S1**). On average, 14.5% of social spending on children was used for family allowance, 6.4% for maternal and parental leave, 12.4% for ECEC, 56.2% for school education, and 10.4% for other benefits in 2015. When we focused on the specific dimensions of social spending in cross-sectional analyses (**Table 2**), we found no evidence that either dimension of social spending on children was associated with the prevalence of childhood obesity. However, when we focused on the changes over time (**Table 3**), we found an inverse association between the change in spending on ECEC and in the prevalence of childhood obesity for girls ( $\beta = -1.2 \times 10^{-2}$ ;  $p = 0.045$ ) and boys ( $\beta = -2.1 \times 10^{-2}$ ;  $p = 0.049$ ). We also found an inverse relationship between the change in spending on school education and the growth in childhood obesity for girls ( $\beta = -1.1 \times 10^{-2}$ ;  $p = 0.01$ ), but not for boys ( $\beta = -0.5 \times 10^{-2}$ ;  $p = 0.43$ ). The change in social spending on family allowance, maternal leave and other benefits were not associated with the growth in the prevalence of childhood obesity for either sex.

### Post-hoc analyses

In the stratified analyses according to GDP per capita in 2000, the cross-sectional inverse relationship between total social spending on children and prevalence of childhood obesity was observed among countries with higher GDP per capita ( $p = 0.03$  for girls and  $p = 0.04$  for boys)

1  
2  
3 **(online supplemental table S2)**. When focusing on disaggregated social spending, we found a  
4 cross-sectional inverse association between social spending on maternal and parental leave and  
5 prevalence of childhood obesity for boys among countries with lower GDP per capita ( $p = 0.02$ ).  
6  
7 In longitudinal analyses, the coefficients for the association between the changes in total social  
8 spending and changes in the prevalence of childhood obesity remained negative; however, they  
9 did not reach statistical significance regardless of the level of GDP per capita and sex (**online  
10 supplemental table S3**).  
11  
12  
13  
14  
15  
16  
17  
18  
19  
20  
21

## 22 **DISCUSSION**

23  
24 Among OECD countries, we found an inverse association between the growth in social spending  
25 on children and childhood obesity, after accounting for the underlying difference in social factors  
26 that could drive social spending and childhood obesity. What contributed most to this association  
27 was social spending on education: ECEC for both sexes, and social spending on school education  
28 also contributed notably for girls. These results suggest that OECD countries whose social  
29 spending on children increase more tend to experience smaller increases in childhood obesity  
30 prevalence in a context where all countries except Denmark showed increasing prevalence in  
31 childhood obesity. These findings may highlight the importance of social protection programs as  
32 macrosocial determinants of childhood obesity.  
33  
34  
35  
36  
37  
38  
39  
40  
41  
42  
43  
44  
45  
46

47 It is not clear why the inverse association between social spending and childhood obesity exist,  
48 but the finding that the relationship between social spending on children and childhood obesity  
49 varies by dimensions of social spending may help to determine the possible mechanisms of this  
50 association. Notably, social spending on ECEC was associated with reduced obesity growth rates  
51  
52  
53  
54  
55  
56  
57  
58  
59  
60

1  
2  
3 for both girls and boys. Moreover, school education was associated with reduced growth of  
4 obesity among girls. Spending on these education categories may enrich nutritional and physical  
5 activity environments that protect against obesity, such as higher quality school meals,[32,33]  
6 limited access to energy-dense competitive foods and beverages at school,[34,35] and better  
7 access to playing fields.[36] Conversely, schools under financial pressures may adopt unhealthy  
8 food policy (sales or advertising of snack foods) in schools or cancel gym classes in order to  
9 improve school budgets.[37] If the high-quality educational environment is protective against  
10 childhood obesity, we might predict that public ECEC spending would have a particularly  
11 important role since it will increase both quality (e.g. through increasing staff-to-child ratios) and  
12 uptake (in a context where ECEC is not mandatory in most OECD countries). For example,  
13 Norway is the highest ECEC spender, has mandatory subsidized childcare from 1 year, and  
14 provides the highest quality of ECEC among developed countries;[35] and has low growth in  
15 obesity rates within the OECD. This relationship with public ECEC spending is particularly  
16 interesting since maternal employment and use of childcare in the earliest years (largely financed  
17 privately) have been associated with higher rates of obesity.[38–40] Our finding supports the  
18 view that the reason early childcare is associated with obesity is that it is often lower quality and  
19 highly constrained,[40] suggesting the importance of public spending on high quality care for  
20 reducing childhood obesity. In contrast, in the context of universal provision of school education,  
21 the school environment may be more important for girls than boys in influencing levels of  
22 physical activity.[41] However, this mechanism may depend on the social context; another study  
23 in the US showed that the protective effect of increased physical education on obesity was  
24 concentrated among boys because girls substituted physical education for other activities.[42]  
25  
26 Other possible mechanisms may be through children's health literacy and socioeconomic

1  
2  
3 conditions in the future resulting from public investments in education.[43] However, without  
4  
5 further breakdown of categories of social spending, we can only provide plausible suggestions  
6  
7 for what might account for these observed associations.  
8  
9

### 10 11 12 **Comparison with other studies** 13

14 Our findings add to a body of work that has explored the relationship between social protection,  
15 especially social spending as its indicator, and population health outcomes. Bradley and  
16  
17 colleagues demonstrated a link between public social spending and better population health  
18  
19 measures in terms of life expectancy, infant mortality rate, and low birth weight across OECD  
20  
21 countries.[18] They also found similar associations in the US between social spending and better  
22  
23 health outcomes, including the lower prevalence of adult obesity.[21] A study by Shim further  
24  
25 found that social spending on children, especially spending on the family allowance, was  
26  
27 associated with reduced infant mortality in OECD 19 countries.[27] In Canada, Ng and  
28  
29 Muntaner found that indicators of welfare generosity, including social spending on  
30  
31 postsecondary education, were associated with reduced mortality.[44] There is also a growing  
32  
33 literature on the effect of social programmes and education on adult obesity.[15–17] Our study  
34  
35 extends these previous studies by further focusing on childhood obesity, one of the top public  
36  
37 health issues in the modern context, and therefore reinforces the key roles of social protection  
38  
39 policies and social spending as their indicator in population health.  
40  
41  
42  
43  
44  
45  
46  
47  
48

### 49 **Strengths and limitations of this study** 50

51 This is the first study that has investigated the relationship between social spending on children  
52  
53 and childhood obesity. We further focused on which dimensions of public social spending  
54  
55  
56  
57  
58  
59  
60



1  
2  
3 contributed most to these relationships. Moreover, we tested the association between social  
4 spending and childhood obesity more robustly by examining the association between  
5 longitudinal changes as well as cross-sectional relationships. This would have helped to adjust  
6 for unobserved country-specific characteristics. For example, the fact that the US was a clear  
7 outlier in the cross-sectional analysis might be due to the country's traditional food and  
8 agricultural policies that encourages overconsumption.[45] These factors would have been  
9 effectively controlled for in the longitudinal analysis but not in the cross-sectional analysis.  
10  
11  
12  
13  
14  
15  
16  
17  
18  
19  
20

21 Our study has limitations. First, as in any ecological study unmeasured confounding will have  
22 influenced our findings. For example, countries that spend more of social spending for families,  
23 may also spend more on public health activities for the prevention of childhood obesity (e.g.,  
24 food labelling and sugar tax) or other social protection programs that can be protective against  
25 childhood obesity at the population level (e.g., housing and labour market programs).[46,47]  
26  
27  
28  
29  
30  
31  
32  
33 Second, we analysed only 35 countries at most, which limits the number of possible adjustment  
34 variables that could be included in the regression analyses. Third, our study was unable to  
35 identify the exact mechanisms through which social spending was inversely associated with  
36 childhood obesity, even though we broke down social spending into several dimensions. We did  
37 not have information on individual social policies (e.g., child care quality and availability or free  
38 school meals), and it was difficult to isolate the effect of individual social policies. Nevertheless,  
39 our findings suggest that public social spending in the broadest sense may be an important  
40 macro-level indicator of child health and wellbeing, such as childhood obesity. Future work  
41 should focus more directly on the impact of individual social policies on childhood obesity.  
42  
43  
44  
45  
46  
47  
48  
49  
50  
51  
52  
53  
54 Fourth, the change in social spending on children does not appear to explain all the variation of  
55  
56  
57  
58  
59  
60

1  
2  
3 the growth in the prevalence of childhood obesity. For example, Japan, Belgium, and Denmark  
4 had a smaller growth in childhood obesity compared to the fitted lines, while several countries,  
5 including Hungary, Mexico, and Turkey, experienced a larger growth. Therefore, even when this  
6 association is causal, the effect of increasing social spending on children on the prevalence of  
7 childhood obesity in an individual country may differ by the country's characteristics such as  
8 economic inequalities and cultural factors related to food and physical activity. Fifth, our study  
9 captures obesity across a wide age range (5-19 years), while many of these policies are age  
10 dependent (e.g. school impacts are likely to be cumulative after school starting age). Finally, our  
11 analysis did not include private social spending. Private social spending may act to partially  
12 counter the redistributive impact of public social spending.[48] Further studies on how changes  
13 in the public and private mix in social spending may affect childhood obesity may be required.  
14  
15  
16  
17  
18  
19  
20  
21  
22  
23  
24  
25  
26  
27  
28  
29  
30

31 Although our sample includes both high- and higher middle-income countries, findings were  
32 based on OECD countries' data and might not be generalizable to countries outside of this group.  
33  
34  
35  
36  
37

## 38 CONCLUSIONS

39  
40 In summary, we found that OECD countries with larger increases in social spending on children  
41 between 2000 and 2015 tended to experience a smaller increase in childhood obesity over the  
42 same period. This association appeared to be explained mainly by the change in social spending  
43 on early childhood education and care and school education. Our findings may highlight the  
44 importance of social spending as a macrosocial indicator in childhood obesity.  
45  
46  
47  
48  
49  
50  
51  
52  
53  
54  
55  
56  
57  
58  
59  
60

## FUNDING

A.M. was supported by Japan Society for the Promotion of Science (18J13078 and 20K18956).

C.E. was supported by a mobility award from the University of Leeds (grant number is not applicable).

## AUTHOR CONTRIBUTIONS

A.M. and C.E. conceived the study design. A.M. analysed data. A.M., C.E., P.L., and Y.K. interpreted the data. All authors contributed to the draft manuscript and have approved the final version.

## DATA STATEMENT

The datasets are available from the following websites: NCD-RisC datasets (<http://ncdrisc.org>), OECD SOCX datasets (<https://www.oecd.org/social/expenditure.htm>), and the public spending on education datasets ([https://www.oecd-ilibrary.org/education/public-spending-on-education/indicator/english\\_f99b45d0-en](https://www.oecd-ilibrary.org/education/public-spending-on-education/indicator/english_f99b45d0-en)).

## CONFLICTS OF INTEREST

The authors have no conflicts of interest to disclose.

## REFERENCES

- 1 Ng M, Fleming T, Robinson M, *et al.* Global, regional, and national prevalence of overweight and obesity in children and adults during 1980–2013: a systematic analysis for the Global Burden of Disease Study 2013. *Lancet* 2014;**384**:766–81. doi:10.1016/S0140-6736(14)60460-8
- 2 Wang LY, Chyen D, Lee S, *et al.* The Association between body mass index in adolescence and obesity in adulthood. *J Adolesc Health* 2008;**42**:512–8. doi:10.1016/j.jadohealth.2007.10.010
- 3 Reilly JJ, Kelly J. Long-term impact of overweight and obesity in childhood and adolescence on morbidity and premature mortality in adulthood: systematic review. *Int J Obes* 2011;**35**:891–8. doi:10.1038/ijo.2010.222
- 4 Strand BH, Kuh D, Shah I, *et al.* Childhood, adolescent and early adult body mass index in relation to adult mortality: results from the British 1946 birth cohort. *J Epidemiol Community Health* 2012;**66**:225–32. doi:10.1136/jech.2010.110155
- 5 Daniels SR, Arnett DK, Eckel RH, *et al.* Overweight in children and adolescents: Pathophysiology, consequences, prevention, and treatment. *Circulation* 2005;**111**:1999–2012. doi:10.1161/01.CIR.0000161369.71722.10
- 6 Cawley J. The Economics of childhood obesity. *Health Aff (Millwood)* 2010;**29**:364–71. doi:10.1377/hlthaff.2009.0721
- 7 Popkin BM, Kim S, Rusev ER, *et al.* Measuring the full economic costs of diet, physical activity and obesity-related chronic diseases. *Obes Rev* 2006;**7**:271–93. doi:10.1111/j.1467-789X.2006.00230.x
- 8 Lobstein T, Jackson-Leach R, Moodie ML, *et al.* Child and adolescent obesity: Part of a bigger picture. *Lancet* 2015;**385**:2510–20. doi:10.1016/S0140-6736(14)61746-3
- 9 Swinburn B, Egger G, Raza F. Dissecting obesogenic environments: The development and application of a framework for identifying and prioritizing environmental interventions for obesity. *Preventive Medicine* 1999;**29**:563–70. doi:10.1006/pmed.1999.0585
- 10 Bammann K, Gwozdz W, Lanfer A, *et al.* Socioeconomic factors and childhood overweight in Europe: results from the multi-centre IDEFICS study: Socioeconomic factors and childhood overweight. *Pediatr Obes* 2013;**8**:1–12. doi:10.1111/j.2047-6310.2012.00075.x
- 11 Ueda P, Kondo N, Fujiwara T. The global economic crisis, household income and pre-adolescent overweight and underweight: a nationwide birth cohort study in Japan. *Int J Obes* 2015;**39**:1414–20. doi:10.1038/ijo.2015.90
- 12 Townshend T, Lake A. Obesogenic environments: current evidence of the built and food environments. *Perspect Public Health* 2017;**137**:38–44. doi:10.1177/1757913916679860

- 1  
2  
3 13 World Health Organization. Report of the Commission on Ending Childhood Obesity:  
4 implementation plan. Geneva: 2017. [http://apps.who.int/gb/ebwha/pdf\\_files/WHA70/A70\\_31-](http://apps.who.int/gb/ebwha/pdf_files/WHA70/A70_31-en.pdf)  
5 [en.pdf](http://apps.who.int/gb/ebwha/pdf_files/WHA70/A70_31-en.pdf)  
6  
7  
8 14 Lundberg O, Yngwe MÅ, Stjärne MK, *et al.* The role of welfare state principles and  
9 generosity in social policy programmes for public health: an international comparative study.  
10 *Lancet* 2008;**372**:1633–40. doi:10.1016/S0140-6736(08)61686-4  
11  
12 15 Levasseur P. Can social programs break the vicious cycle between poverty and obesity?  
13 Evidence from urban Mexico. *World Development* 2019;**113**:143–56.  
14 doi:10.1016/j.worlddev.2018.09.003  
15  
16 16 Nagano H, Puppim de Oliveira JA, Barros AK, *et al.* The ‘Heart Kuznets Curve’?  
17 Understanding the relations between economic development and cardiac conditions. *World*  
18 *Development* 2020;**132**:104953. doi:10.1016/j.worlddev.2020.104953  
19  
20 17 Etile F. Education policies and health inequalities: Evidence from changes in the  
21 distribution of Body Mass Index in France, 1981–2003. *Economics & Human Biology*  
22 2014;**13**:46–65. doi:10.1016/j.ehb.2013.01.002  
23  
24 18 Bradley EH, Elkins BR, Herrin J, *et al.* Health and social services expenditures:  
25 associations with health outcomes. *BMJ Qual Saf* 2011;**20**:826–31.  
26 doi:10.1136/bmjqs.2010.048363  
27  
28 19 Papanicolas I, Woskie LR, Orlander D, *et al.* The Relationship between health spending  
29 and social spending In high-income countries: How does the US compare? *Health Aff*  
30 *(Millwood)* 2019;**38**:1567–75. doi:10.1377/hlthaff.2018.05187  
31  
32 20 OECD. OECD Data: Social spending. 2019. doi:10.1787/soc\_glance-2019-en  
33  
34 21 Bradley EH, Canavan M, Rogan E, *et al.* Variation in health outcomes: The role of  
35 spending on social services, public health, and health care, 2000–09. *Health Aff (Millwood)*  
36 2016;**35**:760–8. doi:10.1377/hlthaff.2015.0814  
37  
38 22 Griffith R, von Hinke S, Smith S. Getting a healthy start: The effectiveness of targeted  
39 benefits for improving dietary choices. *J Health Econ* 2018;**58**:176–87.  
40 doi:10.1016/j.jhealeco.2018.02.009  
41  
42 23 Majdzadeh R, Taghdisi M-H, Jazayeri S, *et al.* Effect of school-based interventions to  
43 control childhood obesity: A review of reviews. *Int J Prev Med* 2015;**6**:68. doi:10.4103/2008-  
44 7802.162059  
45  
46 24 Worldwide trends in body-mass index, underweight, overweight, and obesity from 1975  
47 to 2016: a pooled analysis of 2416 population-based measurement studies in 128·9 million  
48 children, adolescents, and adults. *Lancet* 2017;**390**:2627–42. doi:10.1016/S0140-  
49 6736(17)32129-3  
50  
51  
52  
53  
54  
55  
56  
57  
58  
59  
60

- 1  
2  
3 25 OECD. Social Expenditure Database (SOCX).  
4 2019.<https://www.oecd.org/social/expenditure.htm> (accessed 20 Nov 2019).  
5  
6  
7 26 OECD. Public spending on education (indicator). Published Online First: 2019.doi:  
8 10.1787/f99b45d0-en (accessed 20 Nov 2011).  
9  
10 27 Shim J. Social welfare expenditures and infant mortality. *Social Work in Public Health*  
11 2015;**30**:567–77. doi:10.1080/19371918.2015.1073648  
12  
13 28 OECD. OECD.Stat. 2019.<https://doi.org/10.1787/data-00285-en> (accessed 20 Nov 2019).  
14  
15 29 de Onis M. Development of a WHO growth reference for school-aged children and  
16 adolescents. *Bull World Health Organ* 2007;**85**:660–7. doi:10.2471/BLT.07.043497  
17  
18 30 OECD. PF1.1: Public spending on family benefits.  
19 [http://www.oecd.org/els/soc/PF1\\_1\\_Public\\_spending\\_on\\_family\\_benefits.pdf](http://www.oecd.org/els/soc/PF1_1_Public_spending_on_family_benefits.pdf) (accessed 25  
20 Aug 2020).  
21  
22  
23 31 OECD. Indicator B1: How much is spent per student? In: *Education at a Glance 2014:*  
24 *OECD Indicators*. 2014. [http://www.oecd.org/education/EAG2014-](http://www.oecd.org/education/EAG2014-Indicator%20B1%20(eng).pdf)  
25 *Indicator%20B1%20(eng).pdf* (accessed 25 Aug 2020).  
26  
27 32 Miyawaki A, Lee JS, Kobayashi Y. Impact of the school lunch program on overweight  
28 and obesity among junior high school students: a nationwide study in Japan. *J Pub Health*  
29 2019;**41**:362–70. doi:10.1093/pubmed/fdy095  
30  
31  
32 33 Jaime PC, Lock K. Do school based food and nutrition policies improve diet and reduce  
33 obesity? *Preventive Medicine* 2009;**48**:45–53. doi:10.1016/j.ypmed.2008.10.018  
34  
35 34 Council of School Health, Committee on Nutrition. Snacks, Sweetened Beverages,  
36 Added Sugars, and Schools. *Pediatrics* 2015;**135**:575–83. doi:10.1542/peds.2014-3902  
37  
38 35 World Health Organization. School policy framework: Implementation of the WHO  
39 global strategy on diet, physical activity and health. Geneva: 2008.  
40 <http://www.who.int/dietphysicalactivity/SPF-en-2008.pdf>  
41  
42  
43 36 World Health Organization. Promoting physical activity in schools: An important  
44 element of a health-promoting school.  
45 2007.[https://apps.who.int/iris/bitstream/handle/10665/43733/9789241595995\\_](https://apps.who.int/iris/bitstream/handle/10665/43733/9789241595995_eng.pdf?sequence=1&isAllowed=y)  
46 [eng.pdf?sequen](https://apps.who.int/iris/bitstream/handle/10665/43733/9789241595995_eng.pdf?sequence=1&isAllowed=y)  
47 [ce=1&isAllowed=y](https://apps.who.int/iris/bitstream/handle/10665/43733/9789241595995_eng.pdf?sequence=1&isAllowed=y) (accessed 10 Dec 2019).  
48  
49 37 Anderson PM, Butcher KF. Reading, writing, and refreshments: Are school finances  
50 contributing to children’s obesity? *J Human Resources* 2006;**XLI**:467–94.  
51 doi:10.3368/jhr.XLI.3.467  
52  
53 38 Pearce A, Li L, Abbas J, *et al*. Is childcare associated with the risk of overweight and  
54 obesity in the early years? Findings from the UK Millennium Cohort Study. *Int J Obes*  
55 2010;**34**:1160–8. doi:10.1038/ijo.2010.15  
56  
57  
58  
59  
60

- 1  
2  
3 39 Hawkins SS, Cole TJ, Law C, *et al*. Maternal employment and early childhood  
4 overweight: findings from the UK Millennium Cohort Study. *Int J Obes* 2008;**32**:30–8.  
5 doi:10.1038/sj.ijo.0803682  
6  
7  
8 40 Swyden K, Sisson SB, Lora K, *et al*. Association of childcare arrangement with  
9 overweight and obesity in preschool-aged children: a narrative review of literature. *Int J Obes*  
10 2017;**41**:1–12. doi:10.1038/ijo.2016.198  
11  
12 41 Jago R, Anderson C, Baranowski T, *et al*. Adolescent patterns of physical activity.  
13 Differences by gender, day, and time of day. *Am J Prev Med* 2005;**28**:447–52.  
14 doi:10.1016/j.amepre.2005.02.007  
15  
16 42 Cawley J, Frisvold D, Meyerhoefer C. The impact of physical education on obesity  
17 among elementary school children. *Journal of Health Economics* 2013;**32**:743–55.  
18 doi:10.1016/j.jhealeco.2013.04.006  
19  
20 43 Ruel MT, Alderman H. Nutrition-sensitive interventions and programmes: how can they  
21 help to accelerate progress in improving maternal and child nutrition? *Lancet* 2013;**382**:536–  
22 51. doi:10.1016/S0140-6736(13)60843-0  
23  
24 44 Ng E, Muntaner C. Welfare generosity and population health among Canadian provinces:  
25 a time-series cross-sectional analysis, 1989–2009. *J Epidemiol Community Health*  
26 2015;**69**:970–7. doi:10.1136/jech-2014-205385  
27  
28 45 Nestle M. *Food politics: how the food industry influences nutrition and health*.  
29 Berkeley: : University of California Press 2007.  
30  
31 46 Kirkpatrick SI, Tarasuk V. Housing circumstances are associated with household food  
32 access among low-income urban families. *J Urban Health* 2011;**88**:284–96.  
33 doi:10.1007/s11524-010-9535-4  
34  
35 47 Oddo VM, Nicholas LH, Bleich SN, *et al*. The impact of changing economic conditions  
36 on overweight risk among children in California from 2008 to 2012. *J Epidemiol Community*  
37 *Health* 2016;**70**:874–80. doi:10.1136/jech-2015-207117  
38  
39 48 Goudswaard K, Caminada K. The redistributive effect of public and private social  
40 programmes: A cross-country empirical analysis. *International Social Security Review*  
41 2010;**63**:1–19. doi:10.1111/j.1468-246X.2009.01351.x  
42  
43  
44  
45  
46  
47  
48  
49  
50  
51  
52  
53  
54  
55  
56  
57  
58  
59  
60



**Table 1. Characteristics of Organization for Economic Cooperation and Development 35 countries in 2015**

| Country            | GDP per capita<br>(US dollars) | Unemployment<br>rate<br>(%) | Poverty<br>rate<br>(%) | Children aged < 20<br>(% of population) |
|--------------------|--------------------------------|-----------------------------|------------------------|-----------------------------------------|
| Australia          | 45,584                         | 6.1                         | 18.6                   | 25.1                                    |
| Austria            | 42,906                         | 5.7                         | 20.9                   | 19.7                                    |
| Belgium            | 40,900                         | 8.5                         | 24.5                   | 22.6                                    |
| Canada             | 42,498                         | 6.9                         | 20.0                   | 22.0                                    |
| Chile              | 20,789                         | 6.2                         | 14.5                   | 28.0                                    |
| Czech Republic     | 29,874                         | 5.0                         | 17.3                   | 19.7                                    |
| Denmark            | 44,760                         | 6.2                         | 18.7                   | 23.1                                    |
| Estonia            | 26,023                         | 6.2                         | 20.0                   | 20.6                                    |
| Finland            | 38,272                         | 9.4                         | 23.5                   | 21.9                                    |
| France             | 36,902                         | 10.4                        | 26.2                   | 24.6                                    |
| Germany            | 42,503                         | 4.6                         | 20.0                   | 18.4                                    |
| Greece             | 23,649                         | 24.9                        | 28.9                   | 19.4                                    |
| Hungary            | 24,254                         | 6.8                         | 24.0                   | 19.7                                    |
| Iceland            | 43,726                         | 4.0                         | 11.5                   | 27.0                                    |
| Ireland            | 58,229                         | 9.9                         | 29.9                   | 27.7                                    |
| Israel             | 31,221                         | 5.2                         | 18.8                   | 36.4                                    |
| Italy              | 33,164                         | 11.9                        | 23.9                   | 18.4                                    |
| Japan              | 37,036                         | 3.4                         | 18.4                   | 17.3                                    |
| Latvia             | 22,237                         | 9.9                         | 19.9                   | 19.4                                    |
| Luxembourg         | 87,825                         | 6.7                         | 25.0                   | 22.6                                    |
| Mexico             | 16,660                         | 4.3                         | 16.6                   | 37.2                                    |
| Netherlands        | 45,855                         | 6.9                         | 20.1                   | 22.6                                    |
| New Zealand        | 33,981                         | 5.4                         | 15.2                   | 26.8                                    |
| Norway             | 59,430                         | 4.3                         | 18.1                   | 24.4                                    |
| Poland             | 24,170                         | 7.5                         | 21.2                   | 20.4                                    |
| Portugal           | 26,677                         | 12.4                        | 22.9                   | 19.6                                    |
| Slovakia           | 28,423                         | 11.5                        | 16.8                   | 20.7                                    |
| Slovenia           | 28,203                         | 9.0                         | 21.4                   | 19.4                                    |
| South Korea        | 34,193                         | 3.6                         | 13.5                   | 20.1                                    |
| Spain              | 31,753                         | 22.1                        | 28.8                   | 19.8                                    |
| Sweden             | 44,832                         | 7.4                         | 14.5                   | 22.8                                    |
| Switzerland        | 54,453                         | 4.8                         | 8.8                    | 20.3                                    |
| Turkey             | 22,709                         | 10.2                        | 15.3                   | 32.7                                    |
| United Kingdom     | 38,723                         | 5.3                         | 20.8                   | 23.7                                    |
| United States (US) | 52,105                         | 5.3                         | 19.8                   | 25.7                                    |
| OECD 35 average    | 37,558                         | 7.9                         | 20.0                   | 23.1                                    |

GDP: gross domestic product. The GDP per capita was measured as purchasing power parity adjusted US dollars (fixed price, 2010 as the baseline year). Poverty rate show the ratio of the number of people aged 18–65 whose income falls below half the median household income of the total population, before tax and transfer.



1  
2  
3 **Figure 1. Social spending on children and prevalence of childhood obesity by sex in the**  
4 **Organization for Economic Cooperation and Development (OECD) countries**  
5  
6  
7

8 **Source:** Authors' analysis of data from OECD's Social Expenditure Database (SOCX), OECD  
9 Education statistics database, and NCD Risk Factor Collaboration (NCD-RisC) database.

10 **Notes:** Data are from 2015 for all countries apart from Denmark (2014), Poland (2014),  
11 Netherlands (2011), or New Zealand (2011). The x-axis shows the country-level social spending  
12 on children (including cash benefits and tax breaks for families with children, expenditure on  
13 childcare or other benefits in kind, and expenditure on primary and secondary education),  
14 measured as purchasing power parity (PPP)-adjusted US dollars (fixed price, 2010 as the  
15 baseline year) per child aged under 20 years. The y-axis indicates the country-level prevalence  
16 (%) of children aged 5–19 years categorized as obesity (body mass index > 2 standard deviations  
17 above the WHO growth reference for children). The lines of best fit show that countries whose  
18 governments spend more money on children tend to experience smaller percentages of childhood  
19 obesity for both sexes (Pearson's  $r = -0.32$ ;  $p = 0.06$  for girls and  $r = -0.35$ ;  $p = 0.04$  for boys).  
20  
21  
22  
23  
24  
25  
26  
27  
28  
29  
30  
31  
32  
33  
34  
35  
36  
37  
38  
39  
40  
41  
42  
43  
44  
45  
46  
47  
48  
49  
50  
51  
52  
53  
54  
55  
56  
57  
58  
59  
60

**Table 2. Association between total or five dimensions of social spending on children (US dollars) and the prevalence of childhood obesity (%): Cross sectional analyses in 2015**

| Types of social spending                  | Coefficients          | 95% CI                |                       | P value | R squared |
|-------------------------------------------|-----------------------|-----------------------|-----------------------|---------|-----------|
|                                           |                       | Lower                 | Upper                 |         |           |
| <b>Girls</b>                              |                       |                       |                       |         |           |
| <b>Total social spending <sup>a</sup></b> | $-0.3 \times 10^{-3}$ | $-0.5 \times 10^{-3}$ | $-0.1 \times 10^{-3}$ | 0.01    | 0.92      |
| <b>By dimension <sup>b</sup></b>          |                       |                       |                       |         | 0.89      |
| <b>Family allowance</b>                   | $-0.2 \times 10^{-3}$ | $-0.9 \times 10^{-3}$ | $0.4 \times 10^{-3}$  | 0.43    |           |
| <b>Maternal and parental leave</b>        | $0.7 \times 10^{-3}$  | $-0.6 \times 10^{-3}$ | $1.9 \times 10^{-3}$  | 0.28    |           |
| <b>ECEC</b>                               | $-0.5 \times 10^{-3}$ | $-1.5 \times 10^{-3}$ | $0.5 \times 10^{-3}$  | 0.32    |           |
| <b>Education</b>                          | $-0.5 \times 10^{-3}$ | $-1.1 \times 10^{-3}$ | $0.04 \times 10^{-3}$ | 0.07    |           |
| <b>Others</b>                             | $0.1 \times 10^{-3}$  | $-0.7 \times 10^{-3}$ | $0.9 \times 10^{-3}$  | 0.79    |           |
| <b>Boys</b>                               |                       |                       |                       |         |           |
| <b>Total social spending <sup>a</sup></b> | $-0.4 \times 10^{-3}$ | $-0.7 \times 10^{-3}$ | $-0.1 \times 10^{-3}$ | 0.02    | 0.83      |
| <b>By dimension <sup>b</sup></b>          |                       |                       |                       |         | 0.79      |
| <b>Family allowance</b>                   | $-0.1 \times 10^{-3}$ | $-1.0 \times 10^{-3}$ | $0.8 \times 10^{-3}$  | 0.79    |           |
| <b>Maternal and parental leave</b>        | $1.3 \times 10^{-3}$  | $-0.5 \times 10^{-3}$ | $3.1 \times 10^{-3}$  | 0.14    |           |
| <b>ECEC</b>                               | $-0.7 \times 10^{-3}$ | $-2.1 \times 10^{-3}$ | $0.8 \times 10^{-3}$  | 0.37    |           |
| <b>Education</b>                          | $-0.7 \times 10^{-3}$ | $-1.5 \times 10^{-3}$ | $0.1 \times 10^{-3}$  | 0.07    |           |
| <b>Others</b>                             | $0.1 \times 10^{-3}$  | $-1.0 \times 10^{-3}$ | $1.1 \times 10^{-3}$  | 0.87    |           |

CI: Confidence interval. ECEC: Early childhood education and care.

For each sex, we examined the association between social spending on children (PPP-adjusted US dollars) and prevalence of childhood obesity (%) by using a multivariable linear regression model that adjusted for the countries' demographics (employment rate, poverty rate, and percentage of children aged < 20 years) in 2015 and the prevalence of childhood obesity in 2000. We reported the coefficient. For example, our results indicated that among girls, a 1000 US dollar difference in total social spending per children was associated with a 0.3 percentage points lower prevalence of childhood obesity.

<sup>a</sup> We regressed the prevalence of childhood obesity on total social spending on children. These analyses were conducted for all the 35 countries.

<sup>b</sup> We regressed the prevalence of childhood obesity on five dimensions of social spending on children. These analyses were conducted for 33 countries. Mexico and United States of America were excluded because either dimension of social spending is not available.

1  
2  
3 **Figure 2. Changes in social spending on children and in the prevalence of childhood obesity**  
4 **from 2000 to 2015 in the Organization for Economic Cooperation and Development**  
5 **(OECD) countries**  
6  
7  
8

9 **Source:** Authors' analysis of data from OECD's Social Expenditure Database (SOCX), OECD  
10 Education statistics database, and NCD Risk Factor Collaboration (NCD-RisC) database.

11 **Notes:** The x-axis shows the average annual change in social spending on children (PPP-adjusted  
12 US dollars per child) adjusted by the growth in GDP per capita during 2000–2015. The y-axis  
13 indicates the absolute change in the prevalence of childhood obesity from 2000 to 2015. The  
14 lines of best fit show that changes in social spending on children and the percentage of childhood  
15 obesity are inversely associated for both sexes (Pearson's  $r = -0.49$ ;  $p < 0.01$  for girls and  $r =$   
16  $-0.28$ ;  $p = 0.10$  for boys).  
17  
18  
19  
20  
21  
22  
23  
24  
25  
26  
27  
28  
29  
30  
31  
32  
33  
34  
35  
36  
37  
38  
39  
40  
41  
42  
43  
44  
45  
46  
47  
48  
49  
50  
51  
52  
53  
54  
55  
56  
57  
58  
59  
60

**Table 3. Association between changes in total or five dimensions of social spending on children (US dollars) and the prevalence of childhood obesity (%): Longitudinal analyses from 2000 to 2015**

| Types of social spending                 | Coefficients          | 95% CI                |                        | P value | R squared |
|------------------------------------------|-----------------------|-----------------------|------------------------|---------|-----------|
|                                          |                       | Lower                 | Upper                  |         |           |
| <i>Girls</i>                             |                       |                       |                        |         |           |
| <b>Total social spending<sup>a</sup></b> | $-0.6 \times 10^{-2}$ | $-1.0 \times 10^{-2}$ | $-0.2 \times 10^{-2}$  | 0.007   | 0.65      |
| <b>By dimension<sup>b</sup></b>          |                       |                       |                        |         | 0.72      |
| <b>Family allowance</b>                  | $-0.8 \times 10^{-2}$ | $-2.0 \times 10^{-2}$ | $0.5 \times 10^{-2}$   | 0.20    |           |
| <b>Maternal and parental leave</b>       | $1.0 \times 10^{-2}$  | $-1.5 \times 10^{-2}$ | $3.5 \times 10^{-2}$   | 0.42    |           |
| <b>ECEC</b>                              | $-1.2 \times 10^{-2}$ | $-2.4 \times 10^{-2}$ | $0.03 \times 10^{-2}$  | 0.045   |           |
| <b>Education</b>                         | $-1.1 \times 10^{-2}$ | $-1.9 \times 10^{-2}$ | $0.3 \times 10^{-2}$   | 0.01    |           |
| <b>Others</b>                            | $0.4 \times 10^{-2}$  | $-0.5 \times 10^{-2}$ | $1.3 \times 10^{-2}$   | 0.35    |           |
| <i>Boys</i>                              |                       |                       |                        |         |           |
| <b>Total social spending<sup>a</sup></b> | $-0.7 \times 10^{-2}$ | $-1.3 \times 10^{-2}$ | $-0.03 \times 10^{-2}$ | 0.04    | 0.55      |
| <b>By dimension<sup>b</sup></b>          |                       |                       |                        |         | 0.57      |
| <b>Family allowance</b>                  | $-1.2 \times 10^{-2}$ | $-3.4 \times 10^{-2}$ | $0.9 \times 10^{-2}$   | 0.26    |           |
| <b>Maternal and parental leave</b>       | $0.1 \times 10^{-2}$  | $-3.9 \times 10^{-2}$ | $4.1 \times 10^{-2}$   | 0.96    |           |
| <b>ECEC</b>                              | $-2.1 \times 10^{-2}$ | $-4.1 \times 10^{-2}$ | $-0.01 \times 10^{-2}$ | 0.049   |           |
| <b>Education</b>                         | $-0.5 \times 10^{-2}$ | $-2.0 \times 10^{-2}$ | $0.9 \times 10^{-2}$   | 0.43    |           |
| <b>Others</b>                            | $0.2 \times 10^{-2}$  | $-1.3 \times 10^{-2}$ | $1.7 \times 10^{-2}$   | 0.79    |           |

CI: Confidence interval. ECEC: Early childhood education and care.

For each sex, we examined the association between the changes in social spending on children (PPP-adjusted US dollars) and the prevalence of childhood obesity (%) from 2000 to 2015, by using a multivariable linear regression model that adjusted for average annual changes in employment rate and poverty rate, changes in the percentage of children aged < 20 years, and the “baseline” prevalence of childhood obesity in 2000. We reported the coefficient. For example, our results indicated that among girls, a 100 US dollar average annual increase in total social spending per child was associated with a 0.6 percentage points decrease in the prevalence of childhood obesity between 2000 and 2015.

<sup>a</sup> We regressed the change in the prevalence of childhood obesity on the change in total social spending on children. The analyses were conducted for 33 countries. South Korea and Luxembourg were excluded because the average annual change in unemployment rate or poverty rate cannot be calculated (data for more than two years are not available).

<sup>b</sup> We regressed the change in the prevalence of childhood obesity on the changes in five dimensions of social spending on children. The analyses were conducted for 31 countries. South Korea, Luxembourg, Mexico, and United States of America were excluded because the average annual change in either dimension of social spending or the average annual change in unemployment rate or poverty rate cannot be calculated (data for more than two years are not available).

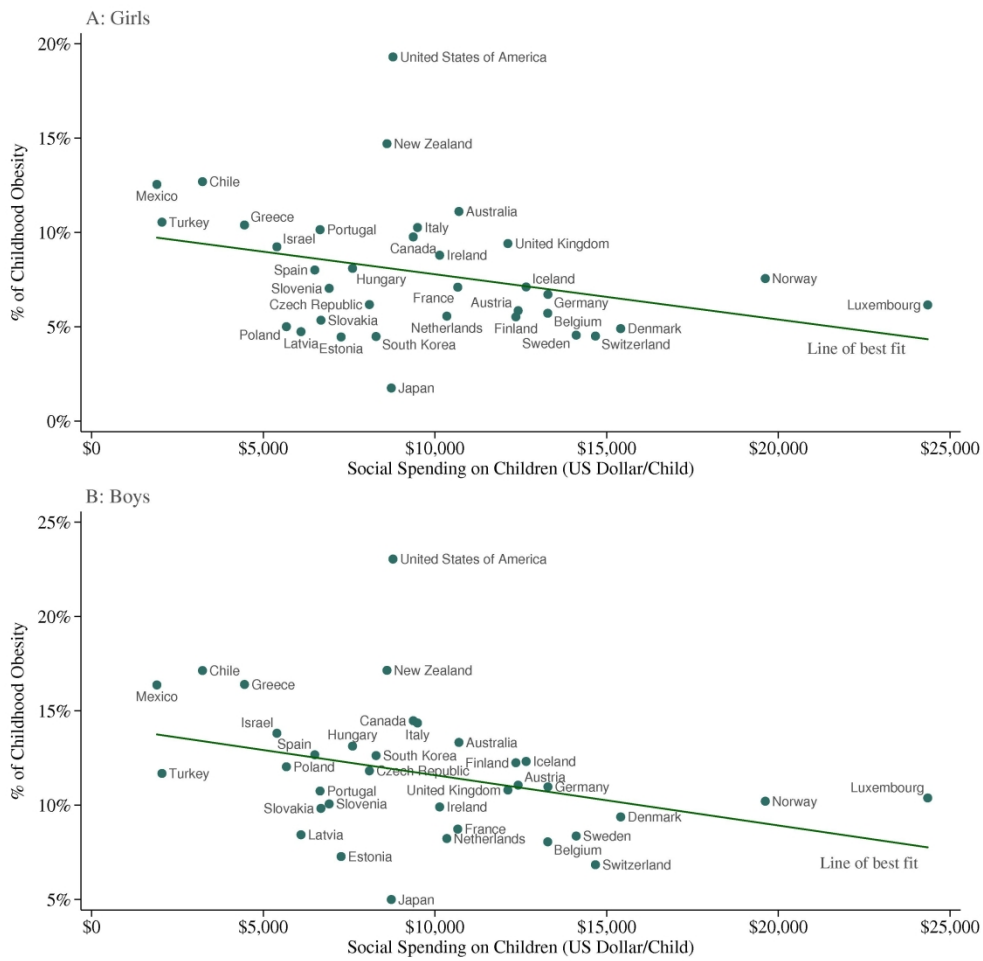

Figure 1. Social spending on children and prevalence of childhood obesity by sex in the Organization for Economic Cooperation and Development (OECD) countries

Source: Authors' analysis of data from OECD's Social Expenditure Database (SOCX), OECD Education statistics database, and NCD Risk Factor Collaboration (NCD-RisC) database.

Notes: Data are from 2015 for all countries apart from Denmark (2014), Poland (2014), Netherlands (2011), or New Zealand (2011). The x-axis shows the country-level social spending on children (including cash benefits and tax breaks for families with children, expenditure on childcare or other benefits in kind, and expenditure on primary and secondary education), measured as purchasing power parity (PPP)-adjusted US dollars (fixed price, 2010 as the baseline year) per child aged under 20 years. The y-axis indicates the country-level prevalence (%) of children aged 5–19 years categorized as obesity (body mass index > 2 standard deviations above the WHO growth reference for children). The lines of best fit show that countries whose governments spend more money on children tend to experience smaller percentages of childhood obesity for both sexes (Pearson's  $r = -0.32$ ;  $p = 0.06$  for girls and  $r = -0.35$ ;  $p = 0.04$  for boys).

139x139mm (600 x 600 DPI)



Figure 2. Changes in social spending on children and in the prevalence of childhood obesity from 2000 to 2015 in the Organization for Economic Cooperation and Development (OECD) countries

Source: Authors' analysis of data from OECD's Social Expenditure Database (SOCX), OECD Education statistics database, and NCD Risk Factor Collaboration (NCD-RisC) database.

Notes: The x-axis shows the average annual change in social spending on children (PPP-adjusted US dollars per child) adjusted by the growth in GDP per capita during 2000–2015. The y-axis indicates the absolute change in the prevalence of childhood obesity from 2000 to 2015. The lines of best fit show that changes in social spending on children and the percentage of childhood obesity are inversely associated for both sexes (Pearson's  $r = -0.49$ ;  $p < 0.01$  for girls and  $r = -0.28$ ;  $p = 0.10$  for boys).

127x139mm (600 x 600 DPI)

1  
2  
3  
4  
5  
6  
7  
8  
9

## Supplementary Material

### Relationships between Social Spending and Childhood Obesity in OECD Countries: An Ecological Study

10 Atsushi Miyawaki, Charlotte E.L. Evans, Patricia J. Lucas, Yasuki Kobayashi

11  
12  
13  
14  
15  
16  
17  
18  
19  
20  
21  
22  
23  
24  
25  
26  
27  
28  
29  
30  
31  
32  
33  
34  
35  
36  
37  
38  
39  
40  
41  
42  
43  
44  
45  
46  
47  
48  
49  
50  
51  
52  
53  
54  
55  
56  
57  
58  
59  
60

Table S1. Details of each dimension in social spending on family

| Dimensions                                                                  | Details                                                                                                                          |
|-----------------------------------------------------------------------------|----------------------------------------------------------------------------------------------------------------------------------|
| <b>Family allowances<br/>(Cash benefits / Tax<br/>break)</b>                | Family allowance                                                                                                                 |
|                                                                             | Family income supplement                                                                                                         |
|                                                                             | Family allowance supplement                                                                                                      |
|                                                                             | Basic family payment                                                                                                             |
|                                                                             | Additional family payment                                                                                                        |
|                                                                             | Home child care allowance                                                                                                        |
|                                                                             | Family tax payment                                                                                                               |
|                                                                             | Family tax benefit (Part A and B)                                                                                                |
|                                                                             | More help for families—one-off payments                                                                                          |
|                                                                             | Parenting payment (Single and Partnered)                                                                                         |
|                                                                             | Single Income Family Bonus (2008)                                                                                                |
|                                                                             | Back to School Bonus (2008)                                                                                                      |
|                                                                             | Economic Security Strategy (2008)                                                                                                |
|                                                                             | Single Income Family Supplement                                                                                                  |
| Schoolkids Bonus                                                            |                                                                                                                                  |
| <b>Maternity and parental<br/>leave<br/>(Cash benefits / Tax<br/>break)</b> | Maternity allowances                                                                                                             |
|                                                                             | Maternity immunization allowance                                                                                                 |
|                                                                             | Baby Bonus (previously Maternity payment)                                                                                        |
|                                                                             | Parental Leave Pay                                                                                                               |
|                                                                             | Dad and Partner Pay                                                                                                              |
|                                                                             | Stillborn Baby Payment                                                                                                           |
| <b>Early childhood education<br/>and care (ECEC)<br/>(Benefits in kind)</b> | National Partnerships on Early Childhood Education and Care - National Occasional Care                                           |
|                                                                             | Support for the Child Care System - Child Care Communications Campaign                                                           |
|                                                                             | Child care support                                                                                                               |
|                                                                             | Child care for eligible parents undergoing training                                                                              |
|                                                                             | Support for child care                                                                                                           |
|                                                                             | Support for child care: specific purpose payment                                                                                 |
|                                                                             | Child care benefit                                                                                                               |
|                                                                             | Child care (pre-primary education)                                                                                               |
|                                                                             | Child care (pre-primary education - 4-5yo)                                                                                       |
|                                                                             | Child Care Tax Rebate                                                                                                            |
|                                                                             | Support for the Child Care System - Child Care Services Support                                                                  |
|                                                                             | Support for the Child Care System - Job Education and Training                                                                   |
|                                                                             | Child Care Fee Assistance - Child Care Benefit                                                                                   |
|                                                                             | Child Care Fee Assistance - Child Care Rebate                                                                                    |
|                                                                             | National Partnerships on Early Childhood Education and Care - Indigenous Early Childhood Development Children and Family Centers |
|                                                                             | National Partnerships on Early Childhood Education and Care - TAFE Fee Waivers for Child Care Qualifications                     |
|                                                                             | National Partnerships on Early Childhood Education and Care - National Quality Agenda                                            |
|                                                                             | State/Territory Child Care Expenditure                                                                                           |
|                                                                             | National Partnership on Universal Access to Early Childhood Education                                                            |
|                                                                             | Early Childhood Education - 4 and 5 year olds in ISCED 1 (Primary school)                                                        |



|                                                   |                                                                      |
|---------------------------------------------------|----------------------------------------------------------------------|
|                                                   |                                                                      |
| <b>Others<br/>(Cash benefits / Tax<br/>break)</b> | Supporting parent's benefit                                          |
|                                                   | Sole parents pension                                                 |
|                                                   | Partner allowance (pension)                                          |
|                                                   | Parenting allowance                                                  |
|                                                   | Assistance for Isolated Children                                     |
| <b>Others<br/>(Benefits in kind)</b>              | Home help / Accommodation                                            |
|                                                   | Parenting                                                            |
|                                                   | Family support services scheme                                       |
|                                                   | Child abuse prevention                                               |
|                                                   | Family violence partnership                                          |
|                                                   | Family violence regional activities                                  |
|                                                   | Grants to family relationship support organizations                  |
|                                                   | Indigenous parenting and family well-being                           |
|                                                   | National illicit drug strategy                                       |
|                                                   | Services for families with children                                  |
|                                                   | Stronger families and communities strategy: families initiative      |
|                                                   | Services for families with children: specific purpose payment        |
|                                                   | Pre-school education                                                 |
|                                                   | Family and child welfare - State and Territory                       |
|                                                   | Child protection and out-of-home care services - State and Territory |
| Family Support                                    |                                                                      |
| Find and Connect                                  |                                                                      |
| Families and Children                             |                                                                      |

Source: OECD's Social Expenditure Database (SOCX).

**Method S1. Technical appendix**

I regressed the average annual growth in social spending on the average annual growth in GDP per capita and calculated the residuals. Then, I calibrated them by adding the average of annual growth in social spending so that “cross-national mean of adjusted average annual growth in social spending” = “cross-national mean of unadjusted average annual growth in social spending.”

For peer review only

**Figure S1. Specific dimensions of social spending on children in OECD countries compared with the OECD averages in 2015**



**Source:** Authors' analysis of data from Organization for Economic Cooperation and Development (OECD) Social Expenditure Database (SOCX).

**Notes:** Specific dimensions of social spending on children are shown for 29 OECD countries for which the information on all the dimensions of social spending on children are available (Denmark, Mexico, Netherlands, New Zealand, Poland, and the United States are excluded). The OECD mean is calculated for these 29 countries. ECEC: Early childhood education and care.

**Table S2. Association between total or five dimensions of social spending on children (US dollars) and the prevalence of childhood obesity (%) for countries with lower vs. higher gross domestic product (GDP) per capita: Cross sectional analyses in 2015**

| Types of social spending           | Lower GDP per capita  |                       |                       |         | Higher GDP per capita  |                       |                        |         | P-for-interaction <sup>a</sup> |
|------------------------------------|-----------------------|-----------------------|-----------------------|---------|------------------------|-----------------------|------------------------|---------|--------------------------------|
|                                    | Coefficients          | 95% CI                |                       | P value | Coefficients           | 95% CI                |                        | P value |                                |
|                                    |                       | Lower                 | Upper                 |         |                        | Lower                 | Upper                  |         |                                |
| <b>Girls</b>                       |                       |                       |                       |         |                        |                       |                        |         |                                |
| Total social spending <sup>b</sup> | $0.05 \times 10^{-3}$ | $-1.1 \times 10^{-3}$ | $1.2 \times 10^{-3}$  | 0.93    | $-0.2 \times 10^{-3}$  | $-0.4 \times 10^{-3}$ | $-0.02 \times 10^{-3}$ | 0.03    | 0.12                           |
| By dimension <sup>c</sup>          |                       |                       |                       |         |                        |                       |                        |         |                                |
| Family allowance                   | $2.4 \times 10^{-3}$  | $-1.6 \times 10^{-3}$ | $6.3 \times 10^{-3}$  | 0.19    | $-0.4 \times 10^{-3}$  | $-2.5 \times 10^{-3}$ | $1.8 \times 10^{-3}$   | 0.68    | 0.21                           |
| Maternal and parental leave        | $-2.6 \times 10^{-3}$ | $-6.8 \times 10^{-3}$ | $1.5 \times 10^{-3}$  | 0.17    | $0.5 \times 10^{-3}$   | $-7.3 \times 10^{-3}$ | $8.4 \times 10^{-3}$   | 0.87    | 0.33                           |
| ECEC                               | $-2.0 \times 10^{-3}$ | $-5.9 \times 10^{-3}$ | $2.0 \times 10^{-3}$  | 0.27    | $-0.7 \times 10^{-3}$  | $-4.8 \times 10^{-3}$ | $3.5 \times 10^{-3}$   | 0.70    | 0.49                           |
| Education                          | $-0.5 \times 10^{-3}$ | $-3.7 \times 10^{-3}$ | $2.8 \times 10^{-3}$  | 0.74    | $-0.3 \times 10^{-3}$  | $-1.1 \times 10^{-3}$ | $0.6 \times 10^{-3}$   | 0.49    | 0.61                           |
| Others                             | $-0.5 \times 10^{-3}$ | $-3.1 \times 10^{-3}$ | $2.1 \times 10^{-3}$  | 0.67    | $-0.01 \times 10^{-3}$ | $-1.9 \times 10^{-3}$ | $1.9 \times 10^{-3}$   | 0.99    | 0.78                           |
| <b>Boys</b>                        |                       |                       |                       |         |                        |                       |                        |         |                                |
| Total social spending <sup>b</sup> | $-0.1 \times 10^{-3}$ | $-1.5 \times 10^{-3}$ | $1.4 \times 10^{-3}$  | 0.92    | $-0.2 \times 10^{-3}$  | $-0.5 \times 10^{-3}$ | $-0.1 \times 10^{-3}$  | 0.04    | 0.07                           |
| By dimension <sup>c</sup>          |                       |                       |                       |         |                        |                       |                        |         |                                |
| Family allowance                   | $3.1 \times 10^{-3}$  | $-0.2 \times 10^{-3}$ | $6.3 \times 10^{-3}$  | 0.06    | $-0.4 \times 10^{-3}$  | $-2.0 \times 10^{-3}$ | $1.3 \times 10^{-3}$   | 0.58    | 0.33                           |
| Maternal and parental leave        | $-4.8 \times 10^{-3}$ | $-8.6 \times 10^{-3}$ | $-1.0 \times 10^{-3}$ | 0.02    | $1.3 \times 10^{-3}$   | $-5.4 \times 10^{-3}$ | $8.0 \times 10^{-3}$   | 0.64    | 0.41                           |
| ECEC                               | $-2.3 \times 10^{-3}$ | $-5.7 \times 10^{-3}$ | $1.3 \times 10^{-3}$  | 0.17    | $-1.3 \times 10^{-3}$  | $-4.2 \times 10^{-3}$ | $1.7 \times 10^{-3}$   | 0.32    | 0.64                           |
| Education                          | $-2.2 \times 10^{-3}$ | $-4.8 \times 10^{-3}$ | $0.4 \times 10^{-3}$  | 0.09    | $-0.3 \times 10^{-3}$  | $-1.2 \times 10^{-3}$ | $0.7 \times 10^{-3}$   | 0.54    | 0.35                           |
| Others                             | $-1.3 \times 10^{-3}$ | $-3.5 \times 10^{-3}$ | $1.0 \times 10^{-3}$  | 0.22    | $0.1 \times 10^{-3}$   | $-1.5 \times 10^{-3}$ | $1.6 \times 10^{-3}$   | 0.92    | 0.99                           |

We divided OECD countries in half according to GDP per capita in 2000 and repeated the regression analyses for each group. See Table 2 in the main text of the manuscript for more details.

<sup>a</sup> We formally tested the interaction between the level of GDP per capita in 2000 (lower vs. upper) and social spending on children using a Wald test.

<sup>b</sup> We regressed the prevalence of childhood obesity on total social spending on children. These analyses were conducted for 18 countries with lower GDP per capita in 2000 and 17 countries with higher GDP per capita in 2000.

<sup>c</sup> We regressed the prevalence of childhood obesity on five dimensions of social spending on children. These analyses were conducted for 17 countries with lower GDP per capita in 2000 and 16 countries with higher GDP per capita in 2000. Mexico and United States of America were excluded because either dimension of social spending is not available.

**Table S3. Association between changes in total or five dimensions of social spending on children (US dollars) and the prevalence of childhood obesity (%) for countries with lower vs. higher gross domestic product (GDP) per capita: Longitudinal analyses from 2000 to 2015**

| Types of social spending           | Lower GDP per capita  |                        |                       |         | Higher GDP per capita |                       |                       | P-for-interaction <sup>a</sup> |         |
|------------------------------------|-----------------------|------------------------|-----------------------|---------|-----------------------|-----------------------|-----------------------|--------------------------------|---------|
|                                    | Coefficients          | 95% CI                 |                       | P value | Coefficients          | 95% CI                |                       |                                | P value |
|                                    |                       | Lower                  | Upper                 |         |                       | Lower                 | Upper                 |                                |         |
| <i>Girls</i>                       |                       |                        |                       |         |                       |                       |                       |                                |         |
| Total social spending <sup>b</sup> | $-0.3 \times 10^{-2}$ | $-0.9 \times 10^{-2}$  | $0.3 \times 10^{-2}$  | 0.30    | $-0.4 \times 10^{-2}$ | $-1.1 \times 10^{-2}$ | $0.3 \times 10^{-2}$  | 0.26                           | 0.46    |
| By dimension <sup>c</sup>          |                       |                        |                       |         |                       |                       |                       |                                |         |
| Family allowance                   | $-5.8 \times 10^{-2}$ | $-13.4 \times 10^{-2}$ | $1.7 \times 10^{-2}$  | 0.11    | $-0.7 \times 10^{-2}$ | $-3.1 \times 10^{-2}$ | $1.6 \times 10^{-2}$  | 0.46                           | 0.38    |
| Maternal and parental leave        | $1.7 \times 10^{-2}$  | $-3.1 \times 10^{-2}$  | $6.4 \times 10^{-2}$  | 0.42    | $-0.5 \times 10^{-2}$ | $-3.4 \times 10^{-2}$ | $2.4 \times 10^{-2}$  | 0.67                           | 0.58    |
| ECEC                               | $1.2 \times 10^{-2}$  | $-4.9 \times 10^{-2}$  | $7.3 \times 10^{-2}$  | 0.65    | $1.6 \times 10^{-2}$  | $-4.2 \times 10^{-2}$ | $7.3 \times 10^{-2}$  | 0.52                           | 0.11    |
| Education                          | $0.6 \times 10^{-2}$  | $-1.1 \times 10^{-2}$  | $2.4 \times 10^{-2}$  | 0.41    | $1.4 \times 10^{-2}$  | $-2.5 \times 10^{-2}$ | $5.3 \times 10^{-2}$  | 0.39                           | 0.90    |
| Others                             | $-1.0 \times 10^{-2}$ | $-3.5 \times 10^{-2}$  | $1.4 \times 10^{-2}$  | 0.33    | $-1.3 \times 10^{-2}$ | $-4.0 \times 10^{-2}$ | $1.5 \times 10^{-2}$  | 0.29                           | 0.91    |
| <i>Boys</i>                        |                       |                        |                       |         |                       |                       |                       |                                |         |
| Total social spending <sup>b</sup> | $-0.3 \times 10^{-2}$ | $-1.3 \times 10^{-2}$  | $0.7 \times 10^{-2}$  | 0.52    | $-0.2 \times 10^{-2}$ | $-1.3 \times 10^{-2}$ | $0.8 \times 10^{-2}$  | 0.64                           | 0.36    |
| By dimension <sup>c</sup>          |                       |                        |                       |         |                       |                       |                       |                                |         |
| Family allowance                   | $-5.5 \times 10^{-2}$ | $-19.7 \times 10^{-2}$ | $8.6 \times 10^{-2}$  | 0.38    | $-0.8 \times 10^{-2}$ | $-4.5 \times 10^{-2}$ | $3.0 \times 10^{-2}$  | 0.62                           | 0.61    |
| Maternal and parental leave        | $1.4 \times 10^{-2}$  | $-7.7 \times 10^{-2}$  | $10.4 \times 10^{-2}$ | 0.73    | $0.1 \times 10^{-2}$  | $-5.1 \times 10^{-2}$ | $5.2 \times 10^{-2}$  | 0.97                           | 0.41    |
| ECEC                               | $0.7 \times 10^{-2}$  | $-9.2 \times 10^{-2}$  | $10.7 \times 10^{-2}$ | 0.86    | $1.1 \times 10^{-2}$  | $-8.8 \times 10^{-2}$ | $11.0 \times 10^{-2}$ | 0.78                           | 0.29    |
| Education                          | $0.1 \times 10^{-2}$  | $-3.1 \times 10^{-2}$  | $3.3 \times 10^{-2}$  | 0.92    | $1.0 \times 10^{-2}$  | $-5.1 \times 10^{-2}$ | $7.1 \times 10^{-2}$  | 0.68                           | 0.91    |
| Others                             | $-0.2 \times 10^{-2}$ | $-4.7 \times 10^{-2}$  | $4.4 \times 10^{-2}$  | 0.93    | $-0.7 \times 10^{-2}$ | $-5.7 \times 10^{-2}$ | $4.3 \times 10^{-2}$  | 0.74                           | 0.44    |

We divided OECD countries in half according to GDP per capita in 2000 and repeated the regression analyses for each group. See Table 3 in the main text of the manuscript for more details.

<sup>a</sup> We formally tested the interaction between the level of GDP per capita in 2000 (lower vs. upper) and changes in social spending on children using a Wald test.

<sup>b</sup> We regressed the change in the prevalence of childhood obesity on the change in total social spending on children. The analyses were conducted for 17 countries with lower GDP per capita in 2000 and 16 countries with higher GDP per capita in 2000.

<sup>c</sup> We regressed the change in the prevalence of childhood obesity on the changes in five dimensions of social spending on children. The analyses were conducted for 16 countries with lower GDP per capita in 2000 and 15 countries with higher GDP per capita in 2000.

# Reporting checklist for cross sectional study.

Based on the STROBE cross sectional guidelines.

## Instructions to authors

Complete this checklist by entering the page numbers from your manuscript where readers will find each of the items listed below.

Your article may not currently address all the items on the checklist. Please modify your text to include the missing information. If you are certain that an item does not apply, please write "n/a" and provide a short explanation.

Upload your completed checklist as an extra file when you submit to a journal.

In your methods section, say that you used the STROBE cross sectional reporting guidelines, and cite them as:

von Elm E, Altman DG, Egger M, Pocock SJ, Gotsche PC, Vandenbroucke JP. The Strengthening the Reporting of Observational Studies in Epidemiology (STROBE) Statement: guidelines for reporting observational studies.

|                           |                     | Reporting Item                                                                                  | Page Number |
|---------------------------|---------------------|-------------------------------------------------------------------------------------------------|-------------|
| <b>Title and abstract</b> |                     |                                                                                                 |             |
| Title                     | <a href="#">#1a</a> | Indicate the study's design with a commonly used term in the title or the abstract              | 1           |
| Abstract                  | <a href="#">#1b</a> | Provide in the abstract an informative and balanced summary of what was done and what was found | 3           |
| <b>Introduction</b>       |                     |                                                                                                 |             |
| Background / rationale    | <a href="#">#2</a>  | Explain the scientific background and rationale for the investigation being reported            | 6-7         |
| Objectives                | <a href="#">#3</a>  | State specific objectives, including any prespecified hypotheses                                | 7-8         |
| <b>Methods</b>            |                     |                                                                                                 |             |
| Study design              | <a href="#">#4</a>  | Present key elements of study design early in the paper                                         | 8-9         |
| Setting                   | <a href="#">#5</a>  | Describe the setting, locations, and relevant dates, including periods of                       | 8-9         |

|    |                      |                                                                                                              |       |
|----|----------------------|--------------------------------------------------------------------------------------------------------------|-------|
|    |                      | recruitment, exposure, follow-up, and data collection                                                        |       |
| 1  |                      |                                                                                                              |       |
| 2  |                      |                                                                                                              |       |
| 3  | Eligibility criteria | <a href="#">#6a</a> Give the eligibility criteria, and the sources and methods of selection of participants. | 8-9   |
| 4  |                      |                                                                                                              |       |
| 5  |                      |                                                                                                              |       |
| 6  |                      | <a href="#">#7</a> Clearly define all outcomes, exposures, predictors, potential                             | 9-10  |
| 7  |                      | confounders, and effect modifiers. Give diagnostic criteria, if applicable                                   |       |
| 8  |                      |                                                                                                              |       |
| 9  |                      |                                                                                                              |       |
| 10 | Data sources /       | <a href="#">#8</a> For each variable of interest give sources of data and details of methods                 | 8-9   |
| 11 | measurement          | of assessment (measurement). Describe comparability of assessment                                            |       |
| 12 |                      | methods if there is more than one group. Give information separately                                         |       |
| 13 |                      | for for exposed and unexposed groups if applicable.                                                          |       |
| 14 |                      |                                                                                                              |       |
| 15 |                      |                                                                                                              |       |
| 16 |                      |                                                                                                              |       |
| 17 | Bias                 | <a href="#">#9</a> Describe any efforts to address potential sources of bias                                 | 10-11 |
| 18 |                      |                                                                                                              |       |
| 19 | Study size           | <a href="#">#10</a> Explain how the study size was arrived at                                                | 8     |
| 20 |                      |                                                                                                              |       |
| 21 | Quantitative         | <a href="#">#11</a> Explain how quantitative variables were handled in the analyses. If                      | 11    |
| 22 | variables            | applicable, describe which groupings were chosen, and why                                                    |       |
| 23 |                      |                                                                                                              |       |
| 24 |                      |                                                                                                              |       |
| 25 | Statistical          | <a href="#">#12a</a> Describe all statistical methods, including those used to control for                   | 11    |
| 26 | methods              | confounding                                                                                                  |       |
| 27 |                      |                                                                                                              |       |
| 28 |                      |                                                                                                              |       |
| 29 | Statistical          | <a href="#">#12b</a> Describe any methods used to examine subgroups and interactions                         | N/A   |
| 30 | methods              |                                                                                                              |       |
| 31 |                      |                                                                                                              |       |
| 32 |                      |                                                                                                              |       |
| 33 | Statistical          | <a href="#">#12c</a> Explain how missing data were addressed                                                 | 11-12 |
| 34 | methods              |                                                                                                              |       |
| 35 |                      |                                                                                                              |       |
| 36 |                      |                                                                                                              |       |
| 37 | Statistical          | <a href="#">#12d</a> If applicable, describe analytical methods taking account of sampling                   | N/A   |
| 38 | methods              | strategy                                                                                                     |       |
| 39 |                      |                                                                                                              |       |
| 40 |                      |                                                                                                              |       |
| 41 | Statistical          | <a href="#">#12e</a> Describe any sensitivity analyses                                                       | 13    |
| 42 | methods              |                                                                                                              |       |
| 43 |                      |                                                                                                              |       |
| 44 | <b>Results</b>       |                                                                                                              |       |
| 45 |                      |                                                                                                              |       |
| 46 |                      |                                                                                                              |       |
| 47 | Participants         | <a href="#">#13a</a> Report numbers of individuals at each stage of study—eg numbers                         | 12    |
| 48 |                      | potentially eligible, examined for eligibility, confirmed eligible,                                          |       |
| 49 |                      | included in the study, completing follow-up, and analysed. Give                                              |       |
| 50 |                      | information separately for for exposed and unexposed groups if                                               |       |
| 51 |                      | applicable.                                                                                                  |       |
| 52 |                      |                                                                                                              |       |
| 53 |                      |                                                                                                              |       |
| 54 |                      |                                                                                                              |       |
| 55 | Participants         | <a href="#">#13b</a> Give reasons for non-participation at each stage                                        | 12    |
| 56 |                      |                                                                                                              |       |
| 57 | Participants         | <a href="#">#13c</a> Consider use of a flow diagram                                                          | N/A   |
| 58 |                      |                                                                                                              |       |
| 59 |                      |                                                                                                              |       |
| 60 |                      |                                                                                                              |       |

|    |                    |                      |                                                                                                                                                                                                                   |       |
|----|--------------------|----------------------|-------------------------------------------------------------------------------------------------------------------------------------------------------------------------------------------------------------------|-------|
| 1  | Descriptive data   | <a href="#">#14a</a> | Give characteristics of study participants (eg demographic, clinical, social) and information on exposures and potential confounders. Give information separately for exposed and unexposed groups if applicable. | 12    |
| 2  |                    |                      |                                                                                                                                                                                                                   |       |
| 3  |                    |                      |                                                                                                                                                                                                                   |       |
| 4  |                    |                      |                                                                                                                                                                                                                   |       |
| 5  |                    |                      |                                                                                                                                                                                                                   |       |
| 6  | Descriptive data   | <a href="#">#14b</a> | Indicate number of participants with missing data for each variable of interest                                                                                                                                   | 13    |
| 7  |                    |                      |                                                                                                                                                                                                                   |       |
| 8  |                    |                      |                                                                                                                                                                                                                   |       |
| 9  |                    |                      |                                                                                                                                                                                                                   |       |
| 10 | Outcome data       | <a href="#">#15</a>  | Report numbers of outcome events or summary measures. Give information separately for exposed and unexposed groups if applicable.                                                                                 | 13-14 |
| 11 |                    |                      |                                                                                                                                                                                                                   |       |
| 12 |                    |                      |                                                                                                                                                                                                                   |       |
| 13 |                    |                      |                                                                                                                                                                                                                   |       |
| 14 | Main results       | <a href="#">#16a</a> | Give unadjusted estimates and, if applicable, confounder-adjusted estimates and their precision (eg, 95% confidence interval). Make clear which confounders were adjusted for and why they were included          | 13-15 |
| 15 |                    |                      |                                                                                                                                                                                                                   |       |
| 16 |                    |                      |                                                                                                                                                                                                                   |       |
| 17 |                    |                      |                                                                                                                                                                                                                   |       |
| 18 |                    |                      |                                                                                                                                                                                                                   |       |
| 19 | Main results       | <a href="#">#16b</a> | Report category boundaries when continuous variables were categorized                                                                                                                                             | N/A   |
| 20 |                    |                      |                                                                                                                                                                                                                   |       |
| 21 | Main results       | <a href="#">#16c</a> | If relevant, consider translating estimates of relative risk into absolute risk for a meaningful time period                                                                                                      | N/A   |
| 22 |                    |                      |                                                                                                                                                                                                                   |       |
| 23 |                    |                      |                                                                                                                                                                                                                   |       |
| 24 |                    |                      |                                                                                                                                                                                                                   |       |
| 25 | Other analyses     | <a href="#">#17</a>  | Report other analyses done—e.g., analyses of subgroups and interactions, and sensitivity analyses                                                                                                                 | 15-16 |
| 26 |                    |                      |                                                                                                                                                                                                                   |       |
| 27 |                    |                      |                                                                                                                                                                                                                   |       |
| 28 |                    |                      |                                                                                                                                                                                                                   |       |
| 29 | <b>Discussion</b>  |                      |                                                                                                                                                                                                                   |       |
| 30 |                    |                      |                                                                                                                                                                                                                   |       |
| 31 | Key results        | <a href="#">#18</a>  | Summarise key results with reference to study objectives                                                                                                                                                          | 16    |
| 32 |                    |                      |                                                                                                                                                                                                                   |       |
| 33 |                    |                      |                                                                                                                                                                                                                   |       |
| 34 | Limitations        | <a href="#">#19</a>  | Discuss limitations of the study, taking into account sources of potential bias or imprecision. Discuss both direction and magnitude of any potential bias.                                                       | 19-20 |
| 35 |                    |                      |                                                                                                                                                                                                                   |       |
| 36 |                    |                      |                                                                                                                                                                                                                   |       |
| 37 |                    |                      |                                                                                                                                                                                                                   |       |
| 38 |                    |                      |                                                                                                                                                                                                                   |       |
| 39 | Interpretation     | <a href="#">#20</a>  | Give a cautious overall interpretation considering objectives, limitations, multiplicity of analyses, results from similar studies, and other relevant evidence.                                                  | 16-18 |
| 40 |                    |                      |                                                                                                                                                                                                                   |       |
| 41 |                    |                      |                                                                                                                                                                                                                   |       |
| 42 |                    |                      |                                                                                                                                                                                                                   |       |
| 43 |                    |                      |                                                                                                                                                                                                                   |       |
| 44 | Generalisability   | <a href="#">#21</a>  | Discuss the generalisability (external validity) of the study results                                                                                                                                             | 20    |
| 45 |                    |                      |                                                                                                                                                                                                                   |       |
| 46 |                    |                      |                                                                                                                                                                                                                   |       |
| 47 | <b>Other</b>       |                      |                                                                                                                                                                                                                   |       |
| 48 | <b>Information</b> |                      |                                                                                                                                                                                                                   |       |
| 49 |                    |                      |                                                                                                                                                                                                                   |       |
| 50 |                    |                      |                                                                                                                                                                                                                   |       |
| 51 | Funding            | <a href="#">#22</a>  | Give the source of funding and the role of the funders for the present study and, if applicable, for the original study on which the present article is based                                                     | 21    |
| 52 |                    |                      |                                                                                                                                                                                                                   |       |
| 53 |                    |                      |                                                                                                                                                                                                                   |       |
| 54 |                    |                      |                                                                                                                                                                                                                   |       |
| 55 |                    |                      |                                                                                                                                                                                                                   |       |

The STROBE checklist is distributed under the terms of the Creative Commons Attribution License CC-BY.

This checklist was completed on 26. August 2020 using <https://www.goodreports.org/>, a tool made by the

[EQUATOR Network](#) in collaboration with [Penelope.ai](#)

For peer review only - <http://bmjopen.bmj.com/site/about/guidelines.xhtml>
