# Supplementary material for: Relationships between social spending and childhood obesity in OECD countries: an ecological study
Source: PubMed Central journal article supplement — BMJ Open. 2021 Feb 23;11(2):e044205. doi: 10.1136/bmjopen-2020-044205 (PMC7907862; doi:10.1136/bmjopen-2020-044205), 2021-02-23
Supplement: bmjopen-2020-044205supp001.pdf [file bmjopen-2020-044205supp001.pdf]

## **Supplementary Material**

### **Relationships between Social Spending and Childhood Obesity in OECD Countries: An Ecological Study**

Atsushi Miyawaki, Charlotte E.L. Evans, Patricia J. Lucas, Yasuki Kobayashi

**Table S1. Details of each dimension in social spending on family**

| <b>Dimensions</b>                                                           | <b>Details</b>                                                                                                                   |
|-----------------------------------------------------------------------------|----------------------------------------------------------------------------------------------------------------------------------|
| <b>Family allowances<br/>(Cash benefits / Tax<br/>break)</b>                | Family allowance                                                                                                                 |
|                                                                             | Family income supplement                                                                                                         |
|                                                                             | Family allowance supplement                                                                                                      |
|                                                                             | Basic family payment                                                                                                             |
|                                                                             | Additional family payment                                                                                                        |
|                                                                             | Home child care allowance                                                                                                        |
|                                                                             | Family tax payment                                                                                                               |
|                                                                             | Family tax benefit (Part A and B)                                                                                                |
|                                                                             | More help for families—one-off payments                                                                                          |
|                                                                             | Parenting payment (Single and Partnered)                                                                                         |
|                                                                             | Single Income Family Bonus (2008)                                                                                                |
|                                                                             | Back to School Bonus (2008)                                                                                                      |
|                                                                             | Economic Security Strategy (2008)                                                                                                |
|                                                                             | Single Income Family Supplement                                                                                                  |
| Schoolkids Bonus                                                            |                                                                                                                                  |
| <b>Maternity and parental<br/>leave<br/>(Cash benefits / Tax<br/>break)</b> | Maternity allowances                                                                                                             |
|                                                                             | Maternity immunization allowance                                                                                                 |
|                                                                             | Baby Bonus (previously Maternity payment)                                                                                        |
|                                                                             | Parental Leave Pay                                                                                                               |
|                                                                             | Dad and Partner Pay                                                                                                              |
|                                                                             | Stillborn Baby Payment                                                                                                           |
| <b>Early childhood education<br/>and care (ECEC)<br/>(Benefits in kind)</b> | National Partnerships on Early Childhood Education and Care - National Occasional Care                                           |
|                                                                             | Support for the Child Care System - Child Care Communications Campaign                                                           |
|                                                                             | Child care support                                                                                                               |
|                                                                             | Child care for eligible parents undergoing training                                                                              |
|                                                                             | Support for child care                                                                                                           |
|                                                                             | Support for child care: specific purpose payment                                                                                 |
|                                                                             | Child care benefit                                                                                                               |
|                                                                             | Child care (pre-primary education)                                                                                               |
|                                                                             | Child care (pre-primary education - 4-5yo)                                                                                       |
|                                                                             | Child Care Tax Rebate                                                                                                            |
|                                                                             | Support for the Child Care System - Child Care Services Support                                                                  |
|                                                                             | Support for the Child Care System - Job Education and Training                                                                   |
|                                                                             | Child Care Fee Assistance - Child Care Benefit                                                                                   |
|                                                                             | Child Care Fee Assistance - Child Care Rebate                                                                                    |
|                                                                             | National Partnerships on Early Childhood Education and Care - Indigenous Early Childhood Development Children and Family Centers |
|                                                                             | National Partnerships on Early Childhood Education and Care - TAFE Fee Waivers for Child Care Qualifications                     |
|                                                                             | National Partnerships on Early Childhood Education and Care - National Quality Agenda                                            |
|                                                                             | State/Territory Child Care Expenditure                                                                                           |
|                                                                             | National Partnership on Universal Access to Early Childhood Education                                                            |
|                                                                             | Early Childhood Education - 4 and 5 year olds in ISCED 1 (Primary school)                                                        |

|                                                   |                                                                      |
|---------------------------------------------------|----------------------------------------------------------------------|
|                                                   |                                                                      |
| <b>Others<br/>(Cash benefits / Tax<br/>break)</b> | Supporting parent's benefit                                          |
|                                                   | Sole parents pension                                                 |
|                                                   | Partner allowance (pension)                                          |
|                                                   | Parenting allowance                                                  |
|                                                   | Assistance for Isolated Children                                     |
| <b>Others<br/>(Benefits in kind)</b>              | Home help / Accommodation                                            |
|                                                   | Parenting                                                            |
|                                                   | Family support services scheme                                       |
|                                                   | Child abuse prevention                                               |
|                                                   | Family violence partnership                                          |
|                                                   | Family violence regional activities                                  |
|                                                   | Grants to family relationship support organizations                  |
|                                                   | Indigenous parenting and family well-being                           |
|                                                   | National illicit drug strategy                                       |
|                                                   | Services for families with children                                  |
|                                                   | Stronger families and communities strategy: families initiative      |
|                                                   | Services for families with children: specific purpose payment        |
|                                                   | Pre-school education                                                 |
|                                                   | Family and child welfare - State and Territory                       |
|                                                   | Child protection and out-of-home care services - State and Territory |
|                                                   | Family Support                                                       |
|                                                   | Find and Connect                                                     |
| Families and Children                             |                                                                      |

**Source:** OECD's Social Expenditure Database (SOCX).

**Method S1. Technical appendix**

I regressed the average annual growth in social spending on the average annual growth in GDP per capita and calculated the residuals. Then, I calibrated them by adding the average of annual growth in social spending so that “cross-national mean of adjusted average annual growth in social spending” = “cross-national mean of unadjusted average annual growth in social spending.”

**Figure S1. Specific dimensions of social spending on children in OECD countries compared with the OECD averages in 2015**

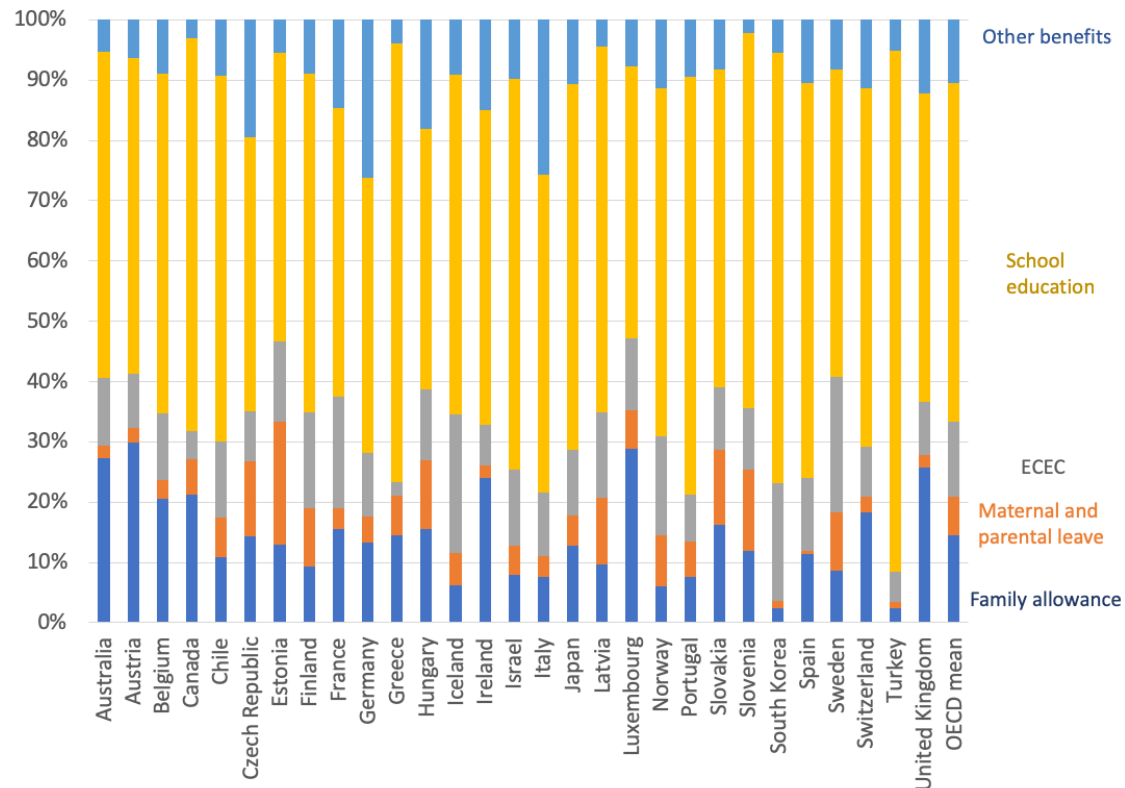

**Source:** Authors' analysis of data from Organization for Economic Cooperation and Development (OECD) Social Expenditure Database (SOCX).

**Notes:** Specific dimensions of social spending on children are shown for 29 OECD countries for which the information on all the dimensions of social spending on children are available (Denmark, Mexico, Netherlands, New Zealand, Poland, and the United States are excluded). The OECD mean is calculated for these 29 countries. ECEC: Early childhood education and care.

**Table S2. Association between total or five dimensions of social spending on children (US dollars) and the prevalence of childhood obesity (%) for countries with lower vs. higher gross domestic product (GDP) per capita: Cross sectional analyses in 2015**

| Types of social spending           | Lower GDP per capita  |                       |                       |         | Higher GDP per capita  |                       |                        |         | P-for-interaction <sup>a</sup> |
|------------------------------------|-----------------------|-----------------------|-----------------------|---------|------------------------|-----------------------|------------------------|---------|--------------------------------|
|                                    | Coefficients          | 95% CI                |                       | P value | Coefficients           | 95% CI                |                        | P value |                                |
|                                    |                       | Lower                 | Upper                 |         |                        | Lower                 | Upper                  |         |                                |
| <b>Girls</b>                       |                       |                       |                       |         |                        |                       |                        |         |                                |
| Total social spending <sup>b</sup> | $0.05 \times 10^{-3}$ | $-1.1 \times 10^{-3}$ | $1.2 \times 10^{-3}$  | 0.93    | $-0.2 \times 10^{-3}$  | $-0.4 \times 10^{-3}$ | $-0.02 \times 10^{-3}$ | 0.03    | 0.12                           |
| By dimension <sup>c</sup>          |                       |                       |                       |         |                        |                       |                        |         |                                |
| Family allowance                   | $2.4 \times 10^{-3}$  | $-1.6 \times 10^{-3}$ | $6.3 \times 10^{-3}$  | 0.19    | $-0.4 \times 10^{-3}$  | $-2.5 \times 10^{-3}$ | $1.8 \times 10^{-3}$   | 0.68    | 0.21                           |
| Maternal and parental leave        | $-2.6 \times 10^{-3}$ | $-6.8 \times 10^{-3}$ | $1.5 \times 10^{-3}$  | 0.17    | $0.5 \times 10^{-3}$   | $-7.3 \times 10^{-3}$ | $8.4 \times 10^{-3}$   | 0.87    | 0.33                           |
| ECEC                               | $-2.0 \times 10^{-3}$ | $-5.9 \times 10^{-3}$ | $2.0 \times 10^{-3}$  | 0.27    | $-0.7 \times 10^{-3}$  | $-4.8 \times 10^{-3}$ | $3.5 \times 10^{-3}$   | 0.70    | 0.49                           |
| Education                          | $-0.5 \times 10^{-3}$ | $-3.7 \times 10^{-3}$ | $2.8 \times 10^{-3}$  | 0.74    | $-0.3 \times 10^{-3}$  | $-1.1 \times 10^{-3}$ | $0.6 \times 10^{-3}$   | 0.49    | 0.61                           |
| Others                             | $-0.5 \times 10^{-3}$ | $-3.1 \times 10^{-3}$ | $2.1 \times 10^{-3}$  | 0.67    | $-0.01 \times 10^{-3}$ | $-1.9 \times 10^{-3}$ | $1.9 \times 10^{-3}$   | 0.99    | 0.78                           |
| <b>Boys</b>                        |                       |                       |                       |         |                        |                       |                        |         |                                |
| Total social spending <sup>b</sup> | $-0.1 \times 10^{-3}$ | $-1.5 \times 10^{-3}$ | $1.4 \times 10^{-3}$  | 0.92    | $-0.2 \times 10^{-3}$  | $-0.5 \times 10^{-3}$ | $-0.1 \times 10^{-3}$  | 0.04    | 0.07                           |
| By dimension <sup>c</sup>          |                       |                       |                       |         |                        |                       |                        |         |                                |
| Family allowance                   | $3.1 \times 10^{-3}$  | $-0.2 \times 10^{-3}$ | $6.3 \times 10^{-3}$  | 0.06    | $-0.4 \times 10^{-3}$  | $-2.0 \times 10^{-3}$ | $1.3 \times 10^{-3}$   | 0.58    | 0.33                           |
| Maternal and parental leave        | $-4.8 \times 10^{-3}$ | $-8.6 \times 10^{-3}$ | $-1.0 \times 10^{-3}$ | 0.02    | $1.3 \times 10^{-3}$   | $-5.4 \times 10^{-3}$ | $8.0 \times 10^{-3}$   | 0.64    | 0.41                           |
| ECEC                               | $-2.3 \times 10^{-3}$ | $-5.7 \times 10^{-3}$ | $1.3 \times 10^{-3}$  | 0.17    | $-1.3 \times 10^{-3}$  | $-4.2 \times 10^{-3}$ | $1.7 \times 10^{-3}$   | 0.32    | 0.64                           |
| Education                          | $-2.2 \times 10^{-3}$ | $-4.8 \times 10^{-3}$ | $0.4 \times 10^{-3}$  | 0.09    | $-0.3 \times 10^{-3}$  | $-1.2 \times 10^{-3}$ | $0.7 \times 10^{-3}$   | 0.54    | 0.35                           |
| Others                             | $-1.3 \times 10^{-3}$ | $-3.5 \times 10^{-3}$ | $1.0 \times 10^{-3}$  | 0.22    | $0.1 \times 10^{-3}$   | $-1.5 \times 10^{-3}$ | $1.6 \times 10^{-3}$   | 0.92    | 0.99                           |

We divided OECD countries in half according to GDP per capita in 2000 and repeated the regression analyses for each group. See Table 2 in the main text of the manuscript for more details.

<sup>a</sup> We formally tested the interaction between the level of GDP per capita in 2000 (lower vs. upper) and social spending on children using a Wald test.

<sup>b</sup> We regressed the prevalence of childhood obesity on total social spending on children. These analyses were conducted for 18 countries with lower GDP per capita in 2000 and 17 countries with higher GDP per capita in 2000.

<sup>c</sup> We regressed the prevalence of childhood obesity on five dimensions of social spending on children. These analyses were conducted for 17 countries with lower GDP per capita in 2000 and 16 countries with higher GDP per capita in 2000. Mexico and United States of America were excluded because either dimension of social spending is not available.

**Table S3. Association between changes in total or five dimensions of social spending on children (US dollars) and the prevalence of childhood obesity (%) for countries with lower vs. higher gross domestic product (GDP) per capita: Longitudinal analyses from 2000 to 2015**

| Types of social spending           | Lower GDP per capita  |                        |                       |         | Higher GDP per capita |                       |                       |         | P-for-interaction <sup>a</sup> |
|------------------------------------|-----------------------|------------------------|-----------------------|---------|-----------------------|-----------------------|-----------------------|---------|--------------------------------|
|                                    | Coefficients          | 95% CI                 |                       | P value | Coefficients          | 95% CI                |                       | P value |                                |
|                                    |                       | Lower                  | Upper                 |         |                       | Lower                 | Upper                 |         |                                |
| <b>Girls</b>                       |                       |                        |                       |         |                       |                       |                       |         |                                |
| Total social spending <sup>b</sup> | $-0.3 \times 10^{-2}$ | $-0.9 \times 10^{-2}$  | $0.3 \times 10^{-2}$  | 0.30    | $-0.4 \times 10^{-2}$ | $-1.1 \times 10^{-2}$ | $0.3 \times 10^{-2}$  | 0.26    | 0.46                           |
| By dimension <sup>c</sup>          |                       |                        |                       |         |                       |                       |                       |         |                                |
| Family allowance                   | $-5.8 \times 10^{-2}$ | $-13.4 \times 10^{-2}$ | $1.7 \times 10^{-2}$  | 0.11    | $-0.7 \times 10^{-2}$ | $-3.1 \times 10^{-2}$ | $1.6 \times 10^{-2}$  | 0.46    | 0.38                           |
| Maternal and parental leave        | $1.7 \times 10^{-2}$  | $-3.1 \times 10^{-2}$  | $6.4 \times 10^{-2}$  | 0.42    | $-0.5 \times 10^{-2}$ | $-3.4 \times 10^{-2}$ | $2.4 \times 10^{-2}$  | 0.67    | 0.58                           |
| ECEC                               | $1.2 \times 10^{-2}$  | $-4.9 \times 10^{-2}$  | $7.3 \times 10^{-2}$  | 0.65    | $1.6 \times 10^{-2}$  | $-4.2 \times 10^{-2}$ | $7.3 \times 10^{-2}$  | 0.52    | 0.11                           |
| Education                          | $0.6 \times 10^{-2}$  | $-1.1 \times 10^{-2}$  | $2.4 \times 10^{-2}$  | 0.41    | $1.4 \times 10^{-2}$  | $-2.5 \times 10^{-2}$ | $5.3 \times 10^{-2}$  | 0.39    | 0.90                           |
| Others                             | $-1.0 \times 10^{-2}$ | $-3.5 \times 10^{-2}$  | $1.4 \times 10^{-2}$  | 0.33    | $-1.3 \times 10^{-2}$ | $-4.0 \times 10^{-2}$ | $1.5 \times 10^{-2}$  | 0.29    | 0.91                           |
| <b>Boys</b>                        |                       |                        |                       |         |                       |                       |                       |         |                                |
| Total social spending <sup>b</sup> | $-0.3 \times 10^{-2}$ | $-1.3 \times 10^{-2}$  | $0.7 \times 10^{-2}$  | 0.52    | $-0.2 \times 10^{-2}$ | $-1.3 \times 10^{-2}$ | $0.8 \times 10^{-2}$  | 0.64    | 0.36                           |
| By dimension <sup>c</sup>          |                       |                        |                       |         |                       |                       |                       |         |                                |
| Family allowance                   | $-5.5 \times 10^{-2}$ | $-19.7 \times 10^{-2}$ | $8.6 \times 10^{-2}$  | 0.38    | $-0.8 \times 10^{-2}$ | $-4.5 \times 10^{-2}$ | $3.0 \times 10^{-2}$  | 0.62    | 0.61                           |
| Maternal and parental leave        | $1.4 \times 10^{-2}$  | $-7.7 \times 10^{-2}$  | $10.4 \times 10^{-2}$ | 0.73    | $0.1 \times 10^{-2}$  | $-5.1 \times 10^{-2}$ | $5.2 \times 10^{-2}$  | 0.97    | 0.41                           |
| ECEC                               | $0.7 \times 10^{-2}$  | $-9.2 \times 10^{-2}$  | $10.7 \times 10^{-2}$ | 0.86    | $1.1 \times 10^{-2}$  | $-8.8 \times 10^{-2}$ | $11.0 \times 10^{-2}$ | 0.78    | 0.29                           |
| Education                          | $0.1 \times 10^{-2}$  | $-3.1 \times 10^{-2}$  | $3.3 \times 10^{-2}$  | 0.92    | $1.0 \times 10^{-2}$  | $-5.1 \times 10^{-2}$ | $7.1 \times 10^{-2}$  | 0.68    | 0.91                           |
| Others                             | $-0.2 \times 10^{-2}$ | $-4.7 \times 10^{-2}$  | $4.4 \times 10^{-2}$  | 0.93    | $-0.7 \times 10^{-2}$ | $-5.7 \times 10^{-2}$ | $4.3 \times 10^{-2}$  | 0.74    | 0.44                           |

We divided OECD countries in half according to GDP per capita in 2000 and repeated the regression analyses for each group. See Table 3 in the main text of the manuscript for more details.

<sup>a</sup> We formally tested the interaction between the level of GDP per capita in 2000 (lower vs. upper) and changes in social spending on children using a Wald test.

<sup>b</sup> We regressed the change in the prevalence of childhood obesity on the change in total social spending on children. The analyses were conducted for 17 countries with lower GDP per capita in 2000 and 16 countries with higher GDP per capita in 2000.

<sup>c</sup> We regressed the change in the prevalence of childhood obesity on the changes in five dimensions of social spending on children. The analyses were conducted for 16 countries with lower GDP per capita in 2000 and 15 countries with higher GDP per capita in 2000.
